# Supplementary material for: Practical catalytic enantioselective synthesis of 2,3-dihydroquin-azolinones by chiral brønsted acid catalysis
Source: Royal Society of Chemistry journal article supplement (doi:10.1039/d1ob00070e), 2021-01-01
Supplement: d1ob00070e1.pdf [file d1ob00070e1.pdf]

# Practical Catalytic Enantioselective Synthesis of 2,3-Dihydroquinazolinones by Chiral Brønsted Acid Catalysis

Yongbiao Guo\*; Zhenhua Gao; Junchen Li; Xiaojing Bi; Enxue Shi, Junhua Xiao

*State Key Laboratory of NBC Protection for Civilian, Beijing, P.R. China.*

\*Corresponding author (van87120@126.com)

## Supporting Information

### Table of Contents

|                                                                     |    |
|---------------------------------------------------------------------|----|
| 1. DFT calculations on the reaction mechanism.....                  | 2  |
| 2. Experimental Section and compound characterization.....          | 2  |
| 3. NMR and HRM spectrum of 2,3-Dihydroquinazolinones <b>3</b> ..... | 41 |
| 4. HPLC of 2,3-Dihydroquinazolinones <b>3</b> .....                 | 86 |

#### 1. DFT calculations on the reaction mechanism

DFT calculations were performed using the Gaussian 16 package (M. J. Frisch, M. J. et al. Gaussian,

Inc., Wallingford CT, 2016). All the structures were optimized using the M06-2X functional with the basis set 6-311G\*\* and 6-31+G\* for the H and O atoms respectively involved in the hydrogen bonding interactions and 6-31G\* for other atoms. A correction of  $-2.6$  kcal/mol was made for two-to-one (or  $2.6$  kcal/mol for one-to-two) transformations. Vibrational analyses were performed to ensure intermediates to have no imaginary frequencies and the transition state structures to have only one imaginary frequency. Transition state structures were confirmed to connect appropriate reactants or products by intrinsic reaction coordinate (IRC) calculations. Solvent effects were considered using the SMD mode at the M06-2X/6-311++G\*\* level.

**Table S1. The energies of calculated structures.**

|                     | E          | G          | E <sub>sol</sub> | G <sub>sol</sub> |
|---------------------|------------|------------|------------------|------------------|
| <b>Cat.11</b>       | -1996.4836 | -1995.9254 | -1996.9810       | -1996.4228       |
| <b>1a</b>           | -456.1282  | -456.0147  | -456.2699        | -456.1564        |
| <b>2a</b>           | -231.1138  | -231.0494  | -231.1923        | -231.1279        |
| <b>TS1</b>          | -2683.7745 | -2682.9898 | -2684.4710       | -2683.6863       |
| <b>1a-I</b>         | -2683.7840 | -2682.9913 | -2684.4818       | -2683.6892       |
| <b>1a-II</b>        | -2683.7930 | -2683.0039 | -2684.4869       | -2683.6978       |
| <b>TS2</b>          | -2683.7648 | -2682.9760 | -2684.4668       | -2683.6780       |
| <b>1a-III</b>       | -2607.3707 | -2606.6120 | -2608.0457       | -2607.2870       |
| <b>H2O</b>          | -76.3852   | -76.3811   | -76.4252         | -76.4211         |
| <b>TS3</b>          | -2607.3563 | -2606.5919 | -2608.0290       | -2607.2646       |
| <b>3aa+Ccat.11</b>  | -2607.3893 | -2606.6235 | -2608.0577       | -2607.2920       |
| <b>TS3'</b>         | -2607.3459 | -2606.5821 | -2608.0197       | -2607.2559       |
| <b>TScat.14(Re)</b> | -3078.8736 | -3077.7791 | -3079.6808       | -3078.5862       |
| <b>TScat.14(Si)</b> | -3078.8704 | -3077.7753 | -3079.6776       | -3078.5825       |

### Cartesian coordinates

#### Cat.11

|   |             |             |             |
|---|-------------|-------------|-------------|
| P | 0.00627800  | -0.77378900 | -0.23503500 |
| O | -0.60461900 | -1.56258300 | -1.30847400 |
| O | 0.72942500  | -1.54069200 | 0.95618400  |
| H | 1.21930700  | 4.44183900  | 2.82089400  |
| H | 1.53296000  | 5.16125200  | 1.24200700  |
| H | 3.80301400  | 3.26954100  | 2.49607800  |
| C | 1.17716800  | 4.25287700  | 1.74438500  |
| C | 3.25405100  | 2.66042800  | 1.78394600  |
| H | -0.87788400 | 4.71726500  | 1.05090600  |
| C | -0.23048000 | 3.86062200  | 1.26018000  |
| C | 1.99914400  | 3.05165800  | 1.33729400  |
| H | -0.72183900 | 3.23929200  | 2.01720600  |
| C | 3.79197700  | 1.46042600  | 1.32445300  |
| H | 4.77101300  | 1.13690600  | 1.66593900  |
| H | 0.87606100  | 4.77321800  | -1.00301500 |

|   |             |             |             |
|---|-------------|-------------|-------------|
| H | -1.53910900 | 5.18822800  | -1.15284000 |
| C | 1.29535700  | 2.27746000  | 0.40873600  |
| C | 0.02145800  | 2.99079600  | -0.00545500 |
| C | 0.24196900  | 3.91279600  | -1.23739700 |
| C | -1.18104200 | 4.29787000  | -1.68491200 |
| C | 3.08403900  | 0.62829700  | 0.45162700  |
| C | 1.82975000  | 1.06465600  | 0.00115700  |
| C | -1.24187800 | 2.26500100  | -0.43250000 |
| C | -1.98199300 | 3.07430500  | -1.30028100 |
| H | 0.73309000  | 3.33075400  | -2.02497100 |
| O | -0.94583600 | 0.15532800  | 0.67077100  |
| H | -1.24310600 | 4.51593500  | -2.75496600 |
| C | -1.75405000 | 1.02954700  | -0.06456400 |
| C | 3.79138000  | -1.70688500 | 1.03133100  |
| C | 3.61371000  | -0.70773000 | 0.05345100  |
| C | -3.25201300 | 2.69368100  | -1.71136900 |
| O | 1.09708800  | 0.24925000  | -0.85418900 |
| C | -3.86366200 | -0.90681200 | 1.35016200  |
| C | -3.03357300 | 0.61517300  | -0.45340900 |
| H | -3.83006600 | 3.32538700  | -2.37962300 |
| C | -3.77568700 | 1.48343000  | -1.26147000 |
| C | 4.22915200  | -2.97299900 | 0.63277700  |
| H | -4.62038300 | -2.28805100 | 2.80523900  |
| C | 3.91435500  | -0.98033200 | -1.29412300 |
| H | 4.35326500  | -3.74674700 | 1.38766000  |
| C | -4.41157300 | -2.12558300 | 1.74975500  |
| C | -3.59574700 | -0.69368000 | -0.01255100 |
| H | -4.77528500 | 1.17936700  | -1.55779900 |
| C | 4.51688900  | -3.26712000 | -0.69931700 |
| C | 4.36534700  | -2.25268000 | -1.64330700 |
| C | -4.69633000 | -3.13545400 | 0.83419400  |
| C | -3.87945300 | -1.69661000 | -0.95699500 |
| H | 4.60011000  | -2.45786300 | -2.68571100 |
| C | -4.42094800 | -2.90155400 | -0.51211200 |
| H | -4.62530800 | -3.68412400 | -1.24001100 |
| C | -3.59013400 | -1.50469800 | -2.42531900 |
| H | -2.57572300 | -1.12573100 | -2.57132900 |
| H | -3.67735700 | -2.45726000 | -2.95408000 |
| H | -4.28987000 | -0.80093800 | -2.88917300 |
| C | -5.30939100 | -4.43878900 | 1.27949100  |
| H | -6.39610000 | -4.43050800 | 1.13763100  |
| H | -4.91074200 | -5.27964200 | 0.70456900  |
| H | -5.11561600 | -4.62695600 | 2.33896500  |
| C | -3.57782100 | 0.15670100  | 2.38191900  |

|   |             |             |             |
|---|-------------|-------------|-------------|
| H | -2.50111200 | 0.25449400  | 2.55801100  |
| H | -3.94872700 | 1.13526000  | 2.06057500  |
| H | -4.05334100 | -0.09425300 | 3.33351400  |
| C | 3.76546200  | 0.07740900  | -2.35832900 |
| H | 2.71285900  | 0.21086700  | -2.62797300 |
| H | 4.14337600  | 1.04421100  | -2.01257200 |
| H | 4.31436500  | -0.20566200 | -3.25982400 |
| C | 4.96152300  | -4.64601800 | -1.11430400 |
| H | 4.12489800  | -5.21507600 | -1.53425400 |
| H | 5.74028200  | -4.59561100 | -1.88064100 |
| H | 5.35382500  | -5.20983500 | -0.26403200 |
| C | 3.50483200  | -1.45269000 | 2.49394600  |
| H | 3.38039300  | -2.39933000 | 3.02665700  |
| H | 4.32804600  | -0.91162700 | 2.97281400  |
| H | 2.59835800  | -0.85703300 | 2.62953800  |
| H | 1.44299300  | -2.12213700 | 0.64926300  |

**1a**

|   |             |             |             |
|---|-------------|-------------|-------------|
| C | -1.69529300 | -0.18415500 | -0.05389900 |
| C | -0.20682500 | -0.22613200 | -0.03507400 |
| C | 0.53347100  | 0.97769800  | 0.06106500  |
| C | 1.93941000  | 0.88855700  | 0.09581900  |
| C | 2.58509200  | -0.33063700 | 0.01006500  |
| C | 1.85738900  | -1.51706600 | -0.11814500 |
| C | 0.47468200  | -1.44653900 | -0.13853600 |
| N | -0.07642600 | 2.19933400  | 0.17816600  |
| N | -2.33836700 | -1.35022900 | 0.27247800  |
| O | -2.33955500 | 0.81201900  | -0.36471800 |
| H | 0.49926900  | 3.00524400  | 0.00067700  |
| H | -1.03444900 | 2.24256300  | -0.13939700 |
| H | -3.33742900 | -1.25958800 | 0.37289500  |
| H | -1.88101600 | -2.01775400 | 0.87027000  |
| H | 2.51446000  | 1.80617900  | 0.18819300  |
| H | 3.67049300  | -0.35843800 | 0.03121300  |
| H | 2.36263100  | -2.47164800 | -0.21035200 |
| H | -0.10152000 | -2.35680700 | -0.27803900 |

**2a**

|   |             |             |             |
|---|-------------|-------------|-------------|
| C | -1.04316500 | -0.00006700 | 0.32749700  |
| O | -2.15978100 | 0.00002900  | -0.12754800 |
| H | -0.87229100 | -0.00005900 | 1.42905100  |
| C | 0.19821700  | -0.00000600 | -0.47505600 |
| C | 1.38705600  | 0.74264900  | 0.09660600  |
| C | 1.38709800  | -0.74262000 | 0.09657000  |

|   |            |             |             |
|---|------------|-------------|-------------|
| H | 0.05173100 | 0.00001400  | -1.54782500 |
| H | 1.24369300 | 1.25364200  | 1.04393200  |
| H | 2.01802500 | 1.26700200  | -0.61114000 |
| H | 2.01809400 | -1.26690300 | -0.61120500 |
| H | 1.24376600 | -1.25366900 | 1.04387000  |

**TS1**

|   |             |             |             |
|---|-------------|-------------|-------------|
| P | -0.61355900 | -0.03144800 | -0.13020500 |
| O | 0.32810200  | -0.20471800 | -1.26385200 |
| O | -0.22371600 | 0.89267100  | 1.03610000  |
| H | -5.47321300 | -1.09827900 | 3.28777000  |
| H | -6.47278100 | -1.02052000 | 1.83806400  |
| H | -5.43633500 | 1.76790400  | 3.05365200  |
| C | -5.43582000 | -1.01652400 | 2.19743500  |
| C | -4.76697700 | 1.52011800  | 2.23476900  |
| H | -5.18777100 | -3.05826700 | 1.36348000  |
| C | -4.61316800 | -2.14417300 | 1.54251200  |
| C | -4.70534200 | 0.22551400  | 1.73655100  |
| H | -3.75867800 | -2.39667000 | 2.18004600  |
| C | -3.94615500 | 2.50068800  | 1.67749000  |
| H | -3.98818300 | 3.52069000  | 2.04964700  |
| H | -6.17120500 | -1.35710500 | -0.47864200 |
| H | -5.64191000 | -3.72258400 | -0.89150500 |
| C | -3.84458600 | -0.08925000 | 0.68106200  |
| C | -4.07638200 | -1.51763600 | 0.22510900  |
| C | -5.17594500 | -1.58221700 | -0.87416900 |
| C | -5.05015200 | -2.99772100 | -1.46525400 |
| C | -3.02768700 | 2.20093300  | 0.66649300  |
| C | -2.98400900 | 0.88202300  | 0.19304100  |
| C | -2.99634800 | -2.36801400 | -0.42202900 |
| C | -3.57066100 | -3.27115100 | -1.32087400 |
| H | -4.93916100 | -0.83956000 | -1.64430100 |
| O | -1.05993400 | -1.41186700 | 0.59680100  |
| H | -5.38800200 | -3.05587800 | -2.50414200 |
| C | -1.62048700 | -2.37901700 | -0.22775500 |
| C | -1.14394200 | 3.85169100  | 0.91864200  |
| C | -2.11994900 | 3.24659500  | 0.10927800  |
| C | -2.79074800 | -4.22206700 | -1.96438600 |
| O | -2.02258300 | 0.52473800  | -0.73855800 |
| C | 1.20367900  | -3.79063800 | 0.56558300  |
| C | -0.80274700 | -3.32305100 | -0.86783400 |
| H | -3.23697900 | -4.92757100 | -2.65949100 |
| C | -1.42036700 | -4.24874500 | -1.71711600 |
| C | -0.32150200 | 4.83759700  | 0.36699900  |

|   |             |             |             |
|---|-------------|-------------|-------------|
| H | 2.98566400  | -4.17699600 | 1.69132700  |
| C | -2.25558100 | 3.63643200  | -1.23763500 |
| H | 0.44309800  | 5.29226100  | 0.99442300  |
| C | 2.58570900  | -3.85841800 | 0.73003400  |
| C | 0.67753700  | -3.37052100 | -0.66658400 |
| H | -0.79455800 | -4.99039600 | -2.20580500 |
| C | -0.46125600 | 5.26011000  | -0.95217600 |
| C | -1.42848300 | 4.63808500  | -1.74250100 |
| C | 3.46371900  | -3.47760400 | -0.28187800 |
| C | 1.54237000  | -3.02696300 | -1.71937600 |
| H | -1.55139100 | 4.94935400  | -2.77824100 |
| C | 2.92125000  | -3.07132600 | -1.50019800 |
| H | 3.59152500  | -2.78893000 | -2.31172000 |
| C | 1.01344400  | -2.60061400 | -3.06649900 |
| H | 0.23596900  | -1.84200900 | -2.95139800 |
| H | 1.81954000  | -2.17952200 | -3.67557700 |
| H | 0.59000000  | -3.44638300 | -3.61945200 |
| C | 4.95488600  | -3.49069400 | -0.05493800 |
| H | 5.49744600  | -3.23693100 | -0.97025400 |
| H | 5.24195300  | -2.76320700 | 0.71410200  |
| H | 5.29736300  | -4.47528000 | 0.28074700  |
| C | 0.29576500  | -4.10024700 | 1.72635900  |
| H | -0.11058100 | -3.16519600 | 2.12907500  |
| H | -0.54776700 | -4.73070300 | 1.42850300  |
| H | 0.84363100  | -4.60742300 | 2.52502400  |
| C | -3.28842700 | 3.00099500  | -2.13462100 |
| H | -2.99610800 | 1.97948600  | -2.39925700 |
| H | -4.26398400 | 2.94647600  | -1.64143100 |
| H | -3.40099300 | 3.57434900  | -3.05844700 |
| C | 0.37061100  | 6.39365800  | -1.49953700 |
| H | 0.64675700  | 6.22350300  | -2.54517600 |
| H | -0.18606300 | 7.33680900  | -1.46001600 |
| H | 1.28854700  | 6.52867400  | -0.91984800 |
| C | -0.95761400 | 3.47899600  | 2.36967500  |
| H | 0.09362500  | 3.59652700  | 2.65118600  |
| H | -1.55179400 | 4.12960000  | 3.02286900  |
| H | -1.24930100 | 2.44495100  | 2.55598300  |
| C | 2.55691700  | -0.42843900 | 1.94798600  |
| C | 3.94159600  | -0.19568600 | 1.42698300  |
| C | 4.13857800  | 0.01418900  | 0.05128200  |
| C | 5.43484500  | 0.16800700  | -0.44213500 |
| C | 6.52891500  | 0.08062600  | 0.41203600  |
| C | 6.34049700  | -0.13928200 | 1.77444400  |
| C | 5.04785500  | -0.27006400 | 2.27351500  |

|   |            |             |             |
|---|------------|-------------|-------------|
| N | 3.02958200 | 0.21265400  | -0.79725300 |
| N | 2.27752900 | 0.08343100  | 3.18605500  |
| O | 1.75070300 | -1.08575100 | 1.31330700  |
| H | 3.27310500 | 0.15693200  | -1.78051400 |
| H | 2.23365100 | -0.41048900 | -0.61681800 |
| H | 1.28638000 | 0.07723800  | 3.39091300  |
| H | 2.75711900 | 0.93643300  | 3.43266800  |
| H | 5.57867000 | 0.35159100  | -1.50406100 |
| H | 7.53146400 | 0.18360400  | 0.00943300  |
| H | 7.19265800 | -0.21387500 | 2.44127300  |
| H | 4.88407400 | -0.45851100 | 3.33061700  |
| C | 2.25506700 | 1.99246400  | -0.43351500 |
| O | 1.91725500 | 1.96379200  | 0.79305600  |
| H | 1.48171400 | 1.83534600  | -1.19700100 |
| H | 0.79337100 | 1.40945600  | 0.93542700  |
| C | 3.38471700 | 2.86516300  | -0.83585800 |
| C | 3.74833400 | 2.95403700  | -2.29077700 |
| C | 3.00633500 | 4.08093900  | -1.64499700 |
| H | 4.16726500 | 2.96692600  | -0.09266600 |
| H | 3.19378600 | 2.32979200  | -2.98727400 |
| H | 4.79403400 | 3.09659500  | -2.53949500 |
| H | 3.53520300 | 5.00429700  | -1.43719200 |
| H | 1.95438100 | 4.19887100  | -1.88771700 |

**1a-I**

|   |             |             |             |
|---|-------------|-------------|-------------|
| P | -0.59411200 | -0.02145100 | -0.00492300 |
| O | 0.36725300  | -0.26528500 | -1.12819900 |
| O | -0.20094500 | 0.89583000  | 1.12520000  |
| H | -5.60799100 | -1.03651100 | 3.16169900  |
| H | -6.54909100 | -0.96240000 | 1.67338000  |
| H | -5.55345900 | 1.83252100  | 2.89919500  |
| C | -5.52692200 | -0.96245100 | 2.07309100  |
| C | -4.84719200 | 1.57181100  | 2.11602600  |
| H | -5.26145000 | -3.01089800 | 1.26074900  |
| C | -4.68676400 | -2.10062600 | 1.45883300  |
| C | -4.76963400 | 0.27180900  | 1.63409100  |
| H | -3.86139900 | -2.35635700 | 2.13228000  |
| C | -3.99313600 | 2.54058600  | 1.58929200  |
| H | -4.04733300 | 3.56463100  | 1.94860700  |
| H | -6.15682300 | -1.29995400 | -0.61816900 |
| H | -5.63213700 | -3.67115000 | -1.01384500 |
| C | -3.86405800 | -0.05684400 | 0.62180400  |
| C | -4.09112200 | -1.48481100 | 0.16247300  |
| C | -5.15012600 | -1.53546200 | -0.97704700 |

|   |             |             |             |
|---|-------------|-------------|-------------|
| C | -5.01727700 | -2.94968100 | -1.56744500 |
| C | -3.02714400 | 2.22400100  | 0.62866900  |
| C | -2.97074900 | 0.90133000  | 0.16549900  |
| C | -2.99598400 | -2.34485400 | -0.44685400 |
| C | -3.54530700 | -3.23305800 | -1.37592800 |
| H | -4.87648000 | -0.79355900 | -1.73561100 |
| O | -1.09635800 | -1.42556700 | 0.66634700  |
| H | -5.32225100 | -3.00372500 | -2.61675900 |
| C | -1.62690000 | -2.36480200 | -0.20168900 |
| C | -1.14470300 | 3.85155000  | 0.99104900  |
| C | -2.07388200 | 3.25342500  | 0.12049700  |
| C | -2.75119800 | -4.17844500 | -2.00953900 |
| O | -1.97220200 | 0.52506900  | -0.71267900 |
| C | 1.19640600  | -3.79876600 | 0.60299000  |
| C | -0.79511200 | -3.29837200 | -0.84304100 |
| H | -3.17903200 | -4.87231700 | -2.72756600 |
| C | -1.38857400 | -4.20892600 | -1.72511300 |
| C | -0.26668000 | 4.81223900  | 0.48886800  |
| H | 2.96657000  | -4.20888100 | 1.73978500  |
| C | -2.10678600 | 3.62806400  | -1.23468000 |
| H | 0.46201700  | 5.25955900  | 1.16231900  |
| C | 2.57729800  | -3.86583400 | 0.78261800  |
| C | 0.68261600  | -3.34888400 | -0.62275900 |
| H | -0.74892800 | -4.94101500 | -2.21073500 |
| C | -0.29741200 | 5.21375700  | -0.84528100 |
| C | -1.21987900 | 4.60344200  | -1.69362100 |
| C | 3.46520500  | -3.45196000 | -0.20598200 |
| C | 1.55957600  | -2.97697500 | -1.65701100 |
| H | -1.26158700 | 4.90152200  | -2.73982200 |
| C | 2.93609900  | -3.01405500 | -1.42060300 |
| H | 3.61624400  | -2.71881400 | -2.22055600 |
| C | 1.04468900  | -2.53274500 | -3.00369100 |
| H | 0.24453500  | -1.79939700 | -2.88400300 |
| H | 1.85042200  | -2.07751000 | -3.58966800 |
| H | 0.65593200  | -3.37730600 | -3.58322600 |
| C | 4.95280100  | -3.46412700 | 0.04119800  |
| H | 5.50839100  | -3.18214600 | -0.85825100 |
| H | 5.22386700  | -2.75845600 | 0.83602100  |
| H | 5.29623100  | -4.45579700 | 0.35388200  |
| C | 0.27504300  | -4.13866600 | 1.74382800  |
| H | -0.14070500 | -3.21348000 | 2.15917800  |
| H | -0.56148200 | -4.76475900 | 1.41870900  |
| H | 0.81378600  | -4.66131400 | 2.53874800  |
| C | -3.08906900 | 3.00507800  | -2.19496200 |



|              |             |             |             |
|--------------|-------------|-------------|-------------|
| H            | -2.79757800 | 1.97723700  | -2.43451600 |
| H            | -4.09521500 | 2.96913500  | -1.76569900 |
| H            | -3.13218200 | 3.57589500  | -3.12637300 |
| C            | 0.60962200  | 6.31291800  | -1.34035800 |
| H            | 0.80677700  | 6.21944100  | -2.41289200 |
| H            | 0.15559500  | 7.29681200  | -1.17584100 |
| H            | 1.56837400  | 6.30250900  | -0.81259900 |
| C            | -1.06717500 | 3.47574800  | 2.45070800  |
| H            | -0.06813100 | 3.69626200  | 2.84039800  |
| H            | -1.78828400 | 4.04458000  | 3.04964700  |
| H            | -1.26665700 | 2.41173700  | 2.58753000  |
| C            | 2.44280100  | -0.34905300 | 2.04166200  |
| C            | 3.84211300  | -0.14111900 | 1.53389300  |
| C            | 4.04842200  | 0.03765500  | 0.16320600  |
| C            | 5.32992600  | 0.11487700  | -0.36404000 |
| C            | 6.43054800  | -0.00298300 | 0.48280300  |
| C            | 6.24095600  | -0.17065900 | 1.85080400  |
| C            | 4.94976000  | -0.23628600 | 2.37255200  |
| N            | 2.90955700  | 0.27045300  | -0.70329300 |
| N            | 2.07062900  | 0.34823900  | 3.15129400  |
| O            | 1.72104200  | -1.14718300 | 1.47395400  |
| H            | 3.15131100  | 0.06585000  | -1.67363500 |
| H            | 2.07843200  | -0.33604300 | -0.50411600 |
| H            | 1.06083300  | 0.37452700  | 3.25047500  |
| H            | 2.52805700  | 1.23890800  | 3.28332500  |
| H            | 5.46668800  | 0.27587000  | -1.43055100 |
| H            | 7.43255600  | 0.04247700  | 0.06993700  |
| H            | 7.09654300  | -0.25919700 | 2.51186700  |
| H            | 4.79084000  | -0.38451600 | 3.43643800  |
| C            | 2.37105300  | 1.75919100  | -0.63726400 |
| O            | 2.05604700  | 2.04115500  | 0.65182600  |
| H            | 1.50375600  | 1.70428400  | -1.30257600 |
| H            | 1.13376300  | 1.67721800  | 0.85896200  |
| C            | 3.42869300  | 2.66811800  | -1.17819000 |
| C            | 3.65676600  | 2.68460100  | -2.66641100 |
| C            | 2.96472600  | 3.83511200  | -1.99529100 |
| H            | 4.28162500  | 2.81550500  | -0.52479100 |
| H            | 3.04515600  | 2.03168000  | -3.28489600 |
| H            | 4.66979500  | 2.82847100  | -3.02541000 |
| H            | 3.50453400  | 4.76933400  | -1.89170000 |
| H            | 1.89323200  | 3.93910900  | -2.14100100 |
| <b>1a-II</b> |             |             |             |
| P            | 0.58521100  | -0.02432800 | -0.07831600 |

|   |             |             |             |
|---|-------------|-------------|-------------|
| O | -0.39967100 | -0.39202700 | 1.07240200  |
| O | 0.14875500  | 0.88543000  | -1.15630700 |
| H | 6.05489600  | -1.24146700 | -2.39522400 |
| H | 6.69505200  | -1.23303300 | -0.75305000 |
| H | 6.09197700  | 1.62153900  | -2.06074400 |
| C | 5.76996000  | -1.18000900 | -1.34089000 |
| C | 5.23432800  | 1.38477600  | -1.43770700 |
| H | 5.26358100  | -3.22440600 | -0.64299000 |
| C | 4.77944600  | -2.28486400 | -0.92613100 |
| C | 4.99743100  | 0.08073400  | -1.02416900 |
| H | 4.08966000  | -2.49222200 | -1.75193200 |
| C | 4.35510000  | 2.39065500  | -1.04171300 |
| H | 4.54093400  | 3.42061600  | -1.33258400 |
| H | 5.84137500  | -1.59379400 | 1.43101100  |
| H | 5.18312400  | -3.95292900 | 1.61283300  |
| C | 3.90121200  | -0.21762500 | -0.21018800 |
| C | 3.97124100  | -1.66115200 | 0.24745100  |
| C | 4.77599000  | -1.79976600 | 1.57110700  |
| C | 4.48129100  | -3.23262500 | 2.05191900  |
| C | 3.20871400  | 2.11379500  | -0.28769500 |
| C | 2.99772300  | 0.78620700  | 0.10249900  |
| C | 2.74731600  | -2.49120100 | 0.58637300  |
| C | 3.07820700  | -3.46211500 | 1.53754400  |
| H | 4.38138100  | -1.07780100 | 2.29480500  |
| O | 1.08008800  | -1.41304800 | -0.76098700 |
| H | 4.54943500  | -3.33804300 | 3.13853100  |
| C | 1.45751800  | -2.45675300 | 0.07731100  |
| C | 1.54047900  | 3.91170900  | -0.84477700 |
| C | 2.27501600  | 3.20300900  | 0.12080500  |
| C | 2.16171800  | -4.43807600 | 1.90366600  |
| O | 1.84301700  | 0.45375300  | 0.80876800  |
| C | -0.97290800 | -3.71388900 | -1.58539200 |
| C | 0.51568300  | -3.43948000 | 0.40909800  |
| H | 2.42124500  | -5.19446900 | 2.63860400  |
| C | 0.89897100  | -4.43419500 | 1.31445100  |
| C | 0.71329400  | 4.95414300  | -0.42602500 |
| H | -2.34599000 | -4.01971900 | -3.20625600 |
| C | 2.16903700  | 3.54316900  | 1.48165700  |
| H | 0.15248400  | 5.51086700  | -1.17399800 |
| C | -2.24966000 | -3.79737500 | -2.14482300 |
| C | -0.84251100 | -3.45655100 | -0.20730800 |
| H | 0.17716700  | -5.20504200 | 1.56903500  |
| C | 0.57760600  | 5.29629700  | 0.91664900  |
| C | 1.31885500  | 4.58205200  | 1.85602400  |

|   |             |             |             |
|---|-------------|-------------|-------------|
| C | -3.40413400 | -3.61382200 | -1.38109800 |
| C | -1.99045200 | -3.28812000 | 0.58690700  |
| H | 1.23940100  | 4.84398800  | 2.90939500  |
| C | -3.24883200 | -3.36106800 | -0.01850400 |
| H | -4.13564800 | -3.23082800 | 0.60173300  |
| C | -1.89959900 | -3.04684600 | 2.07445300  |
| H | -1.05071700 | -2.40509100 | 2.32219900  |
| H | -2.81288300 | -2.56567500 | 2.43524100  |
| H | -1.77624700 | -3.99055100 | 2.61830500  |
| C | -4.76903200 | -3.65213600 | -2.01314200 |
| H | -5.51281300 | -4.06252800 | -1.32409900 |
| H | -5.07264800 | -2.63343200 | -2.27584100 |
| H | -4.76886300 | -4.26094800 | -2.92141800 |
| C | 0.23949400  | -3.91989200 | -2.45913700 |
| H | 0.78188100  | -2.97910900 | -2.60360800 |
| H | 0.93705200  | -4.63221000 | -2.00743200 |
| H | -0.05328400 | -4.29924800 | -3.44127900 |
| C | 2.96529000  | 2.81389900  | 2.53580000  |
| H | 2.56978100  | 1.80552200  | 2.69849100  |
| H | 4.01548500  | 2.71221000  | 2.24389300  |
| H | 2.92440400  | 3.35042800  | 3.48717200  |
| C | -0.36829800 | 6.38741900  | 1.34812700  |
| H | 0.04400200  | 6.97040600  | 2.17702200  |
| H | -0.58624300 | 7.07350600  | 0.52430600  |
| H | -1.32044200 | 5.96288000  | 1.68851200  |
| C | 1.59154100  | 3.53891000  | -2.30537100 |
| H | 0.95513000  | 4.20748800  | -2.89159200 |
| H | 2.60346800  | 3.59629000  | -2.71638800 |
| H | 1.23273300  | 2.51237000  | -2.43330000 |
| C | -3.20989400 | 0.17479700  | -1.94000700 |
| C | -3.07646500 | 1.63004100  | -1.61240100 |
| C | -3.70844600 | 2.15193500  | -0.47020200 |
| C | -3.48361400 | 3.48185400  | -0.11427700 |
| C | -2.67618800 | 4.29917000  | -0.89676900 |
| C | -2.08875700 | 3.79494300  | -2.05459200 |
| C | -2.27891600 | 2.46407100  | -2.39981100 |
| N | -4.56578500 | 1.36794500  | 0.36055800  |
| N | -2.10237400 | -0.40540400 | -2.44531800 |
| O | -4.25236700 | -0.45828000 | -1.73284600 |
| H | -5.08565200 | 0.72193100  | -0.22761300 |
| H | -1.39638600 | -0.30123000 | 0.91289300  |
| H | -2.13413800 | -1.41091900 | -2.55368400 |
| H | -1.20135400 | 0.04006200  | -2.29689900 |
| H | -3.97868100 | 3.86256100  | 0.77399400  |

|   |             |             |             |
|---|-------------|-------------|-------------|
| H | -2.51950800 | 5.33598400  | -0.61306500 |
| H | -1.47789200 | 4.43403400  | -2.68364200 |
| H | -1.80173800 | 2.05999700  | -3.28765600 |
| C | -3.89261200 | 0.61783900  | 1.38689300  |
| O | -2.91395000 | -0.30659200 | 0.86293900  |
| H | -3.33462700 | -0.91666200 | 0.23457400  |
| C | -4.88511500 | -0.13199700 | 2.23256000  |
| C | -4.48124700 | -0.55796300 | 3.61240800  |
| C | -5.47957600 | 0.54952500  | 3.42566700  |
| H | -5.52825300 | -0.80083900 | 1.66500500  |
| H | -3.47943500 | -0.29499200 | 3.93976600  |
| H | -4.83710200 | -1.51470100 | 3.97874300  |
| H | -6.51919200 | 0.35257100  | 3.66031100  |
| H | -5.15778000 | 1.56677400  | 3.62635900  |
| H | -3.30338700 | 1.30254900  | 2.00445200  |

**TS2**

|   |             |             |             |
|---|-------------|-------------|-------------|
| P | -0.56067700 | 0.05815200  | -0.09110500 |
| O | 0.47636900  | 0.45428700  | 0.92012600  |
| O | -0.23549100 | -0.80687800 | -1.26609700 |
| H | -6.22799500 | 0.93059900  | -2.21250500 |
| H | -6.80333000 | 0.86793400  | -0.54750000 |
| H | -6.08603000 | -1.92865800 | -1.90070500 |
| C | -5.89948400 | 0.87825000  | -1.17013000 |
| C | -5.21743500 | -1.64571000 | -1.31288400 |
| H | -5.49506200 | 2.94420400  | -0.46909100 |
| C | -4.96514400 | 2.03839700  | -0.77976500 |
| C | -5.03727100 | -0.33358700 | -0.89716000 |
| H | -4.31916900 | 2.29434000  | -1.62709200 |
| C | -4.26534000 | -2.59824400 | -0.95847300 |
| H | -4.40396800 | -3.63739300 | -1.24451800 |
| H | -5.89488600 | 1.24373800  | 1.60301600  |
| H | -5.40428600 | 3.64263500  | 1.78722200  |
| C | -3.92821900 | 0.02412600  | -0.12557000 |
| C | -4.07628600 | 1.45513600  | 0.35530000  |
| C | -4.84246100 | 1.52538900  | 1.70685300  |
| C | -4.63468100 | 2.97266300  | 2.19154900  |
| C | -3.10650400 | -2.25581100 | -0.25187300 |
| C | -2.94453900 | -0.92013200 | 0.14128200  |
| C | -2.90371600 | 2.36587600  | 0.66259800  |
| C | -3.27200900 | 3.30748600  | 1.62786400  |
| H | -4.37013100 | 0.82850100  | 2.40826800  |
| O | -1.23265900 | 1.41501200  | -0.75530300 |
| H | -4.66913700 | 3.06441300  | 3.28130400  |

|   |             |             |             |
|---|-------------|-------------|-------------|
| C | -1.63357200 | 2.41549600  | 0.10305100  |
| C | -1.41739700 | -4.00465600 | -0.88937200 |
| C | -2.11680700 | -3.31115600 | 0.11254300  |
| C | -2.42083400 | 4.35257900  | 1.95964900  |
| O | -1.79835200 | -0.53282600 | 0.80605400  |
| C | 0.67310700  | 3.83141700  | -1.61360800 |
| C | -0.75914900 | 3.46832500  | 0.41033300  |
| H | -2.71020300 | 5.09184500  | 2.70109200  |
| C | -1.18364400 | 4.43791800  | 1.32487600  |
| C | -0.57471900 | -5.05410000 | -0.51902100 |
| H | 2.00109800  | 4.19029100  | -3.26388600 |
| C | -1.94520400 | -3.66287000 | 1.46400000  |
| H | -0.05427100 | -5.61116400 | -1.29678900 |
| C | 1.93563000  | 3.97677300  | -2.19838700 |
| C | 0.58084800  | 3.57583800  | -0.23465300 |
| H | -0.51353600 | 5.26281600  | 1.55104400  |
| C | -0.38104800 | -5.41134100 | 0.81235400  |
| C | -1.07498100 | -4.70183100 | 1.79050900  |
| C | 3.10947800  | 3.85550600  | -1.45437500 |
| C | 1.75029400  | 3.47840700  | 0.54184500  |
| H | -0.94722800 | -4.97203400 | 2.83724800  |
| C | 2.99140300  | 3.60974300  | -0.08530400 |
| H | 3.89542000  | 3.52823100  | 0.51833800  |
| C | 1.68078600  | 3.23089700  | 2.02858200  |
| H | 0.96839100  | 2.43042800  | 2.24686100  |
| H | 2.66132100  | 2.93686800  | 2.41091500  |
| H | 1.35920200  | 4.12996600  | 2.56517400  |
| C | 4.46256500  | 3.94205700  | -2.10934700 |
| H | 5.17850200  | 4.46909000  | -1.47130500 |
| H | 4.84649800  | 2.93182300  | -2.28859200 |
| H | 4.40762500  | 4.46610400  | -3.06744400 |
| C | -0.56478400 | 3.95771300  | -2.46545400 |
| H | -1.05577100 | 2.98515300  | -2.57935200 |
| H | -1.29059100 | 4.63702300  | -2.00748200 |
| H | -0.31389900 | 4.33712900  | -3.45934700 |
| C | -2.69540600 | -2.94571100 | 2.55842200  |
| H | -2.31047400 | -1.92907400 | 2.68911300  |
| H | -3.76125600 | -2.86499400 | 2.32165800  |
| H | -2.59298100 | -3.47748000 | 3.50809600  |
| C | 0.57211500  | -6.51664100 | 1.19075400  |
| H | 0.16099200  | -7.14561700 | 1.98626000  |
| H | 0.79637900  | -7.15878200 | 0.33354400  |
| H | 1.52105200  | -6.10767700 | 1.55899300  |
| C | -1.52383400 | -3.59901300 | -2.33833700 |

|   |             |             |             |
|---|-------------|-------------|-------------|
| H | -0.90791100 | -4.24960200 | -2.96709900 |
| H | -2.54920000 | -3.65317900 | -2.71391800 |
| H | -1.18406100 | -2.56216000 | -2.44510900 |
| C | 3.14427500  | 0.02918100  | -1.84383700 |
| C | 3.03845900  | -1.44757700 | -1.58712200 |
| C | 3.82742900  | -2.03173900 | -0.59052500 |
| C | 3.71698800  | -3.37811000 | -0.26853300 |
| C | 2.81512000  | -4.17183700 | -0.97143100 |
| C | 2.05051900  | -3.61551900 | -1.99173700 |
| C | 2.15145100  | -2.26154300 | -2.28910800 |
| N | 4.75211400  | -1.20793400 | 0.12721200  |
| N | 2.01477800  | 0.62387200  | -2.23417900 |
| O | 4.22100000  | 0.62632300  | -1.68258500 |
| H | 5.24876600  | -0.54780500 | -0.47328000 |
| H | 1.97594100  | 0.45285400  | 1.03927900  |
| H | 2.02960800  | 1.63352000  | -2.31873200 |
| H | 1.11724700  | 0.14884600  | -2.09259900 |
| H | 4.34773500  | -3.79498300 | 0.51085900  |
| H | 2.71669500  | -5.22500800 | -0.72732200 |
| H | 1.35724800  | -4.23266500 | -2.55066700 |
| H | 1.52379800  | -1.82820600 | -3.06005500 |
| C | 4.52561400  | -0.83114400 | 1.35997200  |
| O | 2.97844900  | 0.58681300  | 1.14611000  |
| H | 3.22386000  | 1.19960000  | 0.43777000  |
| C | 5.47366800  | 0.02416800  | 2.06506300  |
| C | 5.01859100  | 0.70983900  | 3.32484700  |
| C | 5.93024500  | -0.45692500 | 3.43742900  |
| H | 6.20277400  | 0.52571800  | 1.43890800  |
| H | 3.97096000  | 0.58996400  | 3.57665800  |
| H | 5.42092200  | 1.70140300  | 3.49698300  |
| H | 6.97472400  | -0.29312500 | 3.67565700  |
| H | 5.52506000  | -1.39776500 | 3.79500000  |
| H | 3.81622500  | -1.42125900 | 1.93201700  |

**1a-III**

|   |             |             |             |
|---|-------------|-------------|-------------|
| P | 0.09981200  | 0.32181000  | 0.00648300  |
| O | 0.52597600  | -0.48944600 | 1.22488000  |
| O | -0.70610400 | -0.34739200 | -1.05141500 |
| H | 0.47761000  | 5.30249500  | -3.36887500 |
| H | 0.25872600  | 6.28185500  | -1.92001600 |
| H | -2.37288200 | 4.92499400  | -3.09772700 |
| C | 0.40049600  | 5.25446100  | -2.27867400 |
| C | -2.02939700 | 4.27452300  | -2.29858800 |
| H | 2.45047300  | 5.29336100  | -1.43046200 |

|   |             |             |             |
|---|-------------|-------------|-------------|
| C | 1.62913300  | 4.59606000  | -1.62218200 |
| C | -0.72899600 | 4.35879300  | -1.82135500 |
| H | 2.00605100  | 3.79158700  | -2.26342800 |
| C | -2.89189000 | 3.33965500  | -1.73223300 |
| H | -3.92284800 | 3.27997300  | -2.06933900 |
| H | 0.58673700  | 6.00454800  | 0.39657400  |
| H | 3.00214800  | 5.85265200  | 0.82250000  |
| C | -0.29893000 | 3.52991400  | -0.78176800 |
| C | 1.07499000  | 3.96420600  | -0.31489300 |
| C | 0.96244900  | 5.05474100  | 0.78906800  |
| C | 2.37770900  | 5.14672600  | 1.38491000  |
| C | -2.46644400 | 2.44268800  | -0.74485400 |
| C | -1.14339300 | 2.54232600  | -0.29334000 |
| C | 2.07468400  | 3.02393700  | 0.32930500  |
| C | 2.88238900  | 3.73146500  | 1.22384000  |
| H | 0.26190700  | 4.70124200  | 1.55405800  |
| O | 1.42824300  | 0.96250400  | -0.69621900 |
| H | 2.37983400  | 5.47547900  | 2.42834400  |
| C | 2.30248000  | 1.66914300  | 0.11552700  |
| C | -4.02691200 | 0.49637600  | -1.02323200 |
| C | -3.43674000 | 1.45819700  | -0.18492600 |
| C | 3.96266100  | 3.11712900  | 1.84076300  |
| O | -0.65223400 | 1.63287000  | 0.63271100  |
| C | 4.21391600  | -0.80718400 | -0.78480400 |
| C | 3.39035500  | 1.02336200  | 0.72006200  |
| H | 4.59832500  | 3.66699900  | 2.52873500  |
| C | 4.21735400  | 1.77834600  | 1.56217400  |
| C | -5.02084600 | -0.33649100 | -0.50070100 |
| H | 5.09685600  | -2.39994300 | -1.91882300 |
| C | -3.83474000 | 1.55821400  | 1.16173600  |
| H | -5.49799000 | -1.06230100 | -1.15975400 |
| C | 4.72244800  | -2.09955600 | -0.94174500 |
| C | 3.75305300  | -0.40457100 | 0.47956200  |
| H | 5.07266200  | 1.28387300  | 2.01421700  |
| C | -5.43194700 | -0.25404700 | 0.82787700  |
| C | -4.82124500 | 0.69831900  | 1.64389200  |
| C | 4.77830500  | -3.00244900 | 0.11696200  |
| C | 3.77418500  | -1.31024300 | 1.55897700  |
| H | -5.13461700 | 0.78747900  | 2.68331200  |
| C | 4.28973600  | -2.59044800 | 1.35846800  |
| H | 4.30570700  | -3.28797400 | 2.19419800  |
| C | 3.24353100  | -0.92164800 | 2.91767000  |
| H | 2.30529100  | -0.37006100 | 2.81441300  |
| H | 3.06281200  | -1.81510600 | 3.52232800  |

|   |             |             |             |
|---|-------------|-------------|-------------|
| H | 3.94979400  | -0.28913800 | 3.46589800  |
| C | 5.29298800  | -4.40609200 | -0.07708000 |
| H | 5.84871800  | -4.49942700 | -1.01438500 |
| H | 5.95363200  | -4.70524600 | 0.74222500  |
| H | 4.46442300  | -5.12438100 | -0.10663000 |
| C | 4.19677400  | 0.13899000  | -1.95824300 |
| H | 3.16897500  | 0.34164200  | -2.27625600 |
| H | 4.65453500  | 1.09903400  | -1.69819800 |
| H | 4.74232800  | -0.28480900 | -2.80507400 |
| C | -3.23236300 | 2.59205100  | 2.07987900  |
| H | -2.19129400 | 2.34719400  | 2.31415800  |
| H | -3.23726200 | 3.58298300  | 1.61457600  |
| H | -3.79287100 | 2.64963200  | 3.01656200  |
| C | -6.52341700 | -1.14572200 | 1.36417700  |
| H | -6.31239600 | -1.46071800 | 2.39136400  |
| H | -7.48672800 | -0.62378500 | 1.37590200  |
| H | -6.64207000 | -2.04322300 | 0.75040100  |
| C | -3.59187600 | 0.33164300  | -2.46002800 |
| H | -3.96832500 | -0.61064400 | -2.86849600 |
| H | -3.96787000 | 1.14041000  | -3.09484900 |
| H | -2.49948900 | 0.32969700  | -2.52856900 |
| C | -2.23506700 | -3.75571800 | -1.30418000 |
| C | -0.73944100 | -3.93581200 | -1.42052000 |
| C | 0.18577000  | -3.42455000 | -0.50154200 |
| C | 1.55317500  | -3.47892900 | -0.75284200 |
| C | 2.01240400  | -4.11324700 | -1.90131800 |
| C | 1.10826400  | -4.69783300 | -2.78613200 |
| C | -0.25843400 | -4.60625100 | -2.54367500 |
| N | -0.22910100 | -2.80958700 | 0.71391600  |
| N | -2.63385600 | -2.49320200 | -1.03942800 |
| O | -2.99706000 | -4.70133100 | -1.44504000 |
| H | 0.21066200  | -1.77440900 | 0.98297700  |
| H | -3.62509400 | -2.31897100 | -0.98852400 |
| H | -1.99427800 | -1.69496300 | -1.05624600 |
| H | 2.24121500  | -3.03255200 | -0.04142100 |
| H | 3.07965200  | -4.14730800 | -2.09716600 |
| H | 1.46606000  | -5.20593500 | -3.67558200 |
| H | -0.98056000 | -5.03014100 | -3.23408600 |
| C | -1.22704600 | -3.22464600 | 1.40341700  |
| C | -1.76174100 | -2.47915300 | 2.52616700  |
| C | -3.28535300 | -2.42579300 | 2.58829600  |
| C | -2.54290200 | -3.23513900 | 3.58300100  |
| H | -1.21794500 | -1.58444400 | 2.80485700  |
| H | -3.82868400 | -2.93360600 | 1.79693000  |



|   |             |             |            |
|---|-------------|-------------|------------|
| H | -3.69495400 | -1.46423300 | 2.87471000 |
| H | -2.44649900 | -2.86137800 | 4.59560900 |
| H | -2.57775600 | -4.31639200 | 3.49709600 |
| H | -1.72054800 | -4.15575900 | 1.11270800 |

**H<sub>2</sub>O**

|   |            |             |             |
|---|------------|-------------|-------------|
| O | 0.00000000 | 0.00000000  | 0.11831700  |
| H | 0.00000000 | 0.75681600  | -0.47326700 |
| H | 0.00000000 | -0.75681600 | -0.47326700 |

**TS3**

|   |             |             |             |
|---|-------------|-------------|-------------|
| P | 0.11340400  | 0.30266500  | 0.14241500  |
| O | 0.56103100  | -0.43445900 | 1.37524500  |
| O | -0.69061000 | -0.41697700 | -0.90001900 |
| H | 0.31070900  | 5.16861600  | -3.47042600 |
| H | 0.04446000  | 6.18273900  | -2.05331200 |
| H | -2.50854500 | 4.65446100  | -3.22096100 |
| C | 0.23080500  | 5.15151300  | -2.37946500 |
| C | -2.14835200 | 4.05711300  | -2.38838500 |
| H | 2.27581600  | 5.30068400  | -1.53175400 |
| C | 1.48166200  | 4.56625400  | -1.69770900 |
| C | -0.86160900 | 4.22466500  | -1.89612400 |
| H | 1.88999600  | 3.75350700  | -2.30868300 |
| C | -2.97373300 | 3.10561900  | -1.79539400 |
| H | -3.99358900 | 2.97815300  | -2.14760300 |
| H | 0.40171700  | 6.00566800  | 0.28424400  |
| H | 2.82317900  | 5.95197900  | 0.69182600  |
| C | -0.40725000 | 3.46126100  | -0.81738700 |
| C | 0.95114500  | 3.96106700  | -0.36746500 |
| C | 0.81239200  | 5.08140000  | 0.70225000  |
| C | 2.23043700  | 5.23972500  | 1.28001400  |
| C | -2.52375000 | 2.27860300  | -0.75900900 |
| C | -1.21428700 | 2.46086700  | -0.29111900 |
| C | 1.98868800  | 3.07646900  | 0.29575200  |
| C | 2.78512300  | 3.83917000  | 1.15370000  |
| H | 0.13165800  | 4.72910600  | 1.48539400  |
| O | 1.39089700  | 0.96157000  | -0.64074400 |
| H | 2.23036800  | 5.59794900  | 2.31376400  |
| C | 2.25930600  | 1.72454200  | 0.12116400  |
| C | -4.00863600 | 0.26523500  | -0.97653100 |
| C | -3.46412200 | 1.28065400  | -0.17115000 |
| C | 3.89805400  | 3.28148800  | 1.76726400  |
| O | -0.69856800 | 1.62459900  | 0.68364500  |
| C | 4.21492000  | -0.70676100 | -0.76173400 |

|   |             |             |             |
|---|-------------|-------------|-------------|
| C | 3.38155200  | 1.13593800  | 0.72043300  |
| H | 4.52577000  | 3.87366900  | 2.42692500  |
| C | 4.19740200  | 1.94460100  | 1.52213800  |
| C | -4.99203000 | -0.57346600 | -0.44002200 |
| H | 5.08887400  | -2.30950000 | -1.88966300 |
| C | -3.89108300 | 1.42170200  | 1.16416200  |
| H | -5.42569100 | -1.34557000 | -1.07632800 |
| C | 4.73619700  | -1.99531000 | -0.90886400 |
| C | 3.77798500  | -0.28725400 | 0.50526800  |
| H | 5.07889900  | 1.49541400  | 1.97129200  |
| C | -5.43503100 | -0.44475200 | 0.87491800  |
| C | -4.86275300 | 0.55434800  | 1.66294800  |
| C | 4.83354400  | -2.87500300 | 0.16536300  |
| C | 3.83610900  | -1.17220400 | 1.60022700  |
| H | -5.19729700 | 0.67641000  | 2.69219000  |
| C | 4.36763200  | -2.44736800 | 1.41062300  |
| H | 4.41750400  | -3.12746100 | 2.25953700  |
| C | 3.32578300  | -0.76649200 | 2.96118400  |
| H | 2.34750300  | -0.28711000 | 2.86577500  |
| H | 3.22696100  | -1.64498000 | 3.60523100  |
| H | 4.00292500  | -0.06436800 | 3.45872800  |
| C | 5.37336800  | -4.27207300 | -0.01156100 |
| H | 5.86956400  | -4.38647600 | -0.97960000 |
| H | 6.09557900  | -4.52240300 | 0.77161900  |
| H | 4.56802900  | -5.01570200 | 0.04184800  |
| C | 4.15659900  | 0.21739700  | -1.95155000 |
| H | 3.11872000  | 0.39990500  | -2.24860300 |
| H | 4.60652100  | 1.18840200  | -1.72005100 |
| H | 4.68807700  | -0.21442500 | -2.80340000 |
| C | -3.33744100 | 2.50923500  | 2.04991700  |
| H | -2.29237700 | 2.30872800  | 2.30656200  |
| H | -3.36801300 | 3.48014800  | 1.54511400  |
| H | -3.91390300 | 2.58399900  | 2.97555400  |
| C | -6.52191900 | -1.33567500 | 1.42176900  |
| H | -6.35931000 | -1.56221000 | 2.48032700  |
| H | -7.50176000 | -0.85224900 | 1.33959800  |
| H | -6.57577300 | -2.28109100 | 0.87390500  |
| C | -3.53144300 | 0.03611900  | -2.39108900 |
| H | -3.79542800 | -0.97379000 | -2.72242400 |
| H | -3.98715800 | 0.74188100  | -3.09384000 |
| H | -2.44539400 | 0.15237400  | -2.45090900 |
| C | -2.06387800 | -3.49561300 | -1.38747200 |
| C | -0.60402000 | -3.81809100 | -1.48324000 |
| C | 0.31746700  | -3.50922600 | -0.46748000 |

|   |             |             |             |
|---|-------------|-------------|-------------|
| C | 1.67846400  | -3.70210800 | -0.67159700 |
| C | 2.12544000  | -4.23771800 | -1.87455600 |
| C | 1.21716900  | -4.60642500 | -2.86607300 |
| C | -0.14165200 | -4.39411400 | -2.66673400 |
| N | -0.11492200 | -2.95202600 | 0.76262100  |
| N | -2.37061000 | -2.46933700 | -0.48061400 |
| O | -2.91818600 | -4.10278100 | -1.99405100 |
| H | 0.31894200  | -2.03886500 | 1.04857500  |
| H | -3.36750000 | -2.28200900 | -0.42171200 |
| H | -1.79749900 | -1.59689600 | -0.61808200 |
| H | 2.37431100  | -3.41894100 | 0.11198600  |
| H | 3.19253700  | -4.36657500 | -2.03104200 |
| H | 1.56824700  | -5.03752300 | -3.79739600 |
| H | -0.87036400 | -4.63935400 | -3.43264800 |
| C | -1.35995700 | -3.14489200 | 1.17306400  |
| C | -1.89040900 | -2.35697800 | 2.28722200  |
| C | -3.33606700 | -2.54282800 | 2.66384000  |
| C | -2.28320000 | -3.13287600 | 3.53377300  |
| H | -1.43701100 | -1.38008200 | 2.41409200  |
| H | -3.93021100 | -3.21194300 | 2.04646700  |
| H | -3.85529100 | -1.65205700 | 2.99657800  |
| H | -2.05422000 | -2.65808800 | 4.48051000  |
| H | -2.14505300 | -4.20908000 | 3.51912800  |
| H | -1.78205000 | -4.13763200 | 1.01706400  |

**3aa+Cat.11**

|   |             |             |             |
|---|-------------|-------------|-------------|
| P | 0.23190200  | 0.32522700  | 0.26240700  |
| O | 0.45056300  | -0.53188300 | 1.44497700  |
| O | -0.72760700 | -0.19242400 | -0.86288600 |
| H | 1.40016300  | 5.12344700  | -3.34764000 |
| H | 1.37712000  | 6.11607500  | -1.89077300 |
| H | -1.45013200 | 5.19877100  | -3.08295500 |
| C | 1.33166400  | 5.08254000  | -2.25676900 |
| C | -1.22306400 | 4.51466100  | -2.27059600 |
| H | 3.37163600  | 4.74922400  | -1.45162000 |
| C | 2.43229500  | 4.21447400  | -1.62099200 |
| C | 0.07127300  | 4.39555800  | -1.78406800 |
| H | 2.64167800  | 3.35297300  | -2.26485600 |
| C | -2.22747800 | 3.73136800  | -1.70993300 |
| H | -3.24790300 | 3.81577300  | -2.07208700 |
| H | 1.73275200  | 5.78808200  | 0.43135600  |
| H | 4.09407300  | 5.19425400  | 0.75054100  |
| C | 0.35961800  | 3.52315800  | -0.73033700 |
| C | 1.80207900  | 3.69815400  | -0.29582300 |

|   |             |             |             |
|---|-------------|-------------|-------------|
| C | 1.94179500  | 4.78277100  | 0.80925600  |
| C | 3.37727900  | 4.60708000  | 1.33830600  |
| C | -1.96112800 | 2.79758100  | -0.70103900 |
| C | -0.64558600 | 2.70890100  | -0.22728100 |
| C | 2.63420100  | 2.58352800  | 0.30863400  |
| C | 3.60853200  | 3.12475200  | 1.15238800  |
| H | 1.22357200  | 4.56147800  | 1.60654500  |
| O | 1.53539300  | 0.66594800  | -0.62096900 |
| H | 3.48557400  | 4.91764500  | 2.38154700  |
| C | 2.59950100  | 1.21125800  | 0.10387600  |
| C | -3.76012400 | 1.09186400  | -1.06418800 |
| C | -3.06941900 | 1.94478800  | -0.18214700 |
| C | 4.59012300  | 2.31588100  | 1.70745700  |
| O | -0.32584600 | 1.76481800  | 0.74672300  |
| C | 3.86528000  | -1.59021100 | -0.89669300 |
| C | 3.57554600  | 0.36553800  | 0.64432600  |
| H | 5.35441100  | 2.73528600  | 2.35524600  |
| C | 4.57904300  | 0.95274200  | 1.42503300  |
| C | -4.86156000 | 0.37356400  | -0.58978900 |
| H | 4.23747200  | -3.33551800 | -2.08746800 |
| C | -3.47488500 | 2.04590800  | 1.16280100  |
| H | -5.37545600 | -0.30000100 | -1.27375900 |
| C | 4.02992500  | -2.96454900 | -1.08573900 |
| C | 3.60980200  | -1.10579900 | 0.39651900  |
| H | 5.35250200  | 0.30770900  | 1.83165800  |
| C | -5.28008500 | 0.45995800  | 0.73826200  |
| C | -4.56791400 | 1.29597300  | 1.59810200  |
| C | 3.95009700  | -3.86489300 | -0.02796700 |
| C | 3.49417400  | -2.00107500 | 1.47812800  |
| H | -4.88385300 | 1.38365600  | 2.63608000  |
| C | 3.67086700  | -3.36374800 | 1.24489500  |
| H | 3.58571500  | -4.05505500 | 2.08169500  |
| C | 3.17854500  | -1.51667000 | 2.87259400  |
| H | 2.36287000  | -0.78931300 | 2.85000100  |
| H | 2.87556700  | -2.35669200 | 3.50349300  |
| H | 4.04472400  | -1.04230400 | 3.34621300  |
| C | 4.11420600  | -5.34781800 | -0.24634200 |
| H | 4.49087300  | -5.56175300 | -1.25051200 |
| H | 4.81136200  | -5.78113200 | 0.47754100  |
| H | 3.15771000  | -5.87231300 | -0.12811800 |
| C | 3.99032600  | -0.65540800 | -2.07365100 |
| H | 3.01468900  | -0.24028900 | -2.34734600 |
| H | 4.65360800  | 0.18533900  | -1.84589100 |
| H | 4.39034600  | -1.18246200 | -2.94332700 |

|             |             |             |             |
|-------------|-------------|-------------|-------------|
| C           | -2.77473000 | 2.96651100  | 2.13122900  |
| H           | -1.80963000 | 2.55308900  | 2.44058600  |
| H           | -2.58095500 | 3.94372600  | 1.67798700  |
| H           | -3.38455300 | 3.11814300  | 3.02541400  |
| C           | -6.47811500 | -0.31705200 | 1.22326300  |
| H           | -6.45209700 | -0.45075500 | 2.30850200  |
| H           | -7.40913700 | 0.20456800  | 0.97511100  |
| H           | -6.52548900 | -1.30597000 | 0.75636600  |
| C           | -3.33207600 | 0.89909700  | -2.49996500 |
| H           | -3.65170700 | -0.08535200 | -2.85168200 |
| H           | -3.77711400 | 1.65478800  | -3.15738300 |
| H           | -2.24621600 | 0.96727600  | -2.60218300 |
| C           | -2.74526300 | -2.64705000 | -1.28784800 |
| C           | -1.56750700 | -3.52987700 | -1.44407000 |
| C           | -0.59622900 | -3.58823400 | -0.42471100 |
| C           | 0.64485200  | -4.17543300 | -0.70738200 |
| C           | 0.87978700  | -4.73326300 | -1.95192000 |
| C           | -0.11176100 | -4.74014400 | -2.94342200 |
| C           | -1.32436500 | -4.12607200 | -2.68761000 |
| N           | -0.86280900 | -3.08147000 | 0.84118800  |
| N           | -2.72288200 | -1.91504900 | -0.08615800 |
| O           | -3.59322900 | -2.45745000 | -2.13843400 |
| H           | -0.14918200 | -2.47704400 | 1.24156000  |
| H           | -3.59169500 | -1.41177300 | 0.07900700  |
| H           | -1.49113600 | -0.75178200 | -0.52473800 |
| H           | 1.40650400  | -4.18019700 | 0.06551100  |
| H           | 1.85093300  | -5.17753500 | -2.15520900 |
| H           | 0.08209100  | -5.19488400 | -3.90867000 |
| H           | -2.09732200 | -4.05070400 | -3.44598500 |
| C           | -2.22050600 | -2.66361000 | 1.08349200  |
| C           | -2.35950100 | -1.82436800 | 2.31962200  |
| C           | -3.67534900 | -1.84902200 | 3.04425400  |
| C           | -2.47347700 | -2.52268300 | 3.64121400  |
| H           | -1.81489400 | -0.88613800 | 2.29357900  |
| H           | -4.46457800 | -2.48018000 | 2.64366700  |
| H           | -4.02045200 | -0.92051500 | 3.48490200  |
| H           | -1.99409800 | -2.05991300 | 4.49576200  |
| H           | -2.44394800 | -3.60780400 | 3.63603000  |
| H           | -2.83340000 | -3.57256000 | 1.19950200  |
| <b>TS3'</b> |             |             |             |
| P           | 0.48262400  | -0.12388000 | -0.07920300 |
| O           | -0.53578000 | -0.26805600 | 1.00799000  |
| O           | 0.23983300  | 0.84653900  | -1.20493800 |

|   |             |             |             |
|---|-------------|-------------|-------------|
| H | 5.55759100  | -2.09520800 | -2.83997600 |
| H | 6.33779300  | -2.11765600 | -1.25890400 |
| H | 5.94446900  | 0.73210900  | -2.67184900 |
| C | 5.37730800  | -1.96751400 | -1.76851100 |
| C | 5.13620300  | 0.63077000  | -1.95333000 |
| H | 4.68601200  | -3.91179100 | -0.95332300 |
| C | 4.30067500  | -2.92421600 | -1.22518200 |
| C | 4.79411300  | -0.61208900 | -1.43957100 |
| H | 3.51402600  | -3.05900500 | -1.97579100 |
| C | 4.41588300  | 1.74849600  | -1.54042000 |
| H | 4.67568600  | 2.73316000  | -1.91908600 |
| H | 5.65837400  | -2.32793300 | 1.00429800  |
| H | 4.71723300  | -4.57548300 | 1.31583800  |
| C | 3.75845100  | -0.74187400 | -0.50913800 |
| C | 3.69337300  | -2.17217400 | -0.00710100 |
| C | 4.59212400  | -2.38856700 | 1.24333100  |
| C | 4.15889200  | -3.76053300 | 1.79404000  |
| C | 3.33225700  | 1.64149800  | -0.66205400 |
| C | 3.00668000  | 0.37360200  | -0.16001400 |
| C | 2.41024200  | -2.82568800 | 0.46516200  |
| C | 2.69541300  | -3.80898600 | 1.41623400  |
| H | 4.36100500  | -1.60678700 | 1.97550300  |
| O | 0.81666100  | -1.56206500 | -0.78691100 |
| H | 4.31512900  | -3.85346400 | 2.87293300  |
| C | 1.09751700  | -2.61342000 | 0.06741300  |
| C | 1.85318900  | 3.58894300  | -1.23860200 |
| C | 2.57843800  | 2.86707700  | -0.27069000 |
| C | 1.69182900  | -4.63794500 | 1.89845400  |
| O | 1.90586500  | 0.22221000  | 0.66640100  |
| C | -1.72227600 | -3.38933600 | -1.22145000 |
| C | 0.06080900  | -3.42844400 | 0.54518600  |
| H | 1.91240500  | -5.41214700 | 2.62780900  |
| C | 0.38948100  | -4.45332600 | 1.43956000  |
| C | 1.22611100  | 4.77645400  | -0.86274700 |
| H | -3.33476200 | -3.33184200 | -2.63313500 |
| C | 2.65678800  | 3.33971800  | 1.04999300  |
| H | 0.66014900  | 5.32965500  | -1.61020000 |
| C | -3.05371300 | -3.19707000 | -1.59047400 |
| C | -1.35306000 | -3.21579900 | 0.12427800  |
| H | -0.40734500 | -5.10124900 | 1.79415300  |
| C | 1.32038800  | 5.28291700  | 0.43338600  |
| C | 2.03313600  | 4.54704600  | 1.37752100  |
| C | -4.03118700 | -2.84769600 | -0.66144900 |
| C | -2.32268800 | -2.86223000 | 1.07951600  |

|   |             |             |             |
|---|-------------|-------------|-------------|
| H | 2.12194300  | 4.92604400  | 2.39482900  |
| C | -3.64515500 | -2.69349900 | 0.66883100  |
| H | -4.39804400 | -2.43043300 | 1.41073200  |
| C | -1.95694100 | -2.61788400 | 2.52378500  |
| H | -1.09080500 | -1.95198900 | 2.58364600  |
| H | -2.79820200 | -2.15562800 | 3.05266400  |
| H | -1.71131400 | -3.54358800 | 3.05383800  |
| C | -5.45835700 | -2.62655300 | -1.09043700 |
| H | -6.13591900 | -2.62507200 | -0.23173900 |
| H | -5.56758800 | -1.66207800 | -1.59957300 |
| H | -5.78762300 | -3.40464600 | -1.78614500 |
| C | -0.71063100 | -3.78750000 | -2.26660200 |
| H | -0.06663400 | -2.94046500 | -2.52366700 |
| H | -0.06518900 | -4.59480800 | -1.90668300 |
| H | -1.21168200 | -4.12585700 | -3.17715800 |
| C | 3.42128500  | 2.58020100  | 2.10540700  |
| H | 2.91574400  | 1.63985600  | 2.34984300  |
| H | 4.42805600  | 2.32663800  | 1.75828100  |
| H | 3.51175900  | 3.17279000  | 3.01974000  |
| C | 0.66134400  | 6.59180800  | 0.79064100  |
| H | -0.41419500 | 6.56340100  | 0.58192600  |
| H | 0.79557400  | 6.83068800  | 1.84993600  |
| H | 1.08233200  | 7.41696600  | 0.20682500  |
| C | 1.74515300  | 3.10686500  | -2.66382900 |
| H | 0.91892400  | 3.61149500  | -3.17227000 |
| H | 2.66118400  | 3.31790900  | -3.22690900 |
| H | 1.56235800  | 2.03075000  | -2.69178100 |
| C | -3.12936500 | 1.53374500  | -1.57206600 |
| C | -4.35789700 | 1.10143500  | -0.83288100 |
| C | -4.31285400 | 0.60990400  | 0.48634000  |
| C | -5.50648000 | 0.24774100  | 1.11163600  |
| C | -6.71991900 | 0.35939100  | 0.44019800  |
| C | -6.76255600 | 0.82228300  | -0.87356000 |
| C | -5.57843600 | 1.18262900  | -1.50453300 |
| N | -3.08548600 | 0.60352900  | 1.19460700  |
| N | -2.05329800 | 1.98788700  | -0.77364100 |
| O | -3.02795000 | 1.47869900  | -2.77094400 |
| H | -3.20487000 | 0.38707000  | 2.17906600  |
| H | -2.30553300 | 0.01885800  | 0.84539000  |
| H | -1.07501300 | 1.63370700  | -1.05648700 |
| H | -5.47709200 | -0.13011300 | 2.13040200  |
| H | -7.63614000 | 0.07325200  | 0.94706800  |
| H | -7.70793400 | 0.89647900  | -1.39953800 |
| H | -5.57028100 | 1.54167800  | -2.52897800 |

|   |             |            |            |
|---|-------------|------------|------------|
| C | -2.25110600 | 2.36819900 | 0.48825300 |
| H | -3.21441600 | 2.81918500 | 0.71733600 |
| C | -1.10613300 | 2.76627400 | 1.30314800 |
| C | -1.30210400 | 3.98304600 | 2.19780300 |
| C | -1.19231200 | 2.63449700 | 2.80416600 |
| H | -0.12940500 | 2.61910500 | 0.85315600 |
| H | -2.27784300 | 4.45909900 | 2.17902200 |
| H | -0.45881000 | 4.65776700 | 2.26704700 |
| H | -0.26511900 | 2.34707000 | 3.28650700 |
| H | -2.08636800 | 2.17900000 | 3.21604900 |

**TScat.14(Re)**

|   |             |             |             |
|---|-------------|-------------|-------------|
| P | 0.02687100  | 0.57137600  | 0.14646700  |
| O | 0.67119700  | -0.05197400 | 1.35676600  |
| O | -0.69433900 | -0.29485700 | -0.84066100 |
| H | -0.77689500 | 5.69924700  | -3.15157400 |
| H | -1.08324700 | 6.53079500  | -1.62757400 |
| H | -3.46350700 | 4.73447000  | -2.78997300 |
| C | -0.77345600 | 5.57307400  | -2.06487200 |
| C | -2.95492100 | 4.12452300  | -2.04905600 |
| H | 1.28791100  | 5.95139800  | -1.33709700 |
| C | 0.59446900  | 5.12476700  | -1.51870700 |
| C | -1.67822900 | 4.44969300  | -1.61327900 |
| H | 1.06575200  | 4.43266900  | -2.22555400 |
| C | -3.56974900 | 2.98769600  | -1.53226100 |
| H | -4.56896600 | 2.71714500  | -1.86154300 |
| H | -0.55688300 | 6.21497500  | 0.64226800  |
| H | 1.86894400  | 6.53783600  | 0.85087900  |
| C | -1.04218500 | 3.67646200  | -0.63825900 |
| C | 0.25414000  | 4.34188300  | -0.21812100 |
| C | 0.03268600  | 5.34534600  | 0.94818200  |
| C | 1.45464600  | 5.69736900  | 1.42207600  |
| C | -2.92135500 | 2.13823300  | -0.62677200 |
| C | -1.64587200 | 2.51368700  | -0.17792000 |
| C | 1.46331200  | 3.58510100  | 0.30200200  |
| C | 2.21076900  | 4.41916700  | 1.13925600  |
| H | -0.50815800 | 4.83006700  | 1.74985800  |
| O | 1.11693900  | 1.44293100  | -0.70613500 |
| H | 1.49302900  | 5.97722900  | 2.47904100  |
| C | 1.91776100  | 2.30032500  | 0.02828800  |
| C | -3.99665900 | -0.06640900 | -1.17774800 |
| C | -3.60019800 | 0.87695000  | -0.19927300 |
| C | 3.45603500  | 4.02118000  | 1.60254000  |
| O | -0.96909100 | 1.73122900  | 0.73800900  |



|   |             |             |             |
|---|-------------|-------------|-------------|
| C | 4.11368400  | 0.15254600  | -1.10286600 |
| C | 3.16672900  | 1.86342300  | 0.49272700  |
| H | 4.05137000  | 4.67470400  | 2.23367800  |
| C | 3.93225000  | 2.76299300  | 1.24487500  |
| C | -4.76264500 | -1.16586000 | -0.78564100 |
| H | 5.17612900  | -1.26906700 | -2.31339400 |
| C | -3.92326500 | 0.65317100  | 1.15441000  |
| H | -5.08519700 | -1.87331500 | -1.54805000 |
| C | 4.87172000  | -1.00655000 | -1.30125000 |
| C | 3.74703600  | 0.51274000  | 0.20810200  |
| H | 4.91861000  | 2.44633200  | 1.56866100  |
| C | -5.10186800 | -1.40275300 | 0.54818500  |
| C | -4.64912900 | -0.49240500 | 1.49971500  |
| C | 5.27223700  | -1.82334300 | -0.24934200 |
| C | 4.07264300  | -0.34648100 | 1.28487500  |
| H | -4.91443200 | -0.65338000 | 2.54370700  |
| C | 4.84153600  | -1.48390100 | 1.03467900  |
| H | 5.11521500  | -2.12346900 | 1.87188200  |
| C | 3.61206000  | -0.08485300 | 2.71409300  |
| H | 2.88319800  | 0.72954300  | 2.68925100  |
| C | 6.14816700  | -3.03886700 | -0.48870600 |
| H | 6.28041700  | -3.13742000 | -1.57470300 |
| C | 3.73317900  | 0.97345700  | -2.32495400 |
| H | 3.21283700  | 1.87441100  | -1.99244000 |
| C | -3.59641500 | 1.65013100  | 2.25772200  |
| H | -3.06161100 | 2.49392100  | 1.81706900  |
| C | -5.96667100 | -2.58831200 | 0.93927900  |
| H | -6.01517900 | -2.60970900 | 2.03635000  |
| C | -3.62845100 | 0.04908200  | -2.65336000 |
| H | -2.98377600 | 0.92110300  | -2.78161200 |
| C | -1.67236900 | -3.52150100 | -1.06611700 |
| C | -0.21283700 | -3.54109500 | -1.39961300 |
| C | 0.77420400  | -3.07857800 | -0.51312700 |
| C | 2.09869300  | -2.98169000 | -0.91977300 |
| C | 2.45269100  | -3.38386800 | -2.20377200 |
| C | 1.49258100  | -3.89418600 | -3.07686000 |
| C | 0.16456400  | -3.96963600 | -2.67212600 |
| N | 0.43296200  | -2.64373800 | 0.79207400  |
| N | -2.02372600 | -2.56951100 | -0.09394100 |
| O | -2.47581700 | -4.29125600 | -1.54415300 |
| H | 0.70099100  | -1.65484700 | 1.03420400  |
| H | -3.02362700 | -2.55193300 | 0.08655700  |
| H | -1.64108500 | -1.61948200 | -0.30466600 |
| H | 2.83721300  | -2.59086800 | -0.22553200 |

|   |             |             |             |
|---|-------------|-------------|-------------|
| H | 3.48967800  | -3.29389900 | -2.51573600 |
| H | 1.77496200  | -4.21376500 | -4.07413200 |
| H | -0.61114400 | -4.33035500 | -3.34035800 |
| C | -0.67717100 | -3.07901300 | 1.36907100  |
| C | -1.16778700 | -2.42099900 | 2.58142400  |
| C | -2.47321400 | -2.88729600 | 3.16674400  |
| C | -1.20274600 | -3.26153200 | 3.84633400  |
| H | -0.89374700 | -1.37643100 | 2.67518000  |
| H | -3.01037000 | -3.66270800 | 2.62779300  |
| H | -3.10133800 | -2.12366500 | 3.60979800  |
| H | -0.92336800 | -2.75101800 | 4.76049100  |
| H | -0.86544900 | -4.29055000 | 3.77709100  |
| H | -0.92658900 | -4.13151700 | 1.23326700  |
| C | -4.88170400 | 0.24168800  | -3.51836900 |
| H | -4.60139900 | 0.39658000  | -4.56524900 |
| H | -5.52781700 | -0.64240300 | -3.47417900 |
| H | -5.47568400 | 1.10094700  | -3.19155300 |
| C | -2.82788700 | -1.16671000 | -3.14127000 |
| H | -3.36755200 | -2.10642100 | -2.97567000 |
| H | -2.64162000 | -1.07655100 | -4.21713400 |
| H | -1.85977700 | -1.21081200 | -2.63457300 |
| C | -5.38561500 | -3.92521300 | 0.46382800  |
| H | -6.04562900 | -4.75191600 | 0.74574700  |
| H | -5.26159600 | -3.95005100 | -0.62366600 |
| H | -4.40173600 | -4.12233500 | 0.90413000  |
| C | -7.39312900 | -2.40676200 | 0.40518600  |
| H | -7.39283700 | -2.39463600 | -0.69028800 |
| H | -8.03888900 | -3.22743400 | 0.73424200  |
| H | -7.82462700 | -1.46345000 | 0.75177100  |
| C | -4.88358700 | 2.20566200  | 2.88208200  |
| H | -5.52758300 | 2.65406600  | 2.11954000  |
| H | -5.45533700 | 1.41832400  | 3.38545600  |
| H | -4.64466000 | 2.97263600  | 3.62612500  |
| C | -2.68616000 | 1.04119600  | 3.32899000  |
| H | -3.17573000 | 0.19561800  | 3.82812600  |
| H | -1.74328400 | 0.70484200  | 2.88823300  |
| H | -2.45450500 | 1.78585300  | 4.09785200  |
| C | 2.76723700  | 0.18197300  | -3.21561800 |
| H | 3.25368000  | -0.71612400 | -3.61581500 |
| H | 1.88067900  | -0.12714900 | -2.65370500 |
| H | 2.44346000  | 0.79387500  | -4.06440200 |
| C | 4.96798400  | 1.42825700  | -3.11202900 |
| H | 4.66814800  | 2.06530100  | -3.95061300 |
| H | 5.65369800  | 1.99645300  | -2.47600500 |

|   |            |             |             |
|---|------------|-------------|-------------|
| H | 5.51828900 | 0.57584700  | -3.52469200 |
| C | 2.90103000 | -1.30731300 | 3.30966100  |
| H | 3.59541600 | -2.14011200 | 3.46998800  |
| H | 2.46850500 | -1.04661300 | 4.28165200  |
| H | 2.09349300 | -1.64857200 | 2.65948900  |
| C | 4.78218100 | 0.30950400  | 3.62579200  |
| H | 5.52794400 | -0.49313700 | 3.66394600  |
| H | 5.28700900 | 1.21607200  | 3.28279800  |
| H | 4.42691600 | 0.48564600  | 4.64671800  |
| C | 5.50371900 | -4.33019500 | 0.02781100  |
| H | 5.36494800 | -4.29079300 | 1.11376400  |
| H | 4.52388600 | -4.50103600 | -0.42885400 |
| H | 6.14125000 | -5.19227100 | -0.19425000 |
| C | 7.53315400 | -2.84002100 | 0.13893000  |
| H | 7.44994700 | -2.74106300 | 1.22698500  |
| H | 8.18337300 | -3.69509200 | -0.07373700 |
| H | 8.01216600 | -1.93465600 | -0.24459800 |

**TScat.14(Si)**

|   |             |             |             |
|---|-------------|-------------|-------------|
| P | 0.26747300  | 0.51152400  | 0.30395400  |
| O | -0.46904900 | -0.22237900 | -0.77595800 |
| O | 0.79146800  | -0.24684000 | 1.49407400  |
| H | 2.34052700  | 5.05952700  | 3.52530500  |
| H | 2.87025400  | 5.90751700  | 2.07497700  |
| H | 4.75590500  | 3.52683300  | 3.00477300  |
| C | 2.32182900  | 5.02678600  | 2.43185500  |
| C | 4.09550300  | 3.10101300  | 2.25483700  |
| H | 0.44418400  | 5.98027300  | 1.73097100  |
| C | 0.88793300  | 4.98851500  | 1.86246200  |
| C | 2.92251000  | 3.74742700  | 1.89049000  |
| H | 0.23891600  | 4.40661800  | 2.52576200  |
| C | 4.41649800  | 1.88971300  | 1.64390900  |
| H | 5.34653200  | 1.38912500  | 1.89398400  |
| H | 2.36533100  | 5.85974800  | -0.17043900 |
| H | 0.10737800  | 6.79613700  | -0.48897500 |
| C | 2.09421200  | 3.20739700  | 0.90233400  |
| C | 1.03467800  | 4.22442000  | 0.51924800  |
| C | 1.59459600  | 5.19211800  | -0.56673900 |
| C | 0.35621800  | 5.92429100  | -1.10769800 |
| C | 3.54974400  | 1.26704800  | 0.73887900  |
| C | 2.37485700  | 1.94747900  | 0.39326100  |
| C | -0.29124000 | 3.84816800  | -0.11919900 |
| C | -0.70524100 | 4.85612800  | -0.99471100 |
| H | 2.04298000  | 4.59173900  | -1.36645600 |

|   |             |             |             |
|---|-------------|-------------|-------------|
| O | -0.64295900 | 1.72633900  | 0.90835700  |
| H | 0.48499100  | 6.28145400  | -2.13362200 |
| C | -1.07399300 | 2.70944400  | 0.03751600  |
| C | 4.09796200  | -1.17337000 | 1.03830800  |
| C | 3.88329500  | -0.07568100 | 0.17170100  |
| C | -1.92294800 | 4.76698200  | -1.65380000 |
| O | 1.46644700  | 1.32983700  | -0.44734000 |
| C | -3.78706300 | 0.89482900  | 0.49667300  |
| C | -2.27482300 | 2.55747900  | -0.67155500 |
| H | -2.25610300 | 5.55894400  | -2.31825600 |
| C | -2.69586700 | 3.62428800  | -1.47645800 |
| C | 4.56393300  | -2.37491200 | 0.50406200  |
| H | -5.23900600 | -0.46860800 | 1.29692300  |
| C | 4.05217400  | -0.24926300 | -1.21829100 |
| H | 4.75609100  | -3.21209200 | 1.17419800  |
| C | -4.70125000 | -0.15757500 | 0.40145500  |
| C | -3.10938000 | 1.31596900  | -0.66307100 |
| H | -3.64447200 | 3.52568300  | -1.99570300 |
| C | 4.79066400  | -2.54985800 | -0.86074700 |
| C | 4.49351600  | -1.48453600 | -1.70472800 |
| C | -4.99704800 | -0.78497600 | -0.80946500 |
| C | -3.29715200 | 0.61185000  | -1.87284100 |
| H | 4.63606400  | -1.59667900 | -2.77659200 |
| C | -4.25103600 | -0.40809300 | -1.92463100 |
| H | -4.42133600 | -0.91035500 | -2.87302800 |
| C | -2.50447400 | 0.91106000  | -3.14085100 |
| H | -1.73140500 | 1.64485900  | -2.89673400 |
| C | -6.14377200 | -1.78096700 | -0.87947100 |
| H | -6.00255600 | -2.50623200 | -0.06701100 |
| C | -3.59860700 | 1.56987000  | 1.84598700  |
| H | -2.90482200 | 2.40493200  | 1.72243500  |
| C | 3.81293900  | 0.85323600  | -2.24014300 |
| H | 3.49818000  | 1.75802300  | -1.71709300 |
| C | 5.40051000  | -3.84590600 | -1.36657600 |
| H | 5.07196600  | -4.64842600 | -0.69057500 |
| C | 3.82124200  | -1.11521600 | 2.53504100  |
| H | 3.28540900  | -0.18609000 | 2.74519100  |
| C | -2.89706500 | -3.07060500 | -0.01133400 |
| C | -2.81893400 | -2.95953800 | 1.47590700  |
| C | -1.60893300 | -2.71997400 | 2.14435400  |
| C | -1.59002800 | -2.59075500 | 3.53227200  |
| C | -2.76976700 | -2.73030700 | 4.25251700  |
| C | -3.97062900 | -3.01865800 | 3.59971700  |
| C | -3.99008100 | -3.13569700 | 2.21689900  |

|   |             |             |             |
|---|-------------|-------------|-------------|
| N | -0.40544300 | -2.60184900 | 1.41709900  |
| N | -1.81811200 | -2.50161500 | -0.73324800 |
| O | -3.75333800 | -3.71165200 | -0.57523200 |
| H | 0.12643300  | -1.69244200 | 1.52867300  |
| H | -1.92739000 | -2.68524000 | -1.72812800 |
| H | -1.56237800 | -1.49507700 | -0.58890500 |
| H | -0.64348600 | -2.39251700 | 4.02523600  |
| H | -2.75113900 | -2.62723200 | 5.33269700  |
| H | -4.88503700 | -3.14445100 | 4.16924100  |
| H | -4.90907300 | -3.35456900 | 1.68252600  |
| C | -0.28448800 | -3.23208000 | 0.24147800  |
| H | -0.70031900 | -4.23924600 | 0.19580000  |
| C | 0.93773000  | -3.00180000 | -0.54064600 |
| C | 1.74971300  | -4.24239300 | -0.86312300 |
| C | 1.03535600  | -3.51683300 | -1.95078800 |
| H | 1.48649700  | -2.09551300 | -0.30592200 |
| H | 1.34876000  | -5.19920900 | -0.54342500 |
| H | 2.82311800  | -4.13738300 | -0.77194100 |
| H | 1.61049600  | -2.89652900 | -2.63037900 |
| H | 0.15727400  | -3.98736700 | -2.38409600 |
| C | -3.40310800 | 1.49462300  | -4.23951800 |
| H | -4.17484500 | 0.77381000  | -4.53316900 |
| H | -3.90925200 | 2.40656800  | -3.91058500 |
| H | -2.81271600 | 1.73448100  | -5.13007300 |
| C | -1.78219600 | -0.33728100 | -3.66790200 |
| H | -2.49249800 | -1.13115900 | -3.93077900 |
| H | -1.22232400 | -0.08786200 | -4.57605700 |
| H | -1.07337100 | -0.70592000 | -2.92215800 |
| C | -4.91883200 | 2.14559000  | 2.37294400  |
| H | -4.75107500 | 2.68258800  | 3.31240400  |
| H | -5.36010500 | 2.84117300  | 1.65253000  |
| H | -5.65042300 | 1.35387000  | 2.56844900  |
| C | -2.98058300 | 0.59447800  | 2.85236600  |
| H | -3.63213300 | -0.27410400 | 3.00545100  |
| H | -2.00649900 | 0.24048600  | 2.50096500  |
| H | -2.83427500 | 1.08202800  | 3.82260400  |
| C | -6.21233300 | -2.56262700 | -2.18985000 |
| H | -5.27404900 | -3.08453200 | -2.39294500 |
| H | -7.01232200 | -3.30734200 | -2.13714400 |
| H | -6.43722600 | -1.89636000 | -3.03078200 |
| C | -7.47336900 | -1.05060800 | -0.63622800 |
| H | -7.47385200 | -0.52044500 | 0.32068500  |
| H | -7.64582600 | -0.31246600 | -1.42718700 |
| H | -8.30956500 | -1.75786000 | -0.63978600 |

|   |            |             |             |
|---|------------|-------------|-------------|
| C | 2.69133300 | 0.46221700  | -3.21143500 |
| H | 2.98816200 | -0.39659300 | -3.82579600 |
| H | 1.77609700 | 0.20734800  | -2.66859200 |
| H | 2.46992400 | 1.29276100  | -3.89035300 |
| C | 5.10220100 | 1.19824000  | -2.99687800 |
| H | 4.92466500 | 2.02751000  | -3.68966700 |
| H | 5.89781600 | 1.49171100  | -2.30522200 |
| H | 5.46271000 | 0.34626300  | -3.58347700 |
| C | 6.93104000 | -3.76436300 | -1.27563100 |
| H | 7.30233700 | -2.96155600 | -1.92205300 |
| H | 7.25336100 | -3.54834400 | -0.25290400 |
| H | 7.39256700 | -4.70473600 | -1.59524300 |
| C | 4.97256400 | -4.21981700 | -2.78715700 |
| H | 5.34480700 | -5.21667600 | -3.04245200 |
| H | 3.88302900 | -4.22204500 | -2.89715800 |
| H | 5.38644200 | -3.52053200 | -3.52129300 |
| C | 2.91325500 | -2.26884200 | 2.97965400  |
| H | 3.43051200 | -3.23374900 | 2.92834500  |
| H | 2.60152400 | -2.11742400 | 4.01896300  |
| H | 2.01868900 | -2.32264800 | 2.35654900  |
| C | 5.11970900 | -1.14701000 | 3.35262900  |
| H | 5.78840100 | -0.31922900 | 3.10205700  |
| H | 4.89824100 | -1.09308000 | 4.42386900  |
| H | 5.66567400 | -2.07984700 | 3.16936600  |

## 2. Compound characterization

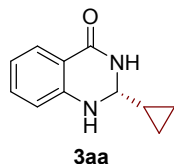

**(R)-2-cyclopropyl-2,3-dihydroquinazolin-4(1H)-one (3aa).** White solid, yield 90%; m.p. 205-206 °C; <sup>1</sup>H NMR(600 MHz, CDCl<sub>3</sub>): δ 7.88 (d, *J* = 7.5 Hz, 1H), 7.30 (t, *J* = 7.2 Hz, 1H), 6.85 (t, *J* = 7.5 Hz, 1H), 6.67 (d, *J* = 8.0 Hz, 1H), 6.16 (s, 1H), 4.01 (d, *J* = 8.8 Hz, 1H), 1.38 - 1.27 (m, 1H), 0.69 (d, *J* = 4.5 Hz, 2H), 0.38 (d, *J* = 4.5 Hz, 2H). <sup>13</sup>C NMR(150 MHz, CDCl<sub>3</sub>): δ 165.1, 147.4, 133.9, 128.6, 119.3, 115.7, 114.4, 71.2, 15.8, 2.3, 1.6. HRMS (m/z) calcd for C<sub>11</sub>H<sub>13</sub>N<sub>2</sub>O[M+H]<sup>+</sup> 189.1028, found 189.1039; [α]<sub>D</sub><sup>25</sup> = - 265 (c = 0.20, CHCl<sub>3</sub>); The *ee* was determined by HPLC analysis (Chiralpak AD-RH, CH<sub>3</sub>CN/H<sub>2</sub>O = 70/30, v/v, 1.0mL/min, 254nm, t<sub>R</sub> (minor) = 4.9min, t<sub>R</sub> (major) = 6.3 min), 92% *ee*.

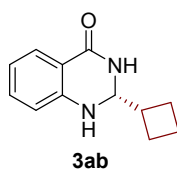

**(R)-2-cyclobutyl-2,3-dihydroquinazolin-4(1H)-one (3ab).** White solid, yield 98%; m.p. 149~151 °C; <sup>1</sup>H NMR(600 MHz, CDCl<sub>3</sub>): δ 7.87 (dd, *J* = 7.8, 1.4 Hz, 1H), 7.36 - 7.25 (m, 1H), 6.94 - 6.76 (m, 1H), 6.65 (d, *J* = 8.1 Hz, 1H), 6.29 (s, 1H), 4.86 - 4.74 (m, 1H), 4.17 (s, 1H), 2.83 - 2.64 (m, 1H), 2.21 - 2.06 (m, 2H), 2.07 - 1.95 (m, 1H), 1.94 - 1.81 (m, 3H). <sup>13</sup>C NMR(150 MHz, CDCl<sub>3</sub>): δ 165.2, 147.3, 133.8, 128.5, 119.2, 115.8, 114.6, 69.3, 39.1, 23.2, 23.0, 17.9. HRMS (m/z) calcd for C<sub>12</sub>H<sub>15</sub>N<sub>2</sub>O[M+H]<sup>+</sup> 203.1184, found 203.1184; [α]<sub>D</sub><sup>25</sup> = - 185 (c = 0.20, CHCl<sub>3</sub>); The *ee* was determined by HPLC analysis (Chiralpak OD-RH, CH<sub>3</sub>CN/H<sub>2</sub>O = 65/35, v/v, 1.0mL/min, 254nm, t<sub>R</sub> (minor) = 5.7 min, t<sub>R</sub> (major) = 6.3 min), 93% *ee*.

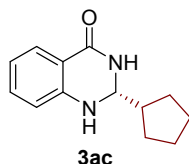

**(R)-2-cyclopentyl-2,3-dihydroquinazolin-4(1H)-one (3ac).** White solid, yield 98%; m.p. 181~182 °C; <sup>1</sup>H NMR(600 MHz, CDCl<sub>3</sub>): δ 7.87 (dd, *J* = 7.8, 1.4 Hz, 1H), 7.30 (ddd, *J* = 8.1, 7.3, 1.6 Hz, 1H), 6.85 (td, *J* = 7.8, 0.6Hz, 1H), 6.67 (dd, *J* = 7.8, 0.6 Hz, 1H), 6.16 (s, 1H), 4.65 (d, *J* = 7.7 Hz, 1H), 2.39 - 2.21 (m, 1H), 1.97 - 1.82 (m, 2H), 1.76 - 1.58 (m, 4H), 1.42 - 1.29 (m, 2H). <sup>13</sup>C NMR(150 MHz, CDCl<sub>3</sub>): δ 165.3, 147.4, 133.9, 128.6, 119.3, 115.7, 114.6, 69.8, 44.6, 28.1, 27.8, 25.5 (2). HRMS (m/z) calcd for C<sub>13</sub>H<sub>17</sub>N<sub>2</sub>O[M+H]<sup>+</sup> 217.1341, found 217.1321; [α]<sub>D</sub><sup>25</sup> = - 180 (c = 0.20, CHCl<sub>3</sub>); The *ee* was determined by HPLC analysis (Chiralpak OD-RH, CH<sub>3</sub>CN/H<sub>2</sub>O = 65/35, v/v, 1.0mL/min, 254nm, t<sub>R</sub> (minor) = 7.8 min, t<sub>R</sub> (major) = 9.3 min), 94% *ee*.

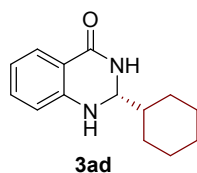

**(R)-2-cyclohexyl-2,3-dihydroquinazolin-4(1H)-one (3ad).** White solid, **yield 98% (small-scale), yield 97% (Gram-scale)**; m.p. 180~182 °C; <sup>1</sup>H NMR(600 MHz, CDCl<sub>3</sub>): δ 7.86 (dd, *J* = 7.8, 1.4 Hz, 1H), 7.30 (ddd, *J* = 8.1, 7.3, 1.6 Hz, 1H), 6.90 - 6.76 (m, 1H), 6.65 (dd, *J* = 8.1, 0.4 Hz, 1H), 6.24 (s, 1H), 4.66 (dd, *J* = 5.2, 1.1 Hz, 2H), 1.89 - 1.77 (m, 4H), 1.75 - 1.62 (m, 2H), 1.41 - 0.92 (m, 5H). <sup>13</sup>C NMR(150 MHz, CDCl<sub>3</sub>): δ 165.3, 147.4, 134.1, 128.5, 119.1, 115.3, 114.5, 69.6, 42.6, 27.6, 27.5, 26.1, 25.7, 25.6. HRMS (m/z) calcd for C<sub>14</sub>H<sub>19</sub>N<sub>2</sub>O[M+H]<sup>+</sup> 231.14974, found 231.1493; [α]<sub>D</sub><sup>25</sup> = -126 (c = 0.20, CHCl<sub>3</sub>); The *ee* was determined by HPLC analysis (Chiralpak OD-RH, CH<sub>3</sub>CN/H<sub>2</sub>O = 60/40, v/v, 1.0mL/min, 254nm, t<sub>R</sub> (minor) = 7.1 min, t<sub>R</sub> (major) = 8.4 min), 96% *ee*.

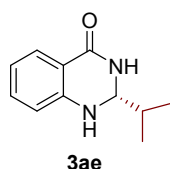

**(R)-2-isopropyl-2,3-dihydroquinazolin-4(1H)-one (3ae).** White solid, **yield 98% (small-scale), yield 95% (Gram-scale)**; m.p. 172~174 °C; <sup>1</sup>H NMR(600 MHz, CDCl<sub>3</sub>): δ 7.87 (dd, *J* = 7.8, 1.5 Hz, 1H), 7.31 (ddd, *J* = 8.1, 7.3, 1.6 Hz, 1H), 6.91 - 6.80 (m, 1H), 6.71 - 6.59 (m, 1H), 6.26 (s, 1H), 4.71 (d, *J* = 4.8 Hz, 1H), 2.05 - 1.91 (m, 1H), 1.06 (d, *J* = 6.6 Hz, 3H), 1.06 (d, *J* = 6.6 Hz, 3H). <sup>13</sup>C NMR(150 MHz, CDCl<sub>3</sub>): δ 165.4, 147.4, 134.2, 128.5, 119.2, 115.1, 114.5, 70.2, 32.8, 17.0, 16.8. HRMS (m/z) calcd for C<sub>11</sub>H<sub>15</sub>N<sub>2</sub>O[M+H]<sup>+</sup> 191.1184, found 191.1189; [α]<sub>D</sub><sup>25</sup> = -197 (c = 0.20, CHCl<sub>3</sub>); The *ee* was determined by HPLC analysis (Chiralpak OD-RH, CH<sub>3</sub>CN/H<sub>2</sub>O = 75/25, v/v, 1.0mL/min, 254nm, t<sub>R</sub> (minor) = 7.6 min, t<sub>R</sub> (major) = 9.1 min), 91% *ee*.

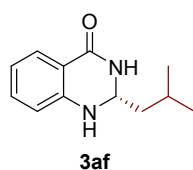

**(R)-2-isobutyl-2,3-dihydroquinazolin-4(1H)-one (3af).** White solid, **yield 99%**; m.p. 174~176 °C; <sup>1</sup>H NMR(600 MHz, CDCl<sub>3</sub>): δ 7.88 (d, *J* = 7.7 Hz, 1H), 7.34 - 7.27 (m, 1H), 6.86 (t, *J* = 7.5 Hz, 1H), 6.68 (d, *J* = 8.1 Hz, 1H), 6.38 (s, 1H), 4.93 (t, *J* = 6.3 Hz, 1H), 4.17 (s, 1H), 1.90 - 1.75 (m, 1H), 1.73 - 1.59 (m, 2H), 0.99 (d, *J* = 2.1 Hz, 3H), 0.97 (d, *J* = 2.1 Hz, 3H). <sup>13</sup>C NMR(150 MHz, CDCl<sub>3</sub>): δ 165.4, 147.4, 133.8, 128.6, 119.4, 116.2, 114.9, 63.6, 44.4, 23.9, 22.6, 22.5. HRMS (m/z) calcd for C<sub>12</sub>H<sub>17</sub>N<sub>2</sub>O[M+H]<sup>+</sup> 205.1341, found 205.1342; [α]<sub>D</sub><sup>25</sup> = -202 (c = 0.20, CHCl<sub>3</sub>); The *ee* was determined by HPLC analysis (Chiralpak OD-RH, CH<sub>3</sub>CN/H<sub>2</sub>O = 70/30, v/v, 1.0mL/min, 254nm, t<sub>R</sub> (minor) = 9.6 min, t<sub>R</sub> (major) = 11.0 min), 94% *ee*.

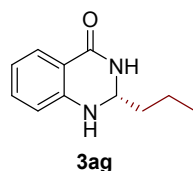

**(R)-2-propyl-2,3-dihydroquinazolin-4(1H)-one (3ag).** White solid, **yield 97% (small-scale), yield 95% (Gram-scale)**; m.p. 119~121 °C; <sup>1</sup>H NMR(600 MHz, CDCl<sub>3</sub>): δ 7.88 (d, *J* = 7.8 Hz, 1H), 7.30 (t, *J* = 7.7 Hz, 1H), 6.85 (t, *J* = 7.5 Hz, 1H), 6.67 (d, *J* = 8.1 Hz, 1H), 6.34 (s, 1H), 4.88 (t, *J* = 5.8 Hz, 1H), 4.22 (s, 1H), 1.78 (dd, *J* = 14.2, 7.1 Hz, 2H), 1.49 - 1.32 (m, 4H), 0.94 (t, *J* = 7.0 Hz, 3H). <sup>13</sup>C NMR(150 MHz, CDCl<sub>3</sub>): δ 165.4, 147.4, 133.8, 128.6, 119.4, 116.2, 114.9, 63.6, 44.4, 23.9, 22.6, 22.5.



HRMS (m/z) calcd for C<sub>12</sub>H<sub>17</sub>N<sub>2</sub>O[M+H]<sup>+</sup> 205.1341, found 205.1342; [ $\alpha$ ]<sub>D</sub><sup>25</sup> = - 195 (c = 0.20, CHCl<sub>3</sub>); The *ee* was determined by HPLC analysis (Chiralpak OD-RH, CH<sub>3</sub>CN/H<sub>2</sub>O = 65/35, v/v, 1.0mL/min, 254nm, t<sub>R</sub> (minor) = 7.6 min, t<sub>R</sub> (major) = 8.4 min), 91% *ee*.

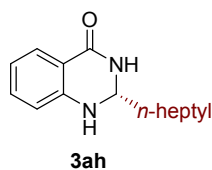

**(R)-2-heptyl-2,3-dihydroquinazolin-4(1H)-one (3ah).** White solid, yield 98%; m.p. 133~135 °C; <sup>1</sup>H NMR(600 MHz, CDCl<sub>3</sub>): 7.88 (dd, *J* = 7.8, 1.5 Hz, 1H), 7.31 (td, *J* = 8.2, 1.6 Hz, 1H), 6.90 - 6.82 (m, 1H), 6.68 (d, *J* = 8.0 Hz, 1H), 6.22 (s, 1H), 4.89 (t, *J* = 5.8 Hz, 1H), 1.78 (td, *J* = 7.9, 6.0 Hz, 2H), 1.51 - 1.39 (m, 2H), 1.40 - 1.20 (m, 8H), 0.89 (t, *J* = 7.0 Hz, 3H). <sup>13</sup>C NMR(150 MHz, CDCl<sub>3</sub>):  $\delta$  165.4, 147.4, 134.0, 128.6, 119.5, 115.7, 114.8, 65.4, 35.5, 31.7, 29.2, 29.1, 24.0, 22.6, 14.1. HRMS (m/z) calcd for C<sub>15</sub>H<sub>23</sub>N<sub>2</sub>O[M+H]<sup>+</sup> 247.1810, found 247.1809; [ $\alpha$ ]<sub>D</sub><sup>25</sup> = - 165 (c = 0.20, CHCl<sub>3</sub>); The *ee* was determined by HPLC analysis (Chiralpak OD-RH, CH<sub>3</sub>CN/H<sub>2</sub>O = 50/50, v/v, 1.0mL/min, 254nm, t<sub>R</sub> (minor) = 8.6 min, t<sub>R</sub> (major) = 10.0 min), 92% *ee*.

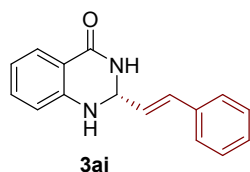

**(R,E)-2-styryl-2,3-dihydroquinazolin-4(1H)-one (3ai).** White solid, yield 98% (small-scale), yield 96% (Gram-scale); m.p. 155~156 °C; <sup>1</sup>H NMR(600 MHz, CDCl<sub>3</sub>): 7.92 (dd, *J* = 7.8, 1.2 Hz, 1H), 7.41 (d, *J* = 7.2 Hz, 2H), 7.36 - 7.30 (m, 4H), 6.88 (t, *J* = 7.5 Hz, 1H), 6.74 (d, *J* = 15.8 Hz, 1H), 6.68 (d, *J* = 8.0 Hz, 1H), 6.37 (dd, *J* = 15.8, 7.8 Hz, 1H), 6.07 (s, 1H), 5.48 (d, *J* = 7.8 Hz, 1H), 4.36 (s, 1H). <sup>13</sup>C NMR(150 MHz, CDCl<sub>3</sub>):  $\delta$  165.4, 146.9, 135.2, 135.0, 134.0, 128.9, 128.8 (2), 128.6, 127.0 (2), 126.0, 119.6, 115.5, 114.7, 67.9. HRMS (m/z) calcd for C<sub>16</sub>H<sub>15</sub>N<sub>2</sub>O[M+H]<sup>+</sup> 251.1184, found 251.1186; [ $\alpha$ ]<sub>D</sub><sup>25</sup> = - 208 (c = 0.20, CHCl<sub>3</sub>); The *ee* was determined by HPLC analysis (Chiralpak OD-RH, CH<sub>3</sub>CN/H<sub>2</sub>O = 65/35, v/v, 1.0mL/min, 254nm, t<sub>R</sub> (minor) = 8.0 min, t<sub>R</sub> (major) = 8.6 min), 96% *ee*.

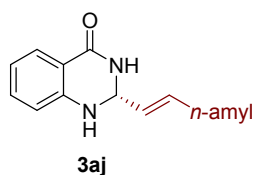

**(R,E)-2-(hept-1-en-1-yl)-2,3-dihydroquinazolin-4(1H)-one (3aj).** White solid, yield 95%; m.p. 116~118 °C; <sup>1</sup>H NMR(600 MHz, CDCl<sub>3</sub>):  $\delta$  7.88 (d, *J* = 7.8 Hz, 1H), 7.38 - 7.27 (m, 1H), 6.86 (t, *J* = 7.5 Hz, 1H), 6.65 (d, *J* = 8.1 Hz, 1H), 6.01 - 5.83 (m, 2H), 5.76 - 5.58 (m, 1H), 5.27 (d, *J* = 7.7 Hz, 1H), 4.21 (s, 1H), 2.08 (dd, *J* = 14.5, 7.1 Hz, 2H), 1.48 - 1.36 (m, 2H), 1.35 - 1.24 (m, 4H), 0.89 (t, *J* = 7.0 Hz, 3H). <sup>13</sup>C NMR(150 MHz, CDCl<sub>3</sub>):  $\delta$  164.9, 147.2, 138.2, 133.9, 128.6, 127.2, 119.4, 115.5, 114.6, 67.8, 31.9, 31.3, 28.3, 22.4, 14.0. HRMS (m/z) calcd for C<sub>15</sub>H<sub>21</sub>N<sub>2</sub>O[M+H]<sup>+</sup> 245.1654, found 245.1651; [ $\alpha$ ]<sub>D</sub><sup>25</sup> = - 123 (c = 0.20, CHCl<sub>3</sub>); The *ee* was determined by HPLC analysis (Chiralpak OD-RH, CH<sub>3</sub>CN/H<sub>2</sub>O = 65/35, v/v, 1.0mL/min, 254nm, t<sub>R</sub> (minor) = 7.429 min, t<sub>R</sub> (major) = 8.985 min), 91% *ee*.

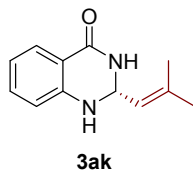

**(R)-2-(2-methylprop-1-en-1-yl)-2,3-dihydroquinazolin-4(1H)-one (3ak).** White solid, yield 95% (small-scale), yield 90% (Gram-scale); m.p. 146~148 °C; <sup>1</sup>H NMR(600 MHz, CDCl<sub>3</sub>): δ 7.89 (dd, *J* = 7.8, 1.1 Hz, 1H), 7.42 - 7.27 (m, 1H), 6.86 (t, *J* = 7.5 Hz, 1H), 6.66 (d, *J* = 8.0 Hz, 1H), 5.76 (s, 1H), 5.59 (d, *J* = 8.4 Hz, 1H), 5.43 (dd, *J* = 8.3, 1.1 Hz, 1H), 4.16 (s, 1H), 1.80 (s, 3H), 1.75 (s, 3H). <sup>13</sup>C NMR(150 MHz, CDCl<sub>3</sub>): δ 165.3, 147.7, 140.9, 133.8, 128.6, 122.1, 119.4, 115.9, 114.7, 63.0, 25.8, 18.4. HRMS (m/z) calcd for C<sub>12</sub>H<sub>15</sub>N<sub>2</sub>O[M+H]<sup>+</sup> 203.1184, found 203.1181; [α]<sub>D</sub><sup>25</sup> = - 256 (c = 0.20, CHCl<sub>3</sub>); The *ee* was determined by HPLC analysis (Chiralpak OD-RH, CH<sub>3</sub>CN/H<sub>2</sub>O = 70/30, v/v, 1.0mL/min, 254nm, t<sub>R</sub> (minor) = 7.9 min, t<sub>R</sub> (major) = 9.0 min), 87% *ee*.

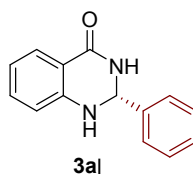

**(R)-2-phenyl-2,3-dihydroquinazolin-4(1H)-one (3al).** White solid, yield 95%; m.p. 228~230 °C; <sup>1</sup>H NMR(600 MHz, CDCl<sub>3</sub>): δ 7.94 (dd, *J* = 7.8, 1.3 Hz, 1H), 7.59 (dd, *J* = 6.6, 2.8 Hz, 2H), 7.46 - 7.44(m, 3H), 7.34 (td, *J* = 8.1, 1.4 Hz, 1H), 6.90 (t, *J* = 7.5 Hz, 1H), 6.67 (d, *J* = 8.0 Hz, 1H), 5.90 (s, 1H), 5.88 (s, 1H). <sup>13</sup>C NMR(150 MHz, CDCl<sub>3</sub>): δ 164.8, 147.2, 138.5, 134.0, 130.2, 129.1 (2), 128.7, 127.4 (2), 119.7, 115.6, 114.6, 69.1. HRMS (m/z) calcd for C<sub>14</sub>H<sub>13</sub>N<sub>2</sub>O[M+H]<sup>+</sup> 225.1028, found 225.1021; [α]<sub>D</sub><sup>25</sup> = - 250 (c = 0.20, CHCl<sub>3</sub>); The *ee* was determined by HPLC analysis (Chiralpak OD-RH, CH<sub>3</sub>CN/H<sub>2</sub>O = 65/35, v/v, 1.0mL/min, 254nm, t<sub>R</sub> (minor) = 8.1 min, t<sub>R</sub> (major) = 8.9 min), 89% *ee*.

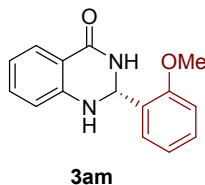

**(R)-2-(2-methoxyphenyl)-2,3-dihydroquinazolin-4(1H)-one (3am).** White solid, yield 95%; m.p. 170~172 °C; <sup>1</sup>H NMR(600 MHz, CDCl<sub>3</sub>): δ 7.90 (dd, *J* = 7.8, 1.4 Hz, 1H), 7.54 (dd, *J* = 7.6, 1.6 Hz, 1H), 7.36 - 7.32 (m, 1H), 7.30 (ddd, *J* = 8.1, 7.3, 1.6 Hz, 1H), 6.98 (td, *J* = 7.5, 0.6 Hz, 1H), 6.93 (d, *J* = 8.3 Hz, 1H), 6.87 - 6.81 (m, 1H), 6.70 - 6.61 (m, 1H), 6.25 (d, *J* = 2.2 Hz, 1H), 6.15 (s, 1H), 3.89 (s, 3H). <sup>13</sup>C NMR(150 MHz, CDCl<sub>3</sub>): δ 165.0, 156.4, 147.1, 134.1, 130.3, 128.6, 127.7, 126.7, 121.0, 119.2, 114.6, 110.6, 62.5, 55.5. HRMS (m/z) calcd for C<sub>15</sub>H<sub>15</sub>N<sub>2</sub>O<sub>2</sub>[M+H]<sup>+</sup> 255.1134, found 255.1126; [α]<sub>D</sub><sup>25</sup> = - 179 (c = 0.20, CHCl<sub>3</sub>); The *ee* was determined by HPLC analysis (Chiralpak OD-RH, CH<sub>3</sub>CN/H<sub>2</sub>O = 65/35, v/v, 1.0mL/min, 254nm, t<sub>R</sub> (minor) = 8.1 min, t<sub>R</sub> (major) = 8.9 min), 89% *ee*.

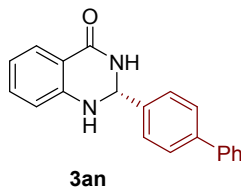

**(R)-2-([1,1'-biphenyl]-4-yl)-2,3-dihydroquinazolin-4(1H)-one (3an).** White solid, yield 90%; m.p. 178~180 °C; <sup>1</sup>H NMR(600 MHz, CDCl<sub>3</sub>): δ 7.96 (dd, *J* = 7.8, 1.2 Hz, 1H), 7.66 (s, 4H), 7.60 (d, *J* = 7.9 Hz, 2H), 7.47 (t, *J* = 7.6 Hz, 2H), 7.39 (dd, *J* = 10.9, 3.8 Hz, 1H), 7.35 (t, *J* = 7.7 Hz, 1H), 6.92 (s, 1H), 6.69 (d, *J* = 8.0 Hz, 1H), 5.96 (s, 2H), 3.91 (s, 1H). <sup>13</sup>C NMR(150 MHz, CDCl<sub>3</sub>): δ 164.8, 147.2, 143.2, 140.1, 137.3, 134.2, 134.1, 128.9, 128.7, 127.9, 127.8 (2), 127.2 (2), 119.7, 115.5, 114.6, 68.8. HRMS (m/z) calcd for C<sub>20</sub>H<sub>17</sub>N<sub>2</sub>O[M+H]<sup>+</sup> 301.1341, found 301.1332; [α]<sub>D</sub><sup>25</sup> = -165 (c = 0.20, CHCl<sub>3</sub>); The *ee* was determined by HPLC analysis (Chiralpak OD-RH, CH<sub>3</sub>CN/H<sub>2</sub>O = 40/60, v/v, 1.0mL/min, 254nm, t<sub>R</sub> (minor) = 6.0 min, t<sub>R</sub> (major) = 8.4 min), 82% *ee*.

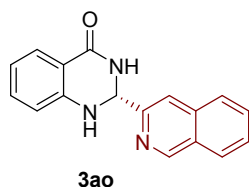

**(R)-2-(isoquinolin-3-yl)-2,3-dihydroquinazolin-4(1H)-one (3ao).** White solid, yield 87%; m.p. 155~156 °C; <sup>1</sup>H NMR(600 MHz, CDCl<sub>3</sub>): δ 8.35 - 8.25 (m, 1H), 8.17 (d, *J* = 8.4 Hz, 1H), 7.98 - 7.88 (m, 1H), 7.87 (d, *J* = 8.0 Hz, 1H), 7.84 - 7.73 (m, 2H), 7.62 (ddd, *J* = 8.1, 7.0, 1.1 Hz, 1H), 7.33 (ddd, *J* = 8.1, 7.4, 1.6 Hz, 1H), 6.95 (s, 1H), 6.91 - 6.84 (m, 1H), 6.81 - 6.73 (m, 1H), 6.18 (d, *J* = 1.9 Hz, 1H), 5.36 (s, 1H). <sup>13</sup>C NMR(150 MHz, CDCl<sub>3</sub>): δ 164.5, 157.7, 146.4, 139.0, 134.2, 130.9, 128.6 (2), 128.0, 127.8 (2), 127.7, 119.9, 118.0, 116.1, 115.5, 68.0. HRMS (m/z) calcd for C<sub>17</sub>H<sub>14</sub>N<sub>3</sub>O[M+H]<sup>+</sup> 276.1137, found 276.1126; [α]<sub>D</sub><sup>25</sup> = -251 (c = 0.20, CHCl<sub>3</sub>); The *ee* was determined by HPLC analysis (Chiralpak OD-RH, CH<sub>3</sub>CN/H<sub>2</sub>O = 65/35, v/v, 1.0mL/min, 254nm, t<sub>R</sub> (minor) = 8.5 min, t<sub>R</sub> (major) = 9.0 min), 83% *ee*.

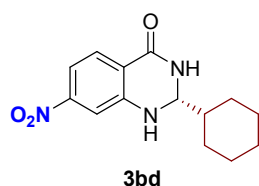

**(R)-2-cyclohexyl-7-nitro-2,3-dihydroquinazolin-4(1H)-one (3bd).** White solid, yield 70%; m.p. 226~227 °C; <sup>1</sup>H NMR(600 MHz, CDCl<sub>3</sub>): δ 8.01 (d, *J* = 8.0 Hz, 1H), 7.60 (d, *J* = 7.9 Hz, 1H), 7.51 (s, 1H), 6.36 (s, 1H), 4.74 (s, 1H), 1.93 - 1.63 (m, 6H), 1.22 - 1.04 (m, 5H). <sup>13</sup>C NMR(150 MHz, CDCl<sub>3</sub>): δ 163.1, 151.4, 147.6, 130.0, 119.7, 113.1, 109.3, 69.6, 43.1, 29.7, 27.4, 27.3, 26.0, 25.6. HRMS (m/z) calcd for C<sub>14</sub>H<sub>18</sub>N<sub>3</sub>O<sub>3</sub>[M+H]<sup>+</sup> 276.1348, found 276.1343; [α]<sub>D</sub><sup>25</sup> = -150 (c = 0.20, CHCl<sub>3</sub>); The *ee* was determined by HPLC analysis (Chiralpak OD-RH, CH<sub>3</sub>CN/H<sub>2</sub>O = 50/50, v/v, 1.0mL/min, 254nm, t<sub>R</sub> (minor) = 6.4 min, t<sub>R</sub> (major) = 7.0 min), 78% *ee*.

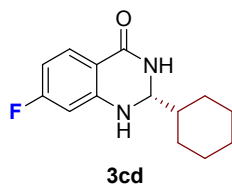

**(R)-2-cyclohexyl-7-fluoro-2,3-dihydroquinazolin-4(1H)-one (3cd).** White solid, yield 99%; m.p. 213~215 °C; <sup>1</sup>H NMR(600 MHz, CDCl<sub>3</sub>): δ 7.85 (dd, *J* = 8.6, 6.4 Hz, 1H), 6.50 (td, *J* = 8.6, 2.2 Hz, 1H), 6.39 (s, 1H), 6.33 (dd, *J* = 10.0, 2.3 Hz, 1H), 4.65 (d, *J* = 5.0 Hz, 1H), 4.41 (s, 1H), 1.89 - 1.57 (m, 6H), 1.32 - 1.01 (m, 5H). <sup>13</sup>C NMR(150 MHz, CDCl<sub>3</sub>): 166.6 (d, *J* = 215.6 Hz), 164.5, 149.1 (d, *J* = 12.1 Hz), 131.1 (d, *J* = 11.3 Hz), 111.8, 106.5 (d, *J* = 22.7 Hz), 100.8 (d, *J* = 25.2 Hz), 69.6, 42.8, 27.4,

27.3, 26.1, 25.7, 25.6. HRMS (m/z) calcd for C<sub>14</sub>H<sub>18</sub>N<sub>2</sub>O[M+H]<sup>+</sup> 249.1403, found 249.1409; [α]<sub>D</sub><sup>25</sup> = -108 (c = 0.20, CHCl<sub>3</sub>); The *ee* was determined by HPLC analysis (Chiralpak OD-RH, CH<sub>3</sub>CN/H<sub>2</sub>O = 60/40, v/v, 1.0mL/min, 254nm, t<sub>R</sub> (minor) = 8.4 min, t<sub>R</sub> (major) = 10.0 min), 92% *ee*.

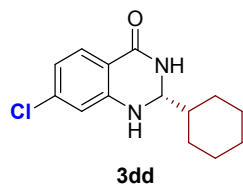

**(R)-7-chloro-2-cyclohexyl-2,3-dihydroquinazolin-4(1H)-one (3dd).** White solid, yield 86%; m.p. 197~199 °C; <sup>1</sup>H NMR(600 MHz, CDCl<sub>3</sub>): δ 7.78 (d, *J* = 8.3 Hz, 1H), 6.77 (dd, *J* = 8.3, 1.8 Hz, 1H), 6.66 (d, *J* = 1.7 Hz, 1H), 6.40 (s, 1H), 4.64 (d, *J* = 5.0 Hz, 1H), 4.32 (s, 1H), 1.89 - 1.57 (m, 6H), 1.31 - 0.99 (m, 5H). <sup>13</sup>C NMR(150 MHz, CDCl<sub>3</sub>): δ 164.4, 148.1, 139.8, 129.9, 119.3, 114.1, 69.6, 42.9, 27.5, 27.4, 26.1, 25.7, 25.6. HRMS (m/z) calcd for C<sub>14</sub>H<sub>18</sub>ClN<sub>2</sub>O[M+H]<sup>+</sup> 265.1108, found 265.1116; [α]<sub>D</sub><sup>25</sup> = -100 (c = 0.20, CHCl<sub>3</sub>); The *ee* was determined by HPLC analysis (Chiralpak OD-RH, CH<sub>3</sub>CN/H<sub>2</sub>O = 50/50, v/v, 1.0mL/min, 254nm, t<sub>R</sub> (minor) = 6.7min, t<sub>R</sub> (major) = 8.1 min), 89% *ee*.

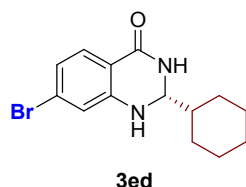

**(R)-7-bromo-2-cyclohexyl-2,3-dihydroquinazolin-4(1H)-one (3ed).** White solid, yield 92%; m.p. 219~220 °C; <sup>1</sup>H NMR(600 MHz, CDCl<sub>3</sub>): δ 7.70 (d, *J* = 8.3 Hz, 1H), 6.93 (d, *J* = 8.0 Hz, 1H), 6.83 (s, 1H), 6.47 (s, 1H), 4.64 (d, *J* = 4.7 Hz, 1H), 4.37 (s, 1H), 1.86 - 1.57 (m, 6H), 1.28 - 1.04 (m, 5H). <sup>13</sup>C NMR(150 MHz, CDCl<sub>3</sub>): δ 164.5, 148.1, 130.0, 128.3, 122.1, 117.1, 69.6, 42.9, 27.4, 27.3, 26.1, 25.7, 25.6. HRMS (m/z) calcd for C<sub>14</sub>H<sub>18</sub>BrN<sub>2</sub>O [M+H]<sup>+</sup> 309.0603, found 309.0582; [α]<sub>D</sub><sup>25</sup> = -133 (c = 0.20, CHCl<sub>3</sub>); The *ee* was determined by HPLC analysis (Chiralpak OD-RH, CH<sub>3</sub>CN/H<sub>2</sub>O = 50/50, v/v, 1.0mL/min, 254nm, t<sub>R</sub> (minor) = 7.8 min, t<sub>R</sub> (major) = 9.4 min), 85% *ee*.

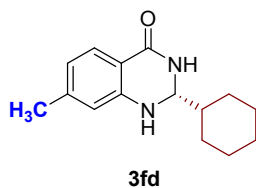

**(R)-2-cyclohexyl-7-methyl-2,3-dihydroquinazolin-4(1H)-one (3fd).** White solid, yield 99%; m.p. 190~192 °C; <sup>1</sup>H NMR(600 MHz, CDCl<sub>3</sub>): δ 7.75 (d, *J* = 7.9 Hz, 1H), 6.65 (dd, *J* = 7.9, 0.7 Hz, 1H), 6.46 (s, 1H), 6.13 (s, 1H), 4.68 - 4.54 (m, 1H), 4.19 (s, 1H), 2.29 (s, 3H), 1.89 - 1.59 (m, 6H), 1.33 - 1.03 (m, 5H). <sup>13</sup>C NMR(150 MHz, CDCl<sub>3</sub>): δ 165.4, 147.4, 144.8, 128.5, 120.4, 114.8, 113.2, 69.7, 42.6, 27.6, 27.5, 26.2, 25.8, 25.7, 21.8. HRMS (m/z) calcd for C<sub>15</sub>H<sub>21</sub>N<sub>2</sub>O[M+H]<sup>+</sup> 245.1654, found 245.1666; [α]<sub>D</sub><sup>25</sup> = -90 (c = 0.20, CHCl<sub>3</sub>); The *ee* was determined by HPLC analysis (Chiralpak OD-RH, CH<sub>3</sub>CN/H<sub>2</sub>O = 50/50, v/v, 1.0mL/min, 254nm, t<sub>R</sub> (minor) = 5.3 min, t<sub>R</sub> (major) = 6.9 min), 82% *ee*.

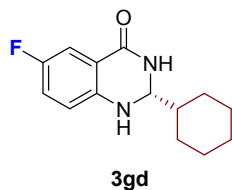

**(R)-2-cyclohexyl-6-fluoro-2,3-dihydroquinazolin-4(1H)-one (3gd).** White solid, yield 91%; m.p. 174~176 °C; <sup>1</sup>H NMR(600 MHz, CDCl<sub>3</sub>): δ 7.55 (dd, *J* = 8.7, 3.0 Hz, 1H), 7.02 (td, *J* = 8.5, 3.0 Hz, 1H), 6.74 (s, 1H), 6.63 (dd, *J* = 8.8, 4.2 Hz, 1H), 4.60 (d, *J* = 5.0 Hz, 1H), 4.19 (s, 1H), 1.87 - 1.58 (m, 6H), 1.32 - 1.04 (m, 5H). <sup>13</sup>C NMR(150 MHz, CDCl<sub>3</sub>): δ 164.5, 156.3 (d, *J* = 237.8 Hz), 143.7 (d, *J* = 1.4 Hz), 121.1 (d, *J* = 23.7 Hz), 116.9 (d, *J* = 7.0 Hz), 116.1 (d, *J* = 7.1 Hz), 114.1 (d, *J* = 23.6 Hz). 69.7, 42.4, 27.6, 27.5, 26.1, 25.7, 25.6. HRMS (m/z) calcd for C<sub>14</sub>H<sub>18</sub>FN<sub>2</sub>O[M+H]<sup>+</sup> 249.1403, found 249.1401; [α]<sub>D</sub><sup>25</sup> = - 138 (c = 0.20, CHCl<sub>3</sub>); The *ee* was determined by HPLC analysis (Chiralpak AS-RH, CH<sub>3</sub>CN/H<sub>2</sub>O = 60/40, v/v, 1.0mL/min, 254nm, t<sub>R</sub> (minor) = 10.5 min, t<sub>R</sub> (major) = 13.2 min), 94% *ee*.

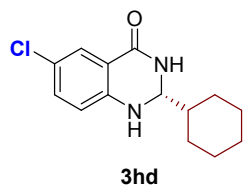

**(R)-6-chloro-2-cyclohexyl-2,3-dihydroquinazolin-4(1H)-one (3hd).** White solid, yield 99%; m.p. 198~200 °C; <sup>1</sup>H NMR(600 MHz, CDCl<sub>3</sub>): δ 7.83 (s, 1H), 7.22 (d, *J* = 8.4 Hz, 1H), 6.60 (d, *J* = 8.4 Hz, 1H), 6.40 (s, 1H), 4.63 (d, *J* = 3.0 Hz, 1H), 4.28 (s, 1H), 1.84 - 1.64 (m, 6H), 1.27 - 1.07 (m, 5H). <sup>13</sup>C NMR(150 MHz, CDCl<sub>3</sub>): δ 164.1, 145.8, 133.7, 128.0, 124.0, 116.7, 115.9, 69.5, 42.7, 27.5, 27.4, 26.1, 24.7, 25.7. HRMS (m/z) calcd for C<sub>14</sub>H<sub>18</sub>ClN<sub>2</sub>O[M+H]<sup>+</sup> 265.1108, found 265.1109; [α]<sub>D</sub><sup>25</sup> = - 150 (c = 0.20, CHCl<sub>3</sub>); The *ee* was determined by HPLC analysis (Chiralpak OD-RH, CH<sub>3</sub>CN/H<sub>2</sub>O = 50/50, v/v, 1.0mL/min, 254nm, t<sub>R</sub> (minor) = 6.6 min, t<sub>R</sub> (major) = 7.6 min), 97% *ee*.

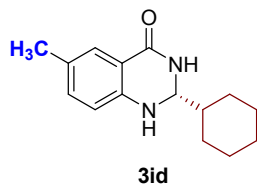

**(R)-2-cyclohexyl-6-methyl-2,3-dihydroquinazolin-4(1H)-one (3id).** White solid, yield 99%; m.p. 194~195 °C; <sup>1</sup>H NMR(600 MHz, CDCl<sub>3</sub>): δ 7.68 (d, *J* = 1.1 Hz, 1H), 7.11 (dd, *J* = 8.1, 1.7 Hz, 1H), 6.58 (d, *J* = 8.1 Hz, 1H), 6.32 (s, 1H), 4.59 (dd, *J* = 5.3, 1.4 Hz, 1H), 4.14 (s, 1H), 2.26 (s, 3H), 1.91 - 1.58 (m, 6H), 1.34 - 1.03 (m, 5H). <sup>13</sup>C NMR(150 MHz, CDCl<sub>3</sub>): δ 165.5, 145.2, 134.8, 128.5, 128.3, 115.6, 114.7, 69.7, 42.4, 27.6, 27.5, 26.2, 25.7, 25.6, 20.4. HRMS (m/z) calcd for C<sub>15</sub>H<sub>21</sub>N<sub>2</sub>O[M+H]<sup>+</sup> 245.1654, found 245.1660; [α]<sub>D</sub><sup>25</sup> = - 142 (c = 0.20, CHCl<sub>3</sub>); The *ee* was determined by HPLC analysis (Chiralpak OD-RH, CH<sub>3</sub>CN/H<sub>2</sub>O = 50/50, v/v, 1.0mL/min, 254nm, t<sub>R</sub> (minor) = 11.4 min, t<sub>R</sub> (major) = 13.1 min), 92% *ee*.

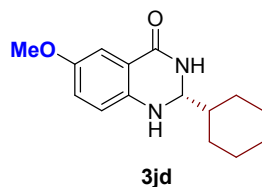

**(R)-2-cyclohexyl-6-methoxy-2,3-dihydroquinazolin-4(1H)-one (3jd).** White solid, yield 96%; m.p. 159~161 °C; <sup>1</sup>H NMR(600 MHz, CDCl<sub>3</sub>): δ 7.39 (d, *J* = 3.0 Hz, 1H), 6.94 (dd, *J* = 8.7, 3.0 Hz, 1H), 6.64 (d, *J* = 8.7 Hz, 1H), 6.35 (s, 1H), 4.57 (d, *J* = 5.0 Hz, 1H), 4.04 (s, 1H), 3.78 (s, 3H), 1.88 - 1.59 (m, 6H), 1.34 - 1.05 (m, 5H). <sup>13</sup>C NMR(150 MHz, CDCl<sub>3</sub>): δ 165.3, 153.2, 141.6, 122.5, 116.7, 116.6, 110.3, 69.9, 55.8, 42.2, 27.7, 27.6, 26.2, 25.8, 25.7. HRMS (m/z) calcd for C<sub>15</sub>H<sub>21</sub>N<sub>2</sub>O<sub>2</sub>[M+H]<sup>+</sup>

261.1603, found 261.1599;  $[\alpha]_D^{25} = -160$  ( $c = 0.20$ ,  $\text{CHCl}_3$ ); The *ee* was determined by HPLC analysis (Chiralpak OD-RH,  $\text{CH}_3\text{CN}/\text{H}_2\text{O} = 50/50$ , v/v, 1.0mL/min, 254nm,  $t_R$  (minor) = 7.5 min,  $t_R$  (major) = 8.7 min), 94% *ee*.

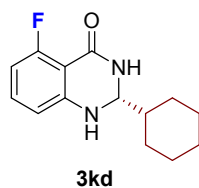

**(R)-2-cyclohexyl-5-fluoro-2,3-dihydroquinazolin-4(1H)-one (3kd).** White solid, yield 90%; m.p. 169~171 °C;  $^1\text{H}$  NMR(600 MHz,  $\text{CDCl}_3$ ):  $\delta$  7.20 (td,  $J = 8.2, 5.6$  Hz, 1H), 6.50 - 6.46 (m, 1H), 6.45 (d,  $J = 8.2$  Hz, 1H), 6.38 (d,  $J = 15.4$  Hz, 1H), 4.56 (dd,  $J = 5.3, 1.6$  Hz, 1H), 4.42 (s, 1H), 1.85-1.76 (m, 4H), 1.74 - 1.62 (m, 2H), 1.31 - 1.20 (m, 2H), 1.20 - 1.02 (m, 3H).  $^{13}\text{C}$  NMR(150 MHz,  $\text{CDCl}_3$ ):  $\delta$  164.0, 162.4 (d,  $J = 41.4$  Hz), 149.5 (d,  $J = 3.8$  Hz), 134.3 (d,  $J = 11.6$  Hz), 110.3 (d,  $J = 3.6$  Hz), 106.7 (d,  $J = 21.8$  Hz), 104.8 (d,  $J = 9.5$  Hz), 69.1, 42.2, 27.6, 27.4, 26.1, 25.7, 25.6. HRMS ( $m/z$ ) calcd for  $\text{C}_{14}\text{H}_{18}\text{FN}_2\text{O}[\text{M}+\text{H}]^+$  249.1403, found 249.1398;  $[\alpha]_D^{25} = -135$  ( $c = 0.20$ ,  $\text{CHCl}_3$ ); The *ee* was determined by HPLC analysis (Chiralpak OD-RH,  $\text{CH}_3\text{CN}/\text{H}_2\text{O} = 60/40$ , v/v, 1.0mL/min, 254nm,  $t_R$  (minor) = 5.7 min,  $t_R$  (major) = 6.9 min), 96% *ee*.

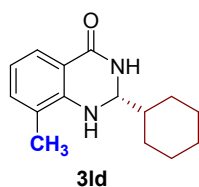

**(R)-2-cyclohexyl-8-methyl-2,3-dihydroquinazolin-4(1H)-one (3ld).** White solid, yield 95%; m.p. 119~122 °C;  $^1\text{H}$  NMR(600 MHz,  $\text{CDCl}_3$ ):  $\delta$  7.77 (d,  $J = 7.7$  Hz, 1H), 7.18 (d,  $J = 7.3$  Hz, 1H), 6.76 (t,  $J = 7.6$  Hz, 1H), 6.50 (s, 1H), 4.63 (dd,  $J = 5.5, 1.4$  Hz, 1H), 4.12 (s, 1H), 2.16 (s, 3H), 1.93 - 1.63 (m, 6H), 1.34 - 1.04 (m, 5H).  $^{13}\text{C}$  NMR(150 MHz,  $\text{CDCl}_3$ ):  $\delta$  165.6, 145.5, 134.7, 126.3, 121.8, 118.4, 115.2, 69.4, 42.6, 27.8, 27.5, 26.2, 25.7, 25.6, 16.6. HRMS ( $m/z$ ) calcd for  $\text{C}_{15}\text{H}_{21}\text{N}_2\text{O}[\text{M}+\text{H}]^+$  245.1654, found 245.1658;  $[\alpha]_D^{25} = -80$  ( $c = 0.20$ ,  $\text{CHCl}_3$ ); The *ee* was determined by HPLC analysis (Chiralpak OD-RH,  $\text{CH}_3\text{CN}/\text{H}_2\text{O} = 60/40$ , v/v, 1.0mL/min, 254nm,  $t_R$  (minor) = 10.1 min,  $t_R$  (major) = 11.6 min), 41% *ee*.

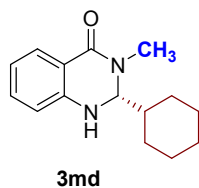

**(R)-2-cyclohexyl-3-methyl-2,3-dihydroquinazolin-4(1H)-one (3md).** White solid, yield 99%; m.p. 168~170 °C;  $^1\text{H}$  NMR(600 MHz,  $\text{CDCl}_3$ ):  $\delta$  7.86 (d,  $J = 7.6$  Hz, 1H), 7.24 (dd,  $J = 13.9, 6.0$  Hz, 1H), 6.79 (t,  $J = 7.5$  Hz, 1H), 6.59 (d,  $J = 8.0$  Hz, 1H), 4.36 (d,  $J = 6.1$  Hz, 1H), 3.14 (s, 3H), 1.91 - 1.57 (m, 6H), 1.28 - 0.88 (m, 5H).  $^{13}\text{C}$  NMR(150 MHz,  $\text{CDCl}_3$ ):  $\delta$  162.9, 145.7, 133.1, 128.3, 118.5, 116.7, 113.9, 76.1, 42.9, 35.0, 29.0, 27.8, 26.0, 25.9, 25.6. HRMS ( $m/z$ ) calcd for  $\text{C}_{15}\text{H}_{21}\text{N}_2\text{O}[\text{M}+\text{H}]^+$  245.1654, found 265.1666;  $[\alpha]_D^{25} = -120$  ( $c = 0.20$ ,  $\text{CHCl}_3$ ); The *ee* was determined by HPLC analysis (Chiralpak OD-RH,  $\text{CH}_3\text{CN}/\text{H}_2\text{O} = 50/50$ , v/v, 1.0mL/min, 254nm,  $t_R$  (minor) = 5.2 min,  $t_R$  (major) = 7.5 min), 74% *ee*.

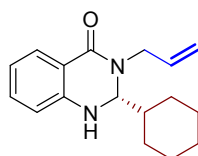

**3nd**

**(R)-3-allyl-2-cyclohexyl-2,3-dihydroquinazolin-4(1H)-one (3nd).** White solid, yield 70%;  $^1\text{H}$  NMR(600 MHz,  $\text{CDCl}_3$ ):  $\delta$  7.88 (dd,  $J = 7.8, 1.4$  Hz, 1H), 7.29 - 7.15 (m, 1H), 6.89 - 6.75 (m, 1H), 6.60 (d,  $J = 8.0$  Hz, 1H), 5.92 - 5.77 (m, 1H), 5.34 - 5.22 (m, 1H), 5.19 (dd,  $J = 10.2, 1.3$  Hz, 1H), 5.05 - 4.90 (m, 1H), 4.34 (d,  $J = 6.7$  Hz, 1H), 3.46 - 3.36 (m, 1H), 3.50 - 3.32 (m, 1H), 1.91 - 1.55 (m, 6H), 1.28 - 0.82 (m, 5H).  $^{13}\text{C}$  NMR(150 MHz,  $\text{CDCl}_3$ ):  $\delta$  162.5, 145.8, 133.2, 133.1, 128.6, 118.6, 117.0, 116.9, 114.1, 72.7, 48.6, 42.8, 29.1, 28.2, 26.0, 25.9, 25.6. HRMS ( $m/z$ ) calcd for  $\text{C}_{17}\text{H}_{23}\text{N}_2\text{O}[\text{M}+\text{H}]^+$  271.18104, found 271.1816;  $[\alpha]_{\text{D}}^{25} = -90$  ( $c = 0.20$ ,  $\text{CHCl}_3$ ); The *ee* was determined by HPLC analysis (Chiralpak OD-RH,  $\text{CH}_3\text{CN}/\text{H}_2\text{O} = 50/50$ , v/v, 1.0mL/min, 254nm,  $t_{\text{R}}$  (minor) = 6.3 min,  $t_{\text{R}}$  (major) = 8.2 min), 72% *ee*.

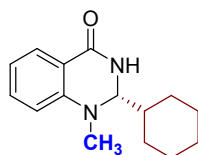

**3od**

**(R)-2-cyclohexyl-1-methyl-2,3-dihydroquinazolin-4(1H)-one (3od).** White solid, yield 70%; m.p. 147~148 °C;  $^1\text{H}$  NMR(600 MHz,  $\text{CDCl}_3$ ):  $\delta$  7.87 (d,  $J = 7.7$  Hz, 1H), 7.36 (dd,  $J = 8.1, 7.4$  Hz, 1H), 7.14 (s, 1H), 6.76 (t,  $J = 7.5$  Hz, 1H), 6.57 (d,  $J = 8.3$  Hz, 1H), 4.40 (t,  $J = 4.8$  Hz, 1H), 3.02 (s, 3H), 1.80-1.57 (m, 6H), 1.18 - 0.93 (m, 5H). 4.66 (dd,  $J = 5.2, 1.1$  Hz, 2H), 1.89 - 1.77 (m, 4H), 1.75 - 1.62 (m, 2H), 1.41 - 0.92 (m, 5H).  $^{13}\text{C}$  NMR(150 MHz,  $\text{CDCl}_3$ ):  $\delta$  163.4, 146.6, 133.2, 127.3, 116.1, 116.0, 110.6, 75.3, 42.8, 36.8, 27.3, 26.0, 25.0, 24.8, 24.6. HRMS ( $m/z$ ) calcd for  $\text{C}_{14}\text{H}_{21}\text{N}_2\text{O}[\text{M}+\text{H}]^+$  245.1654, found 245.1667;  $[\alpha]_{\text{D}}^{25} = -140$  ( $c = 0.20$ ,  $\text{CHCl}_3$ ); The *ee* was determined by HPLC analysis (Chiralpak OD-RH,  $\text{CH}_3\text{CN}/\text{H}_2\text{O} = 40/60$ , v/v, 1.0mL/min, 254nm,  $t_{\text{R}}$  (minor) = 6.6 min,  $t_{\text{R}}$  (major) = 10.3 min), 58% *ee*.

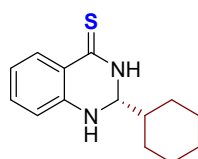

**3pd**

**(R)-2-cyclohexyl-2,3-dihydroquinazolin-4(1H)-thione (3pd).** Yellow solid, yield 99% (small-scale), yield 90% (Gram-scale); m.p. 198~200 °C;  $^1\text{H}$  NMR(600 MHz,  $\text{CDCl}_3$ ):  $\delta$  8.29 (dd,  $J = 8.0, 0.9$  Hz, 1H), 8.13 (s, 1H), 7.33 - 7.27 (m, 1H), 6.82 (t,  $J = 7.6$  Hz, 1H), 6.62 (d,  $J = 8.1$  Hz, 1H), 4.53 (dd,  $J = 5.4, 2.1$  Hz, 1H), 4.41 (s, 1H), 1.87 - 1.70 (m, 6H), 1.27 - 1.10 (m, 5H).  $^{13}\text{C}$  NMR(150 MHz,  $\text{CDCl}_3$ ):  $\delta$  191.8, 143.2, 134.5, 132.6, 120.7, 119.5, 114.9, 69.7, 41.7, 27.7, 27.5, 26.0, 25.7, 25.6. HRMS ( $m/z$ ) calcd for  $\text{C}_{14}\text{H}_{19}\text{N}_2\text{S}[\text{M}+\text{H}]^+$  247.1269, found 247.1255;  $[\alpha]_{\text{D}}^{25} = -267$  ( $c = 0.20$ ,  $\text{CHCl}_3$ ); The *ee* was determined by HPLC analysis (Chiralpak OD-RH,  $\text{CH}_3\text{CN}/\text{H}_2\text{O} = 60/40$ , v/v, 1.0mL/min, 254nm,  $t_{\text{R}}$  (minor) = 7.7 min,  $t_{\text{R}}$  (major) = 9.3 min), 96% *ee*.

### 3. NMR and HRM spectrum of 2,3-Dihydroquinazolinones **3**



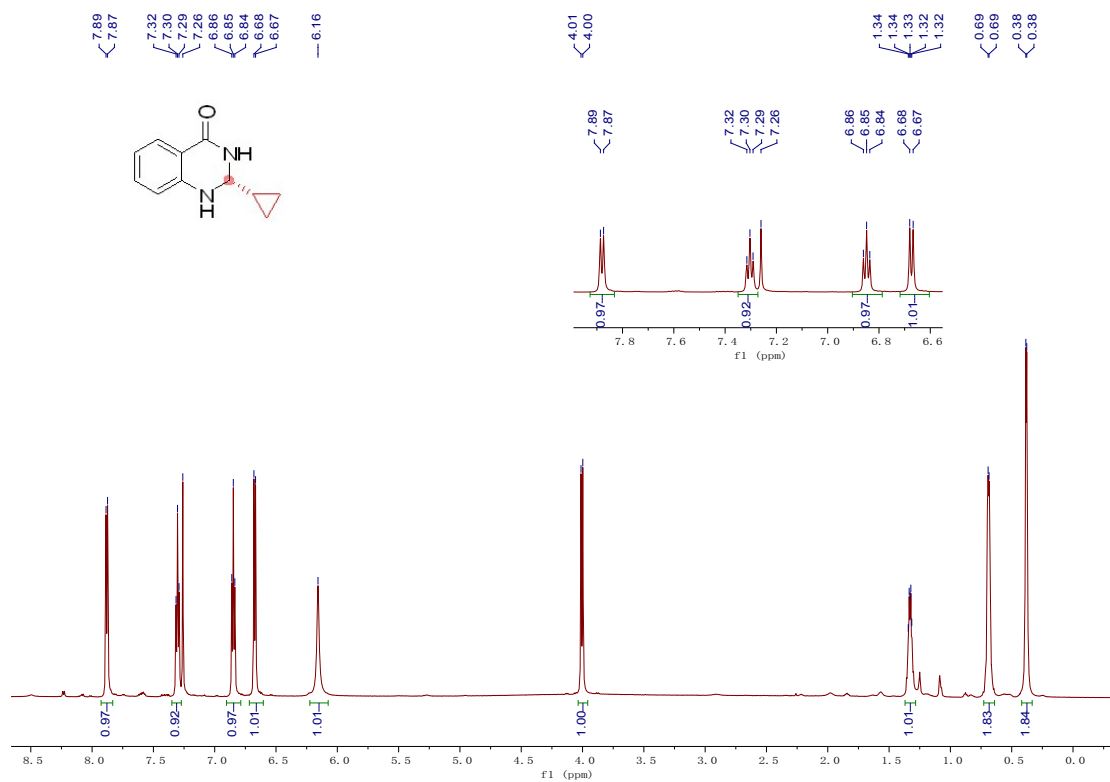

Fig.S 1 <sup>1</sup>H NMR of compound **3aa**

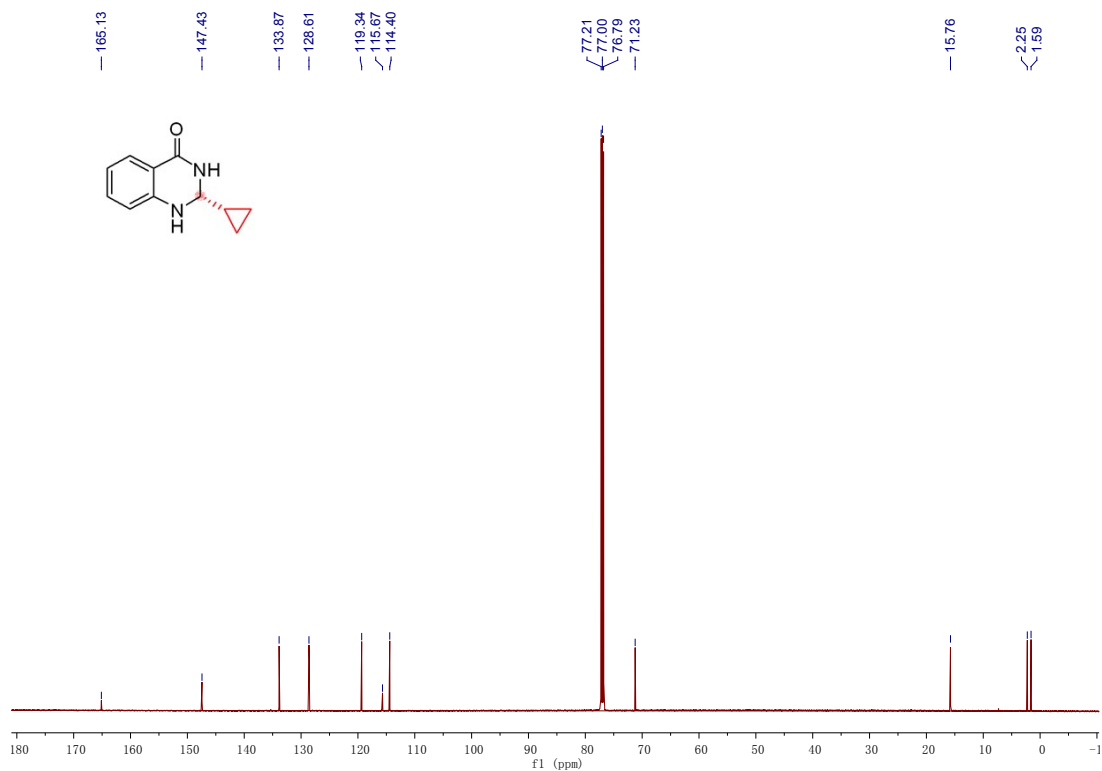

Fig.S 2 <sup>13</sup>C NMR of compound **3aa**

Sample Name 1-3aa-MS Position P1-A2 Instrument Name Instrument 1 User Name  
 Inj Vol 1 InjPosition SampleType Sample IRM Calibration Status All Ions Missed  
 Data Filename 1-3aa-MS.d ACQ Method LCC-FULLSCAN-L2A.m Comment Acquired Time 8/5/2020 2:59:07 AM

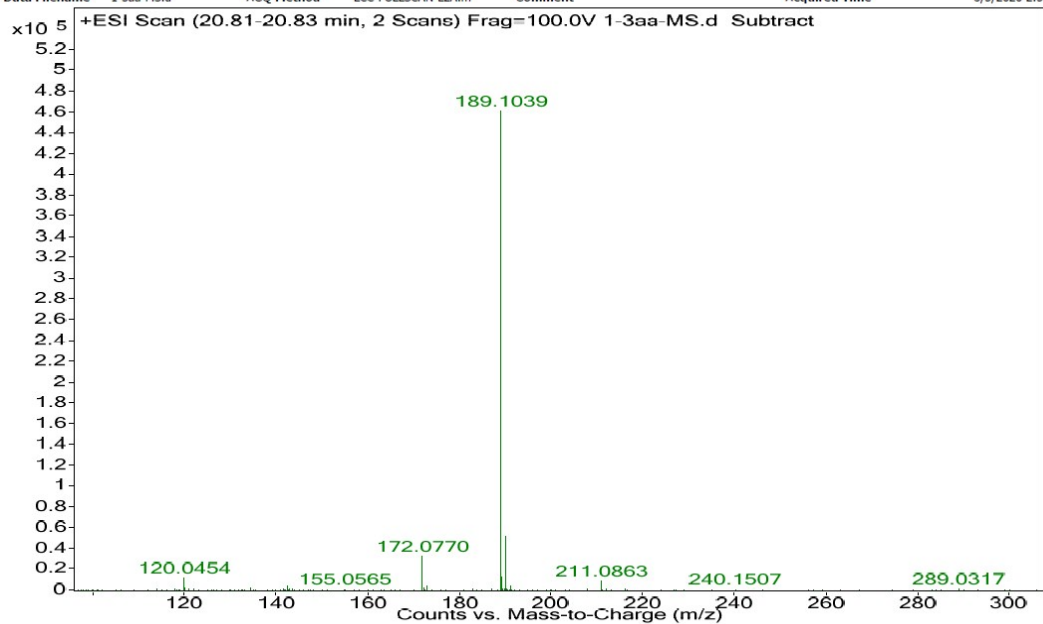

Fig.S 3 HR-MS of compound **3aa**

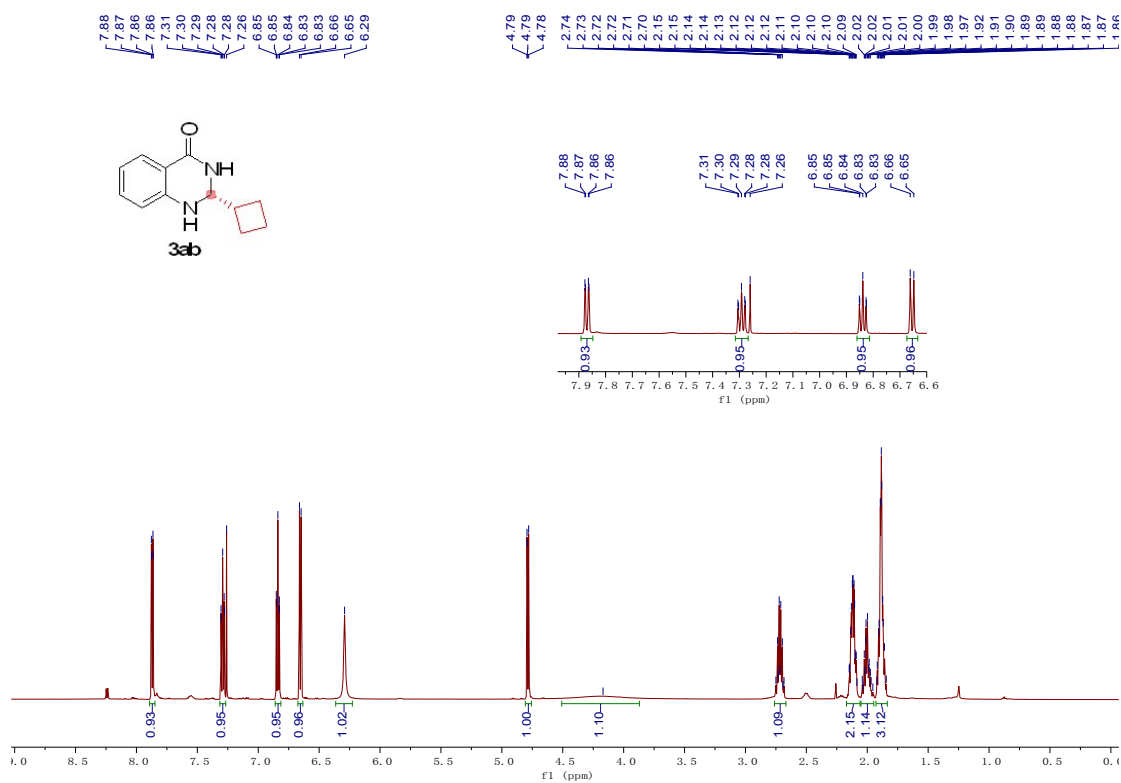

Fig.S 4 <sup>1</sup>H NMR of compound **3ab**

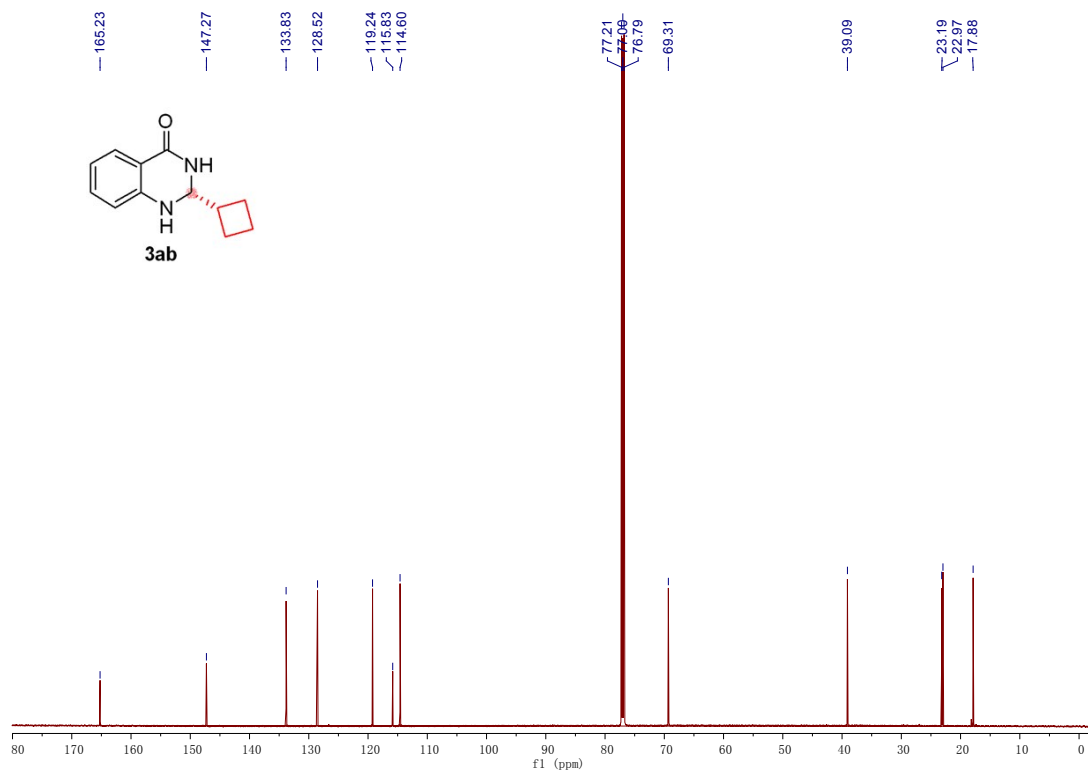

Fig.S 5 <sup>13</sup>C NMR of compound **3ab**

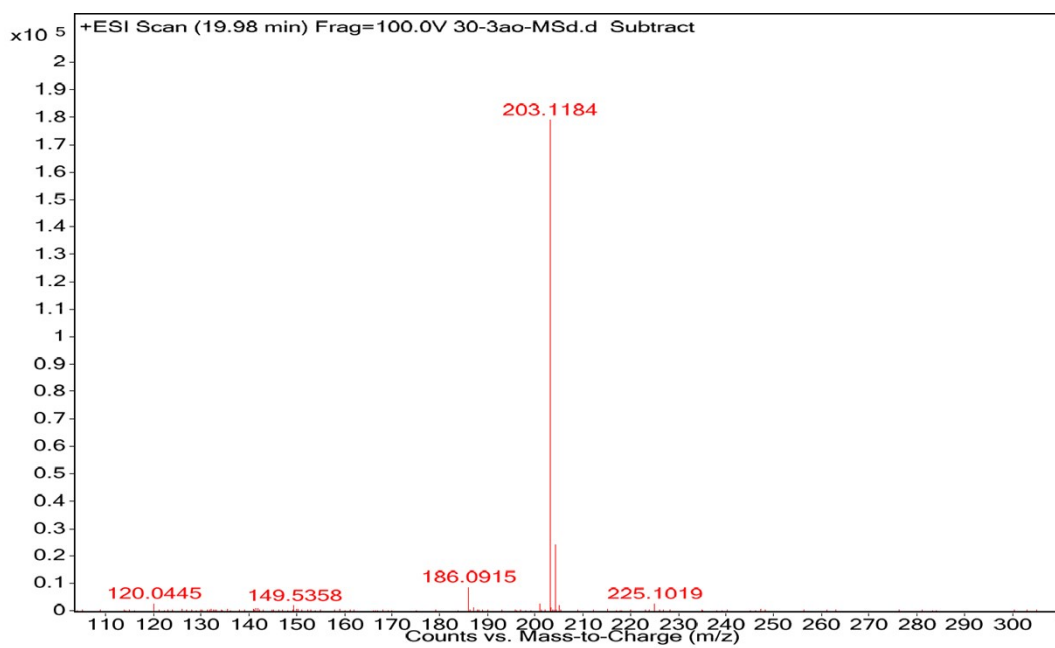

Fig.S 6 HR-MS of compound **3ab**

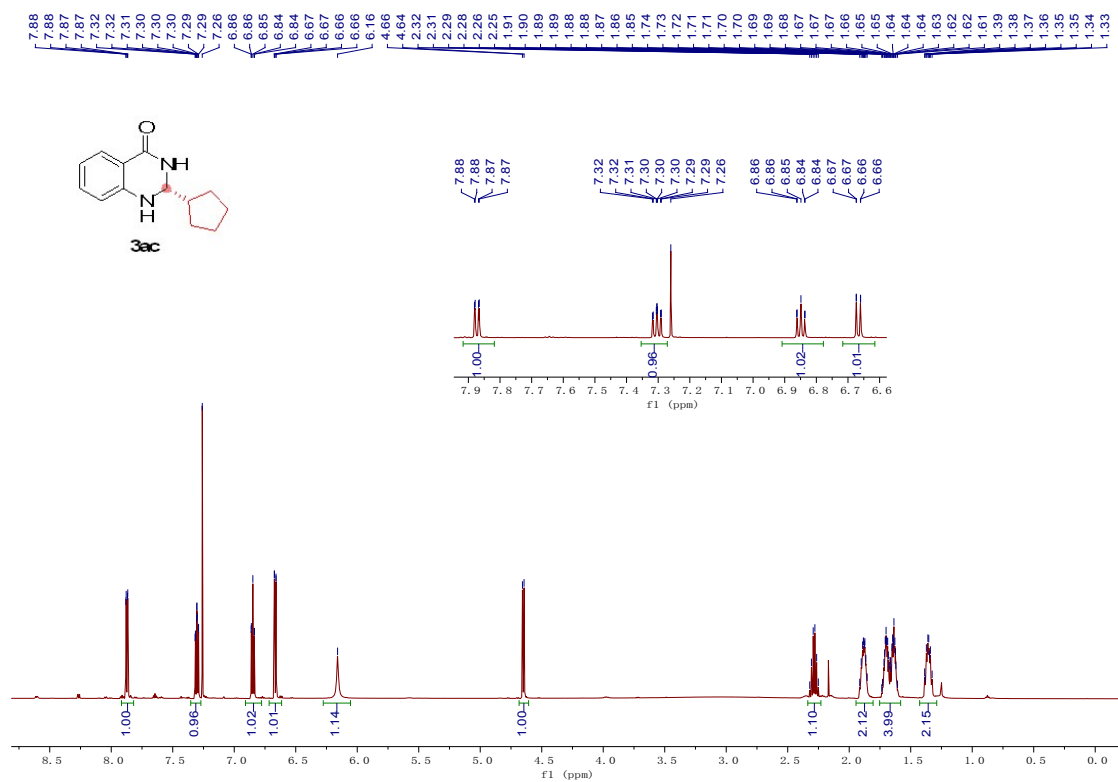

Fig.S 7 <sup>1</sup>H NMR of compound **3ac**

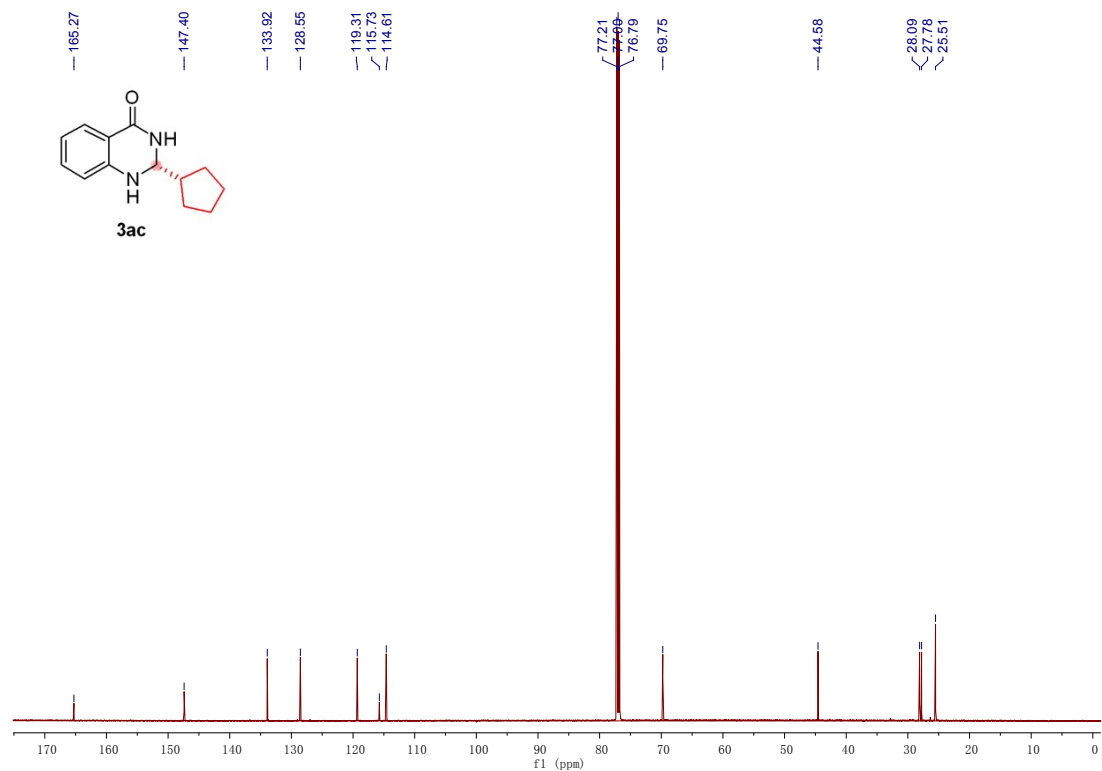

Fig.S 8 <sup>13</sup>C NMR of compound **3ac**

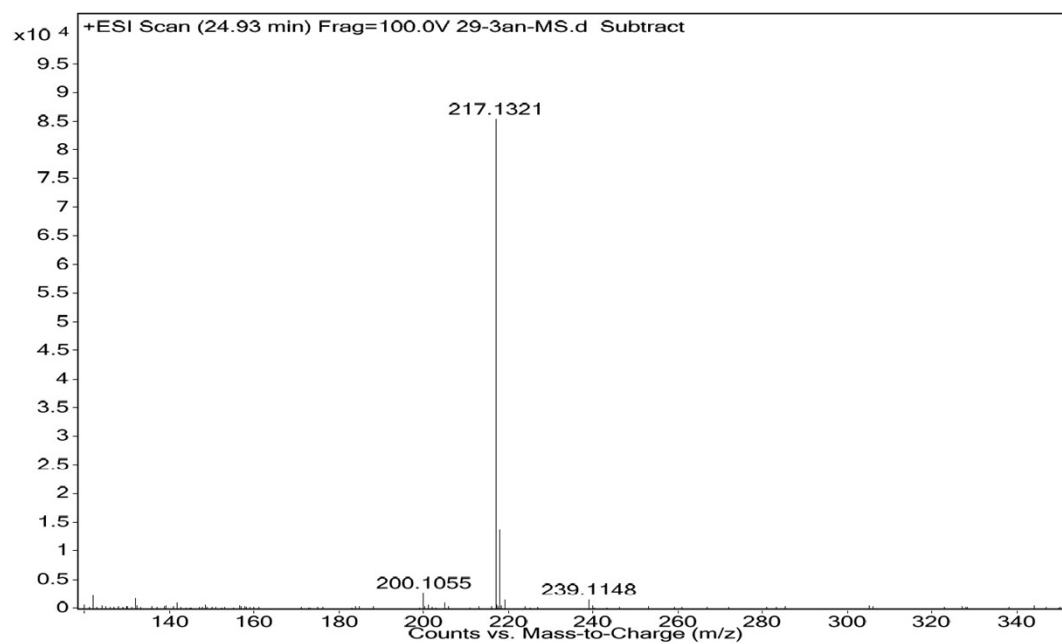

Fig.S 9 HR-MS of compound **3ac**

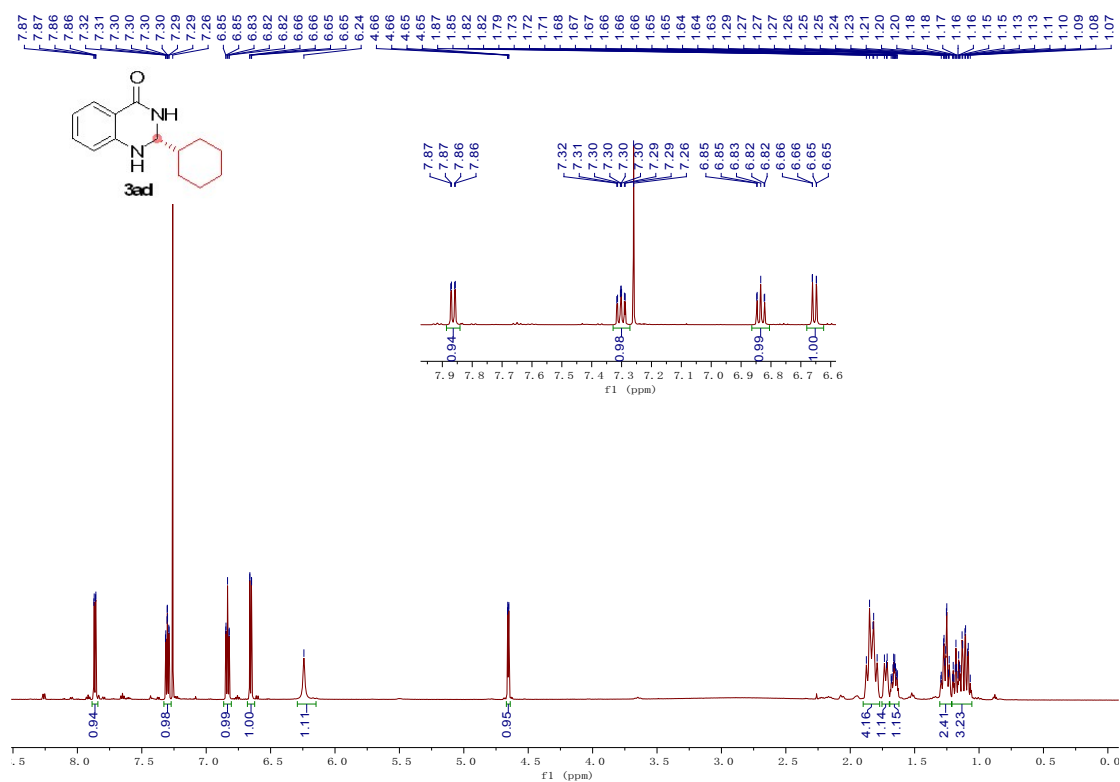

Fig.S 10 <sup>1</sup>H NMR of compound **3ad** (Gram-scale)

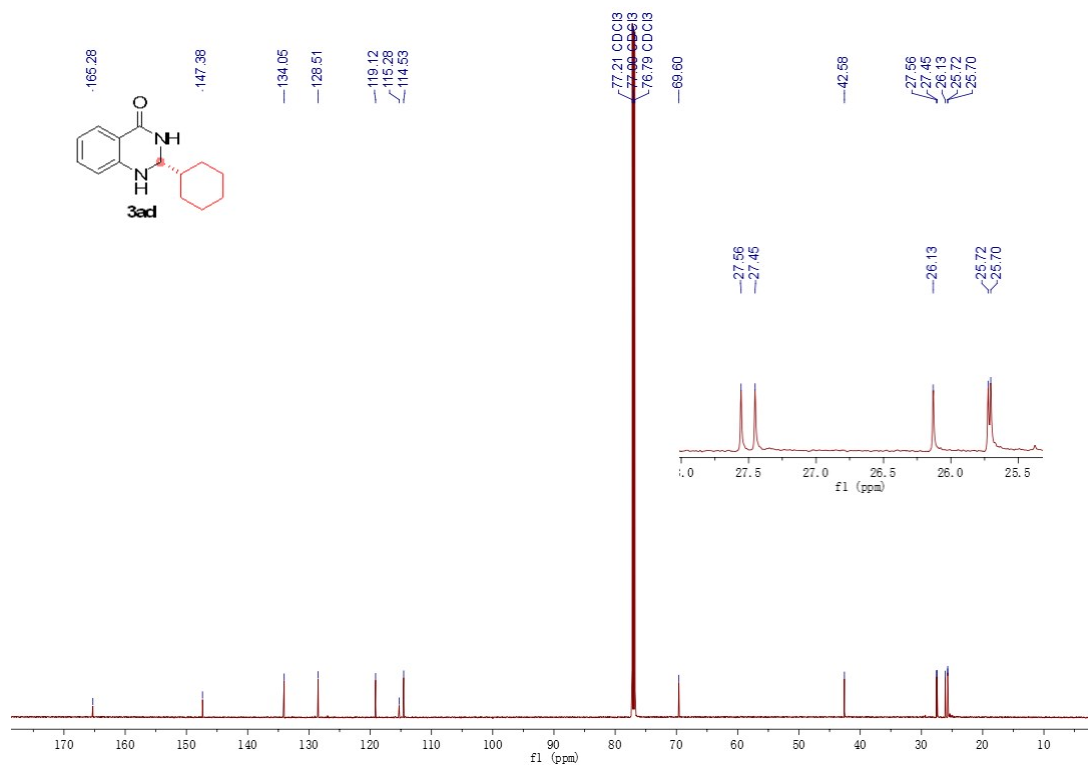

Fig.S 11 <sup>13</sup>C NMR of compound **3ad** (Gram-scale)

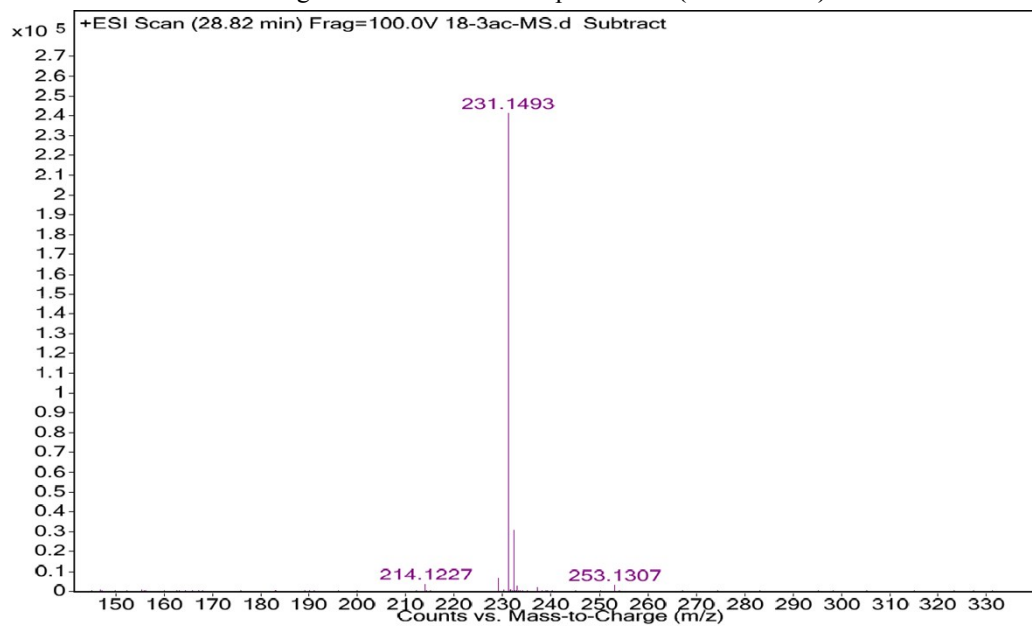

Fig.S 12 HR-MS of compound **3ad** (Gram-scale)

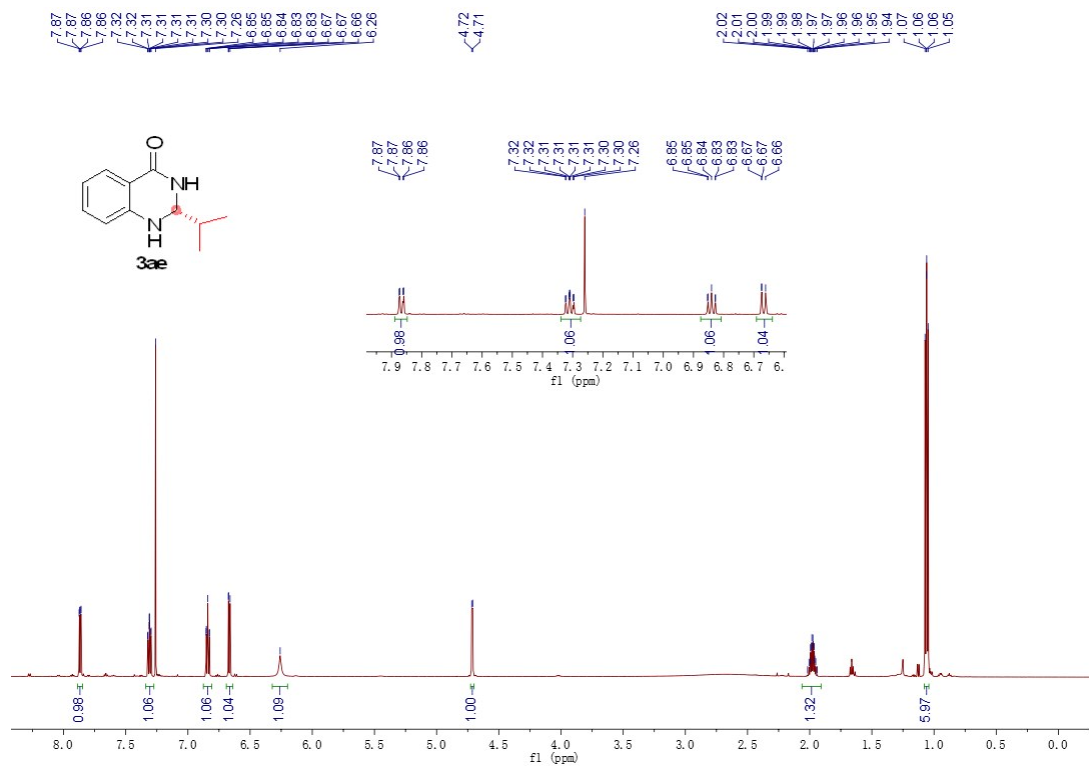

Fig.S 13 <sup>1</sup>H NMR of compound 3ae (Gram-scale)

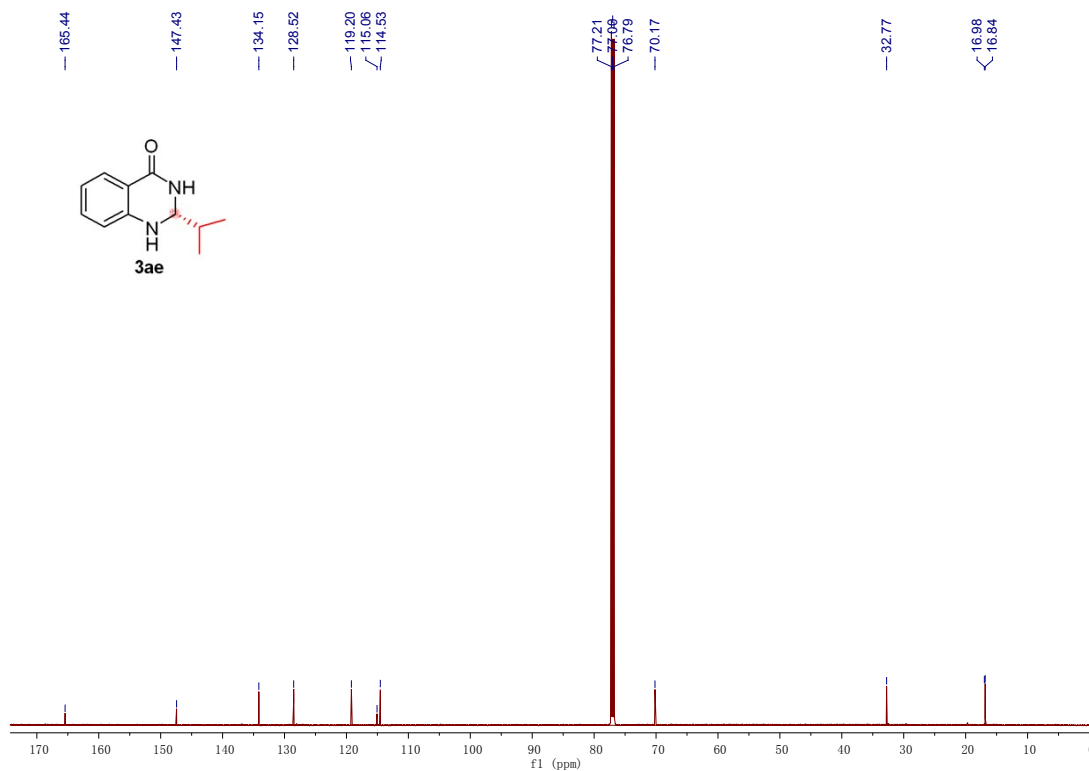

Fig.S 14 <sup>13</sup>C NMR of compound 3ae (Gram-scale)

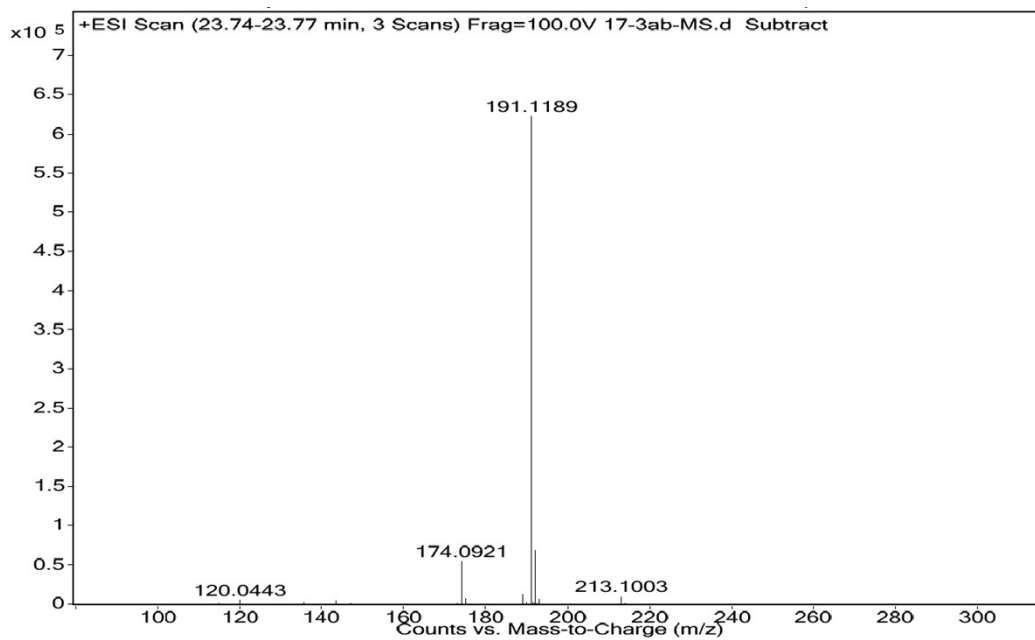

Fig.S 15 HR-MS of compound **3ae** (Gram-scale)

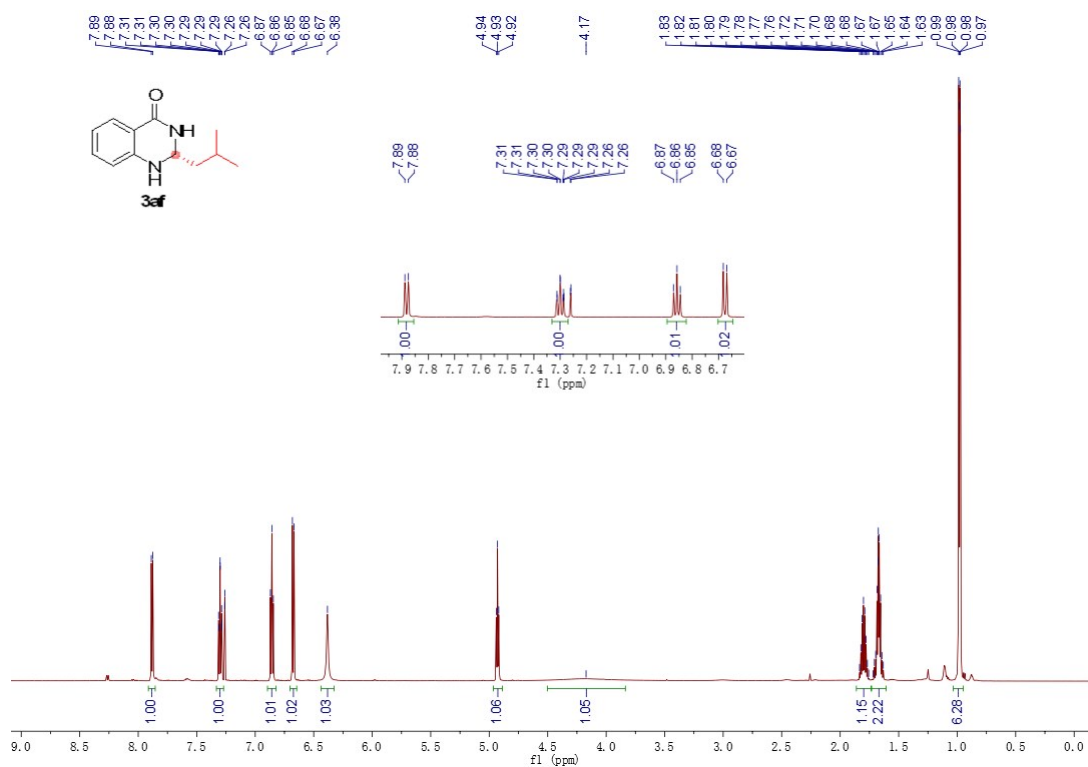

Fig.S 16 <sup>1</sup>H NMR of compound **3af**



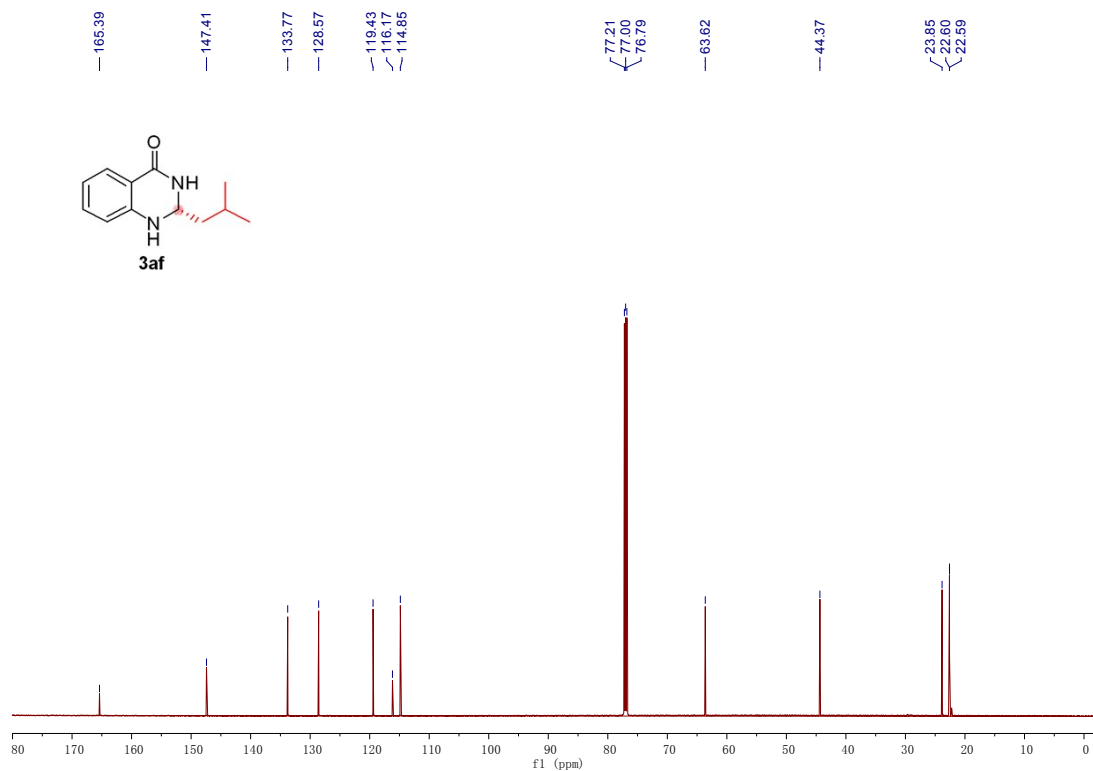

Fig.S 17  $^{13}\text{C}$  NMR of compound **3af**

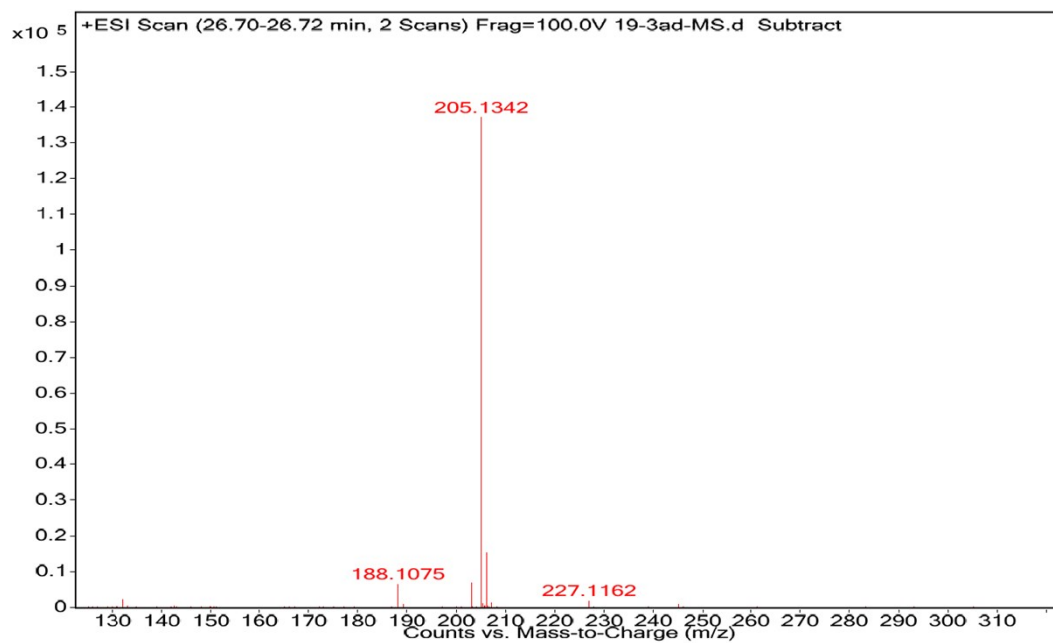

Fig.S 18 HR-MS of compound **3af**

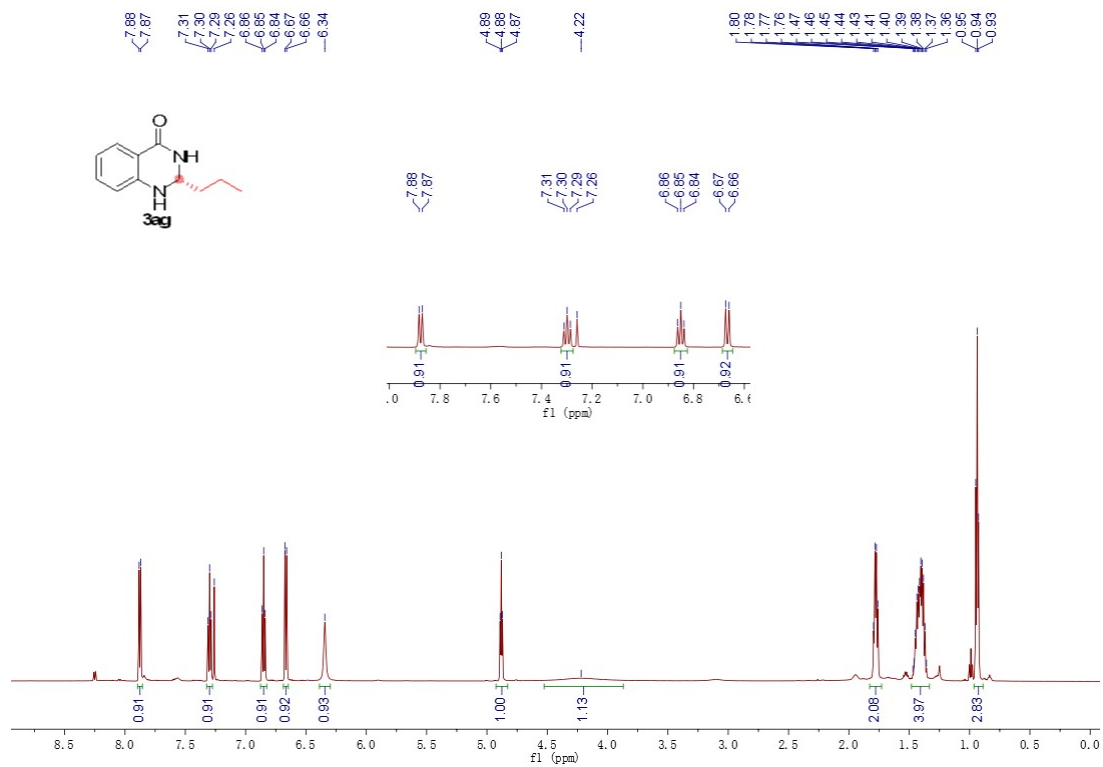

Fig.S 19 <sup>1</sup>H NMR of compound **3ag** (Gram-scale)

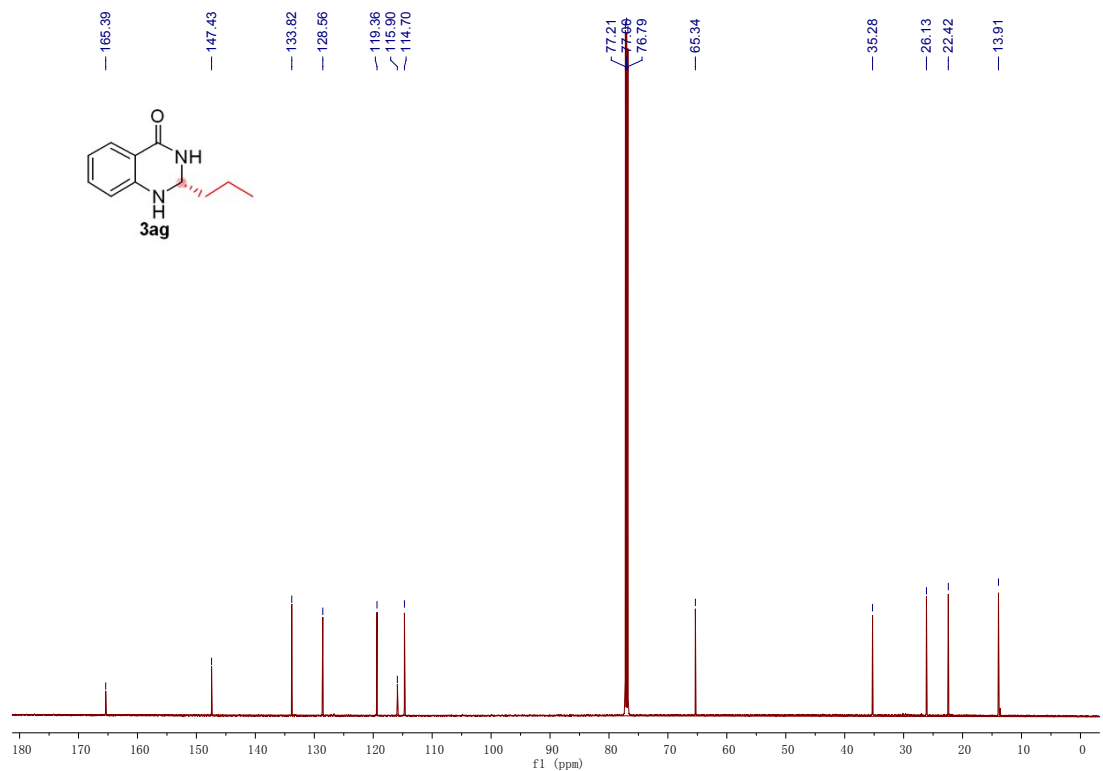

Fig.S 20 <sup>13</sup>C NMR of compound **3ag** (Gram-scale)



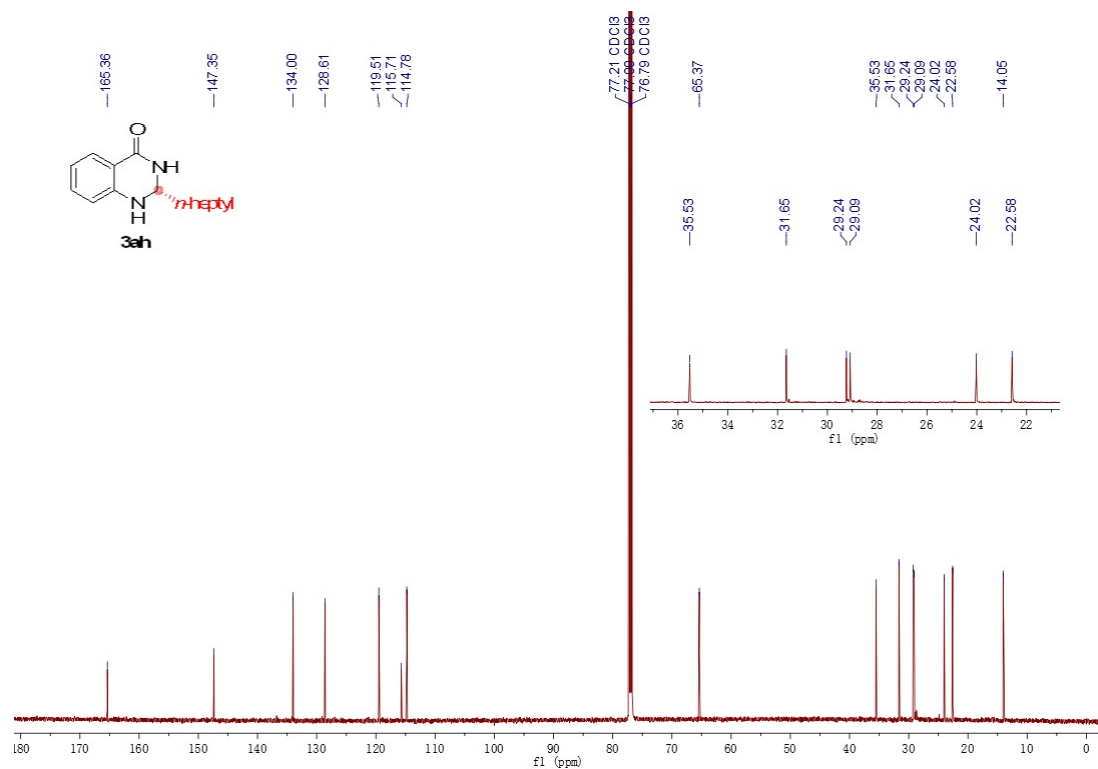

Fig.S 23 <sup>13</sup>C NMR of compound **3ah**

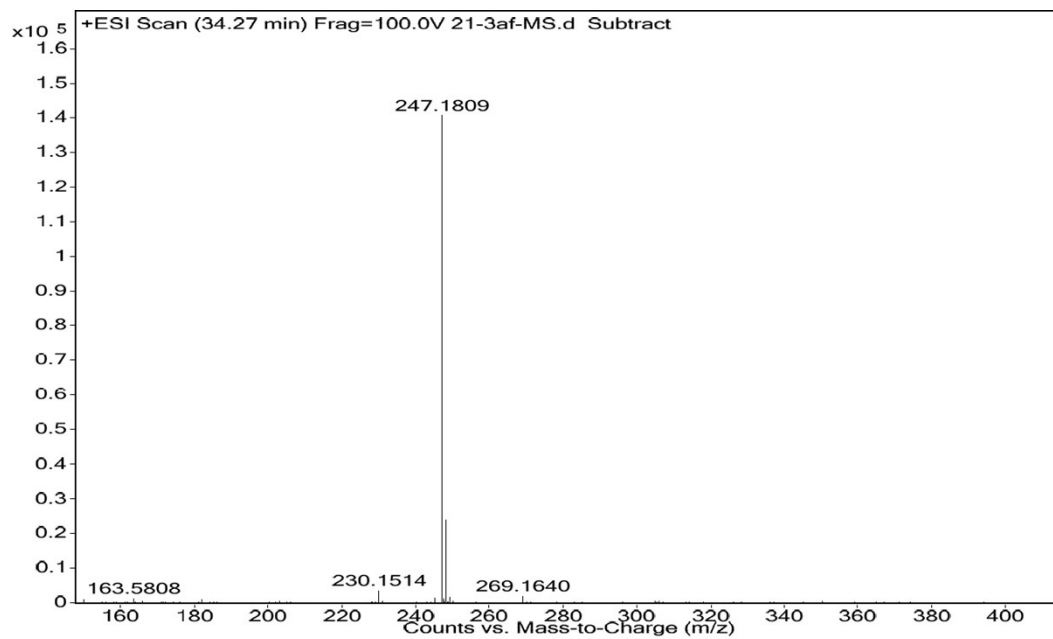

Fig.S 24 HR-MS of compound **3ah**

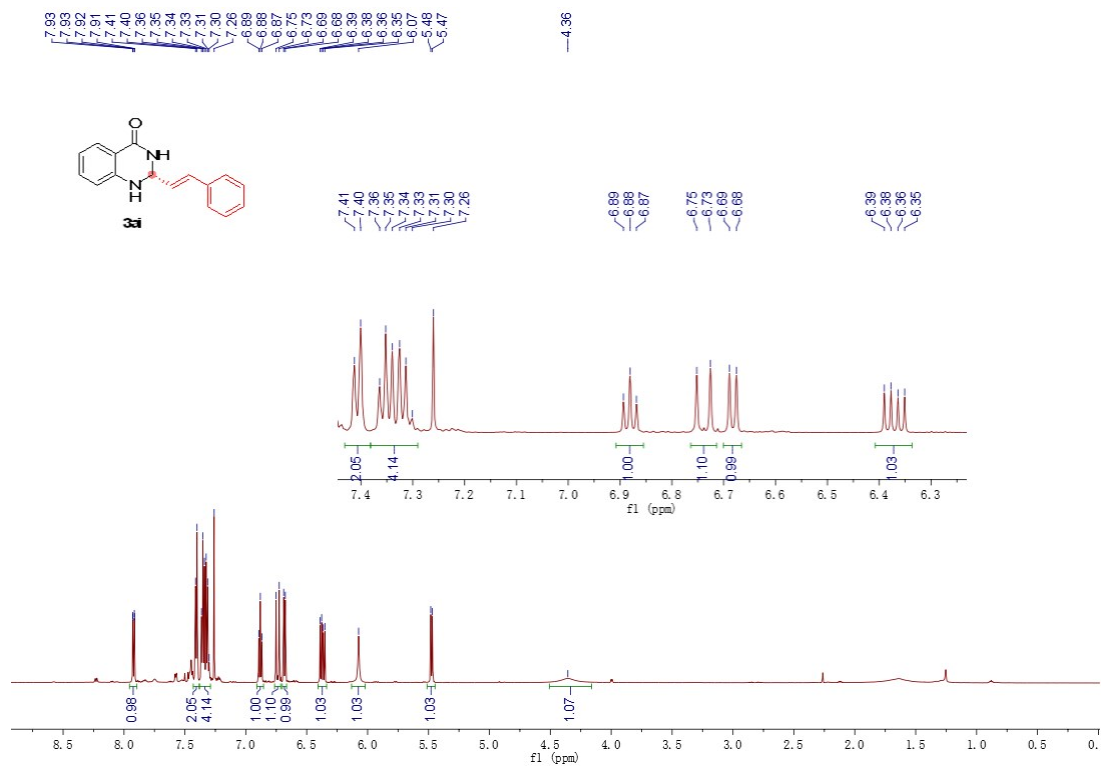

Fig.S 25 <sup>1</sup>H NMR of compound 3ai (Gram-scale)

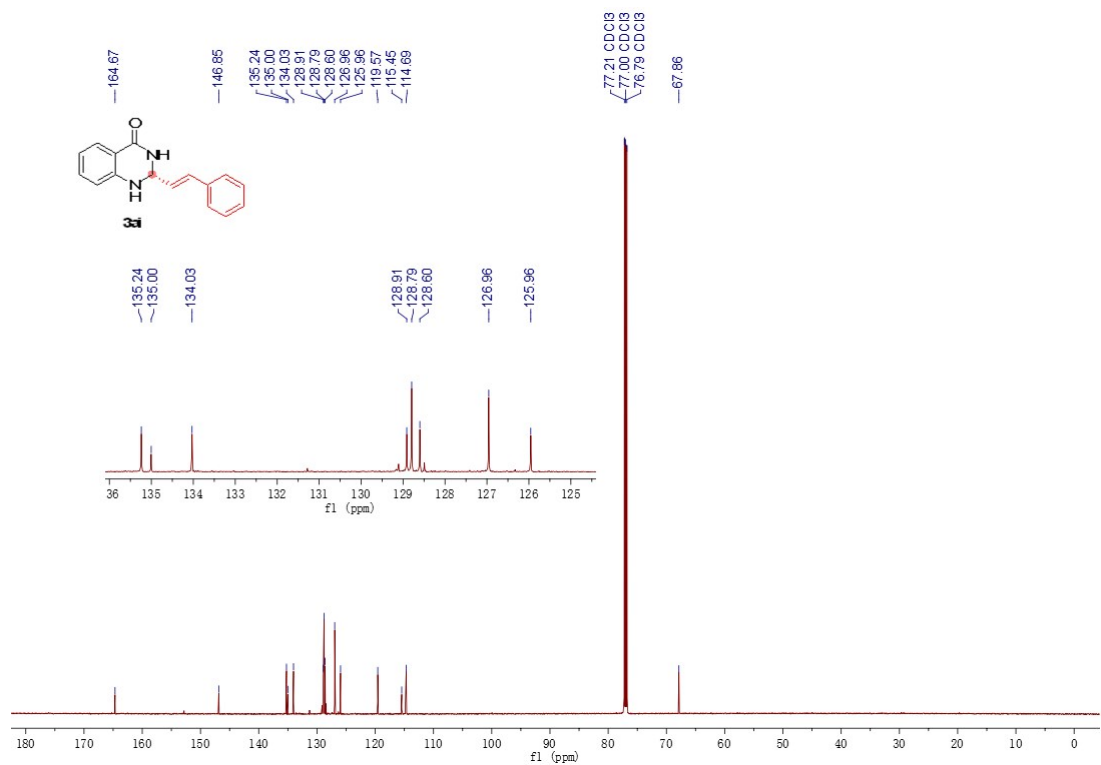

Fig.S 26 <sup>13</sup>C NMR of compound 3ai (Gram-scale)

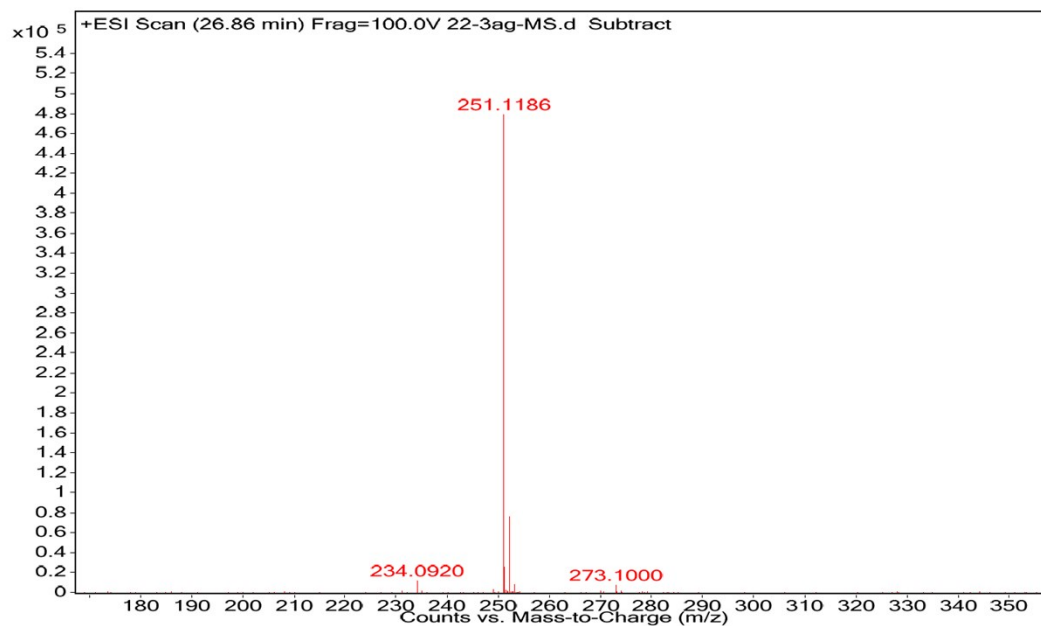

Fig.S 27 HR-MS of compound **3ai** (Gram-scale)

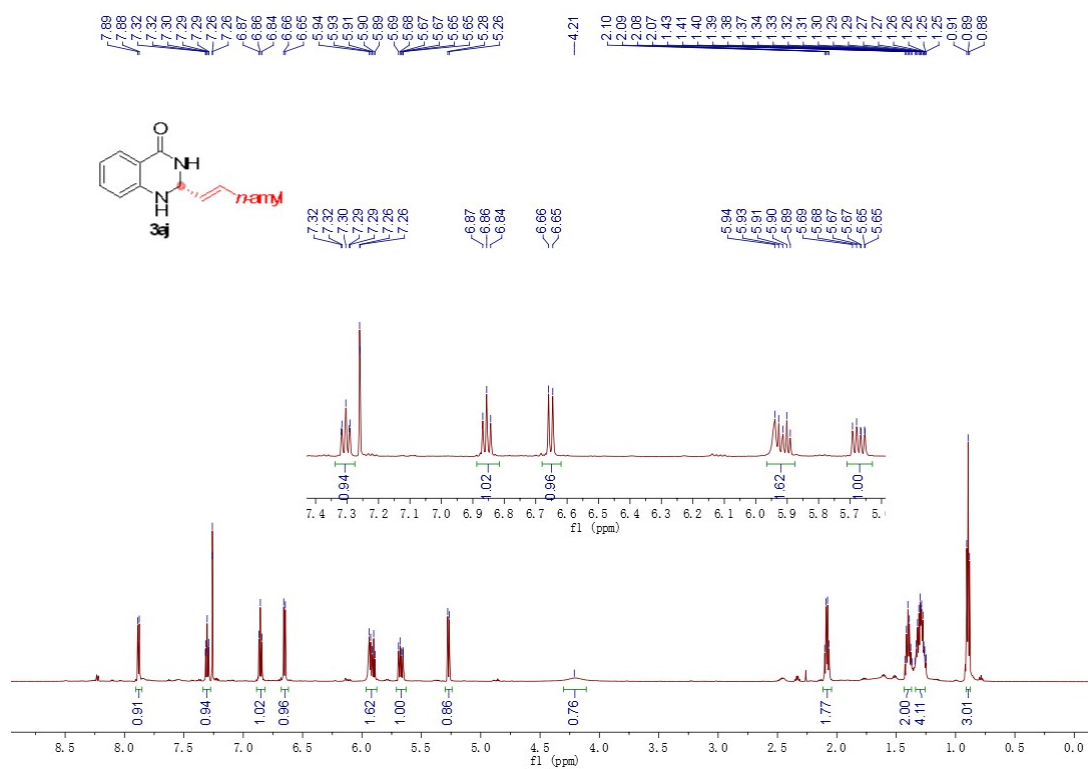

Fig.S 28 <sup>1</sup>H NMR of compound **3aj**

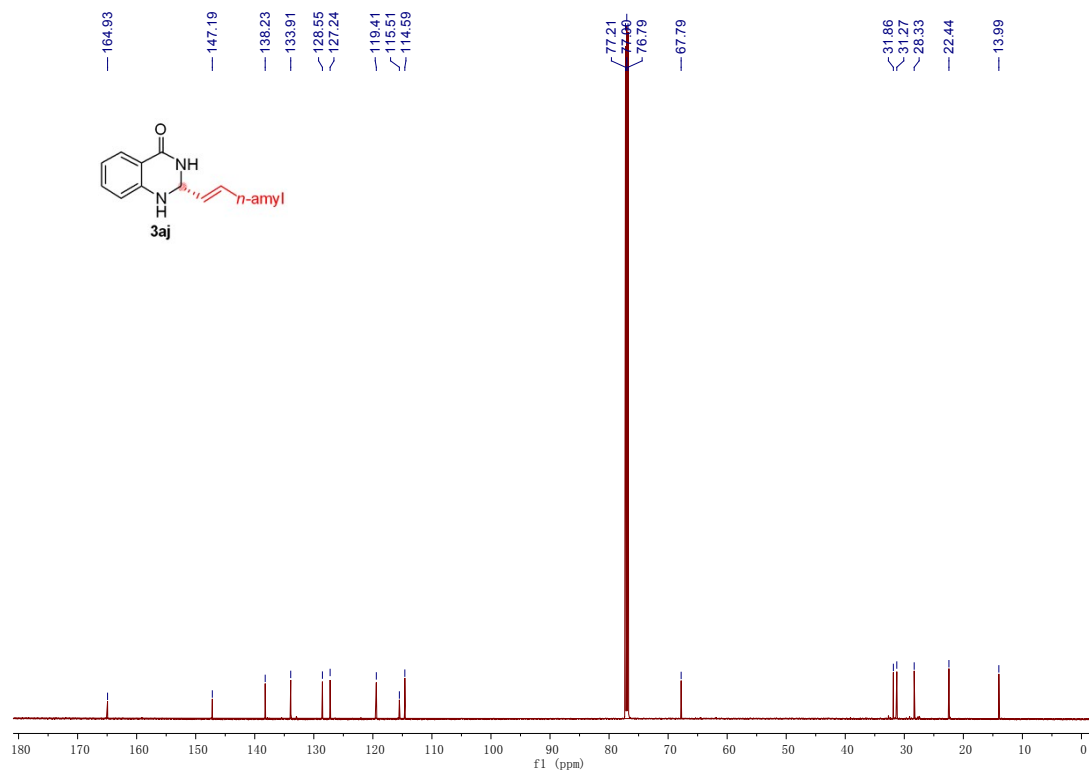

Fig.S 29 <sup>13</sup>C NMR of compound **3aj**

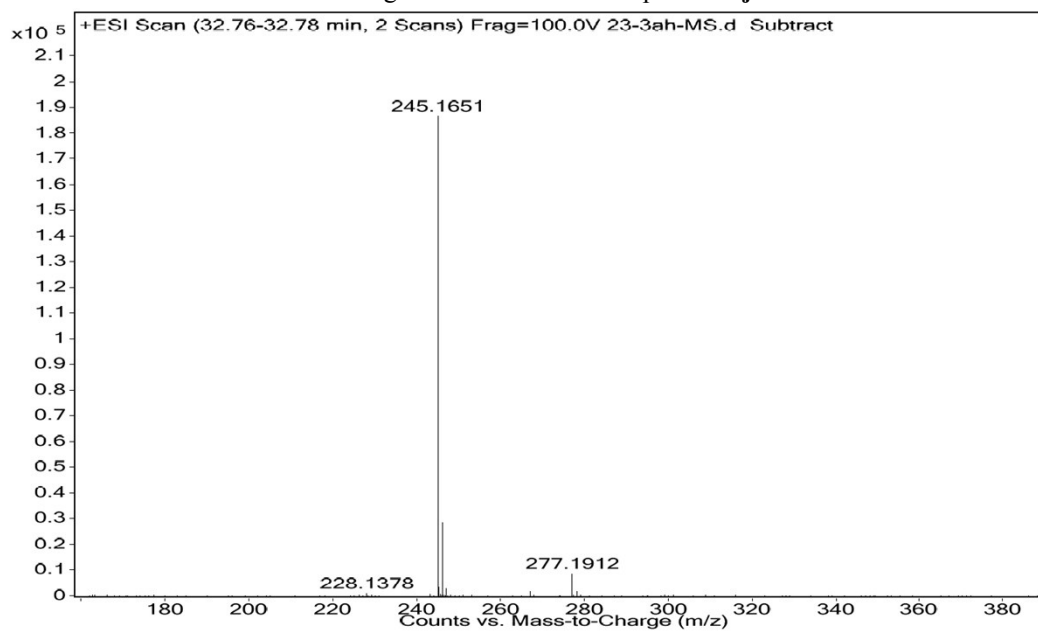

Fig.S 30 HR-MS of compound **3aj**

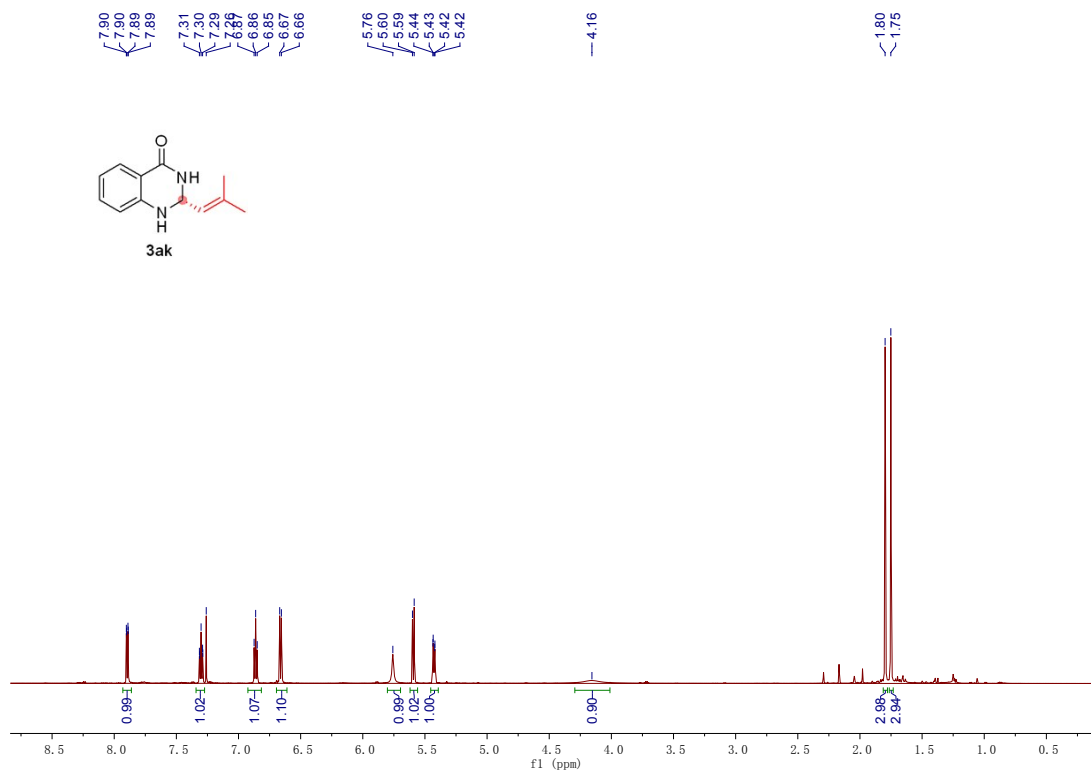

Fig.S 31 <sup>1</sup>H NMR of compound **3ak** (Gram-scale)

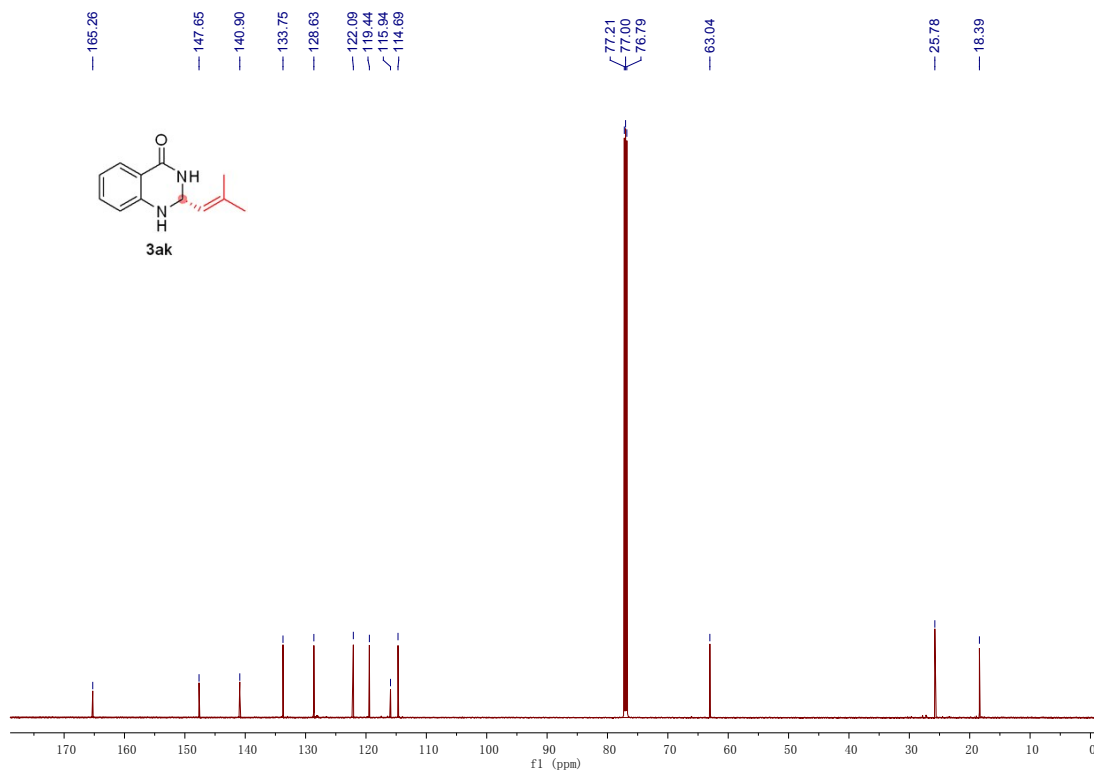

Fig.S 32 <sup>13</sup>C NMR of compound **3ak** (Gram-scale)



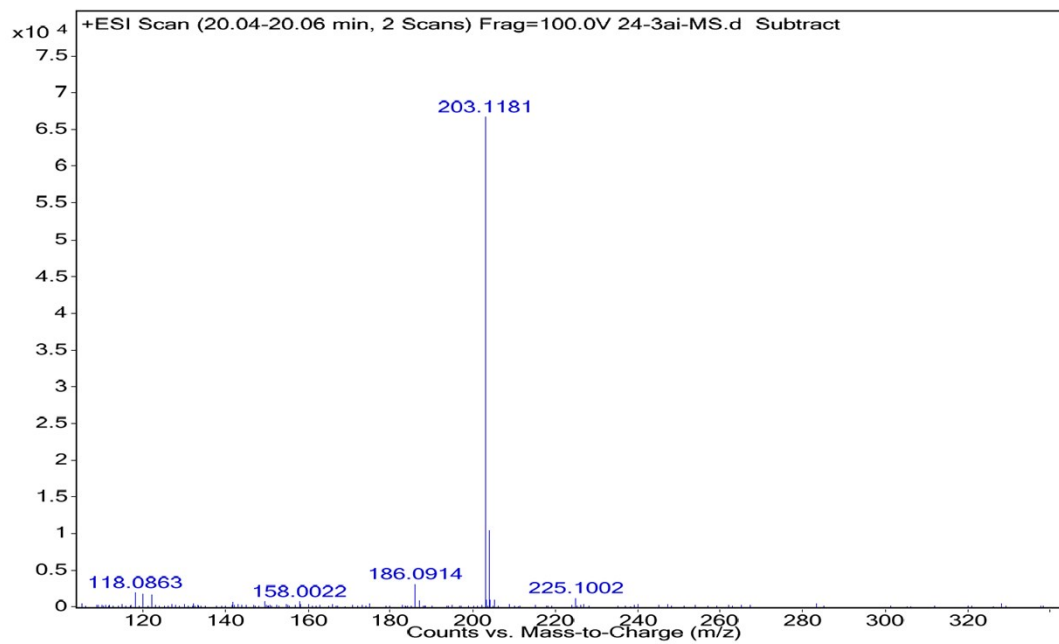

Fig.S 33 HR-MS of compound **3ak** (Gram-scale)

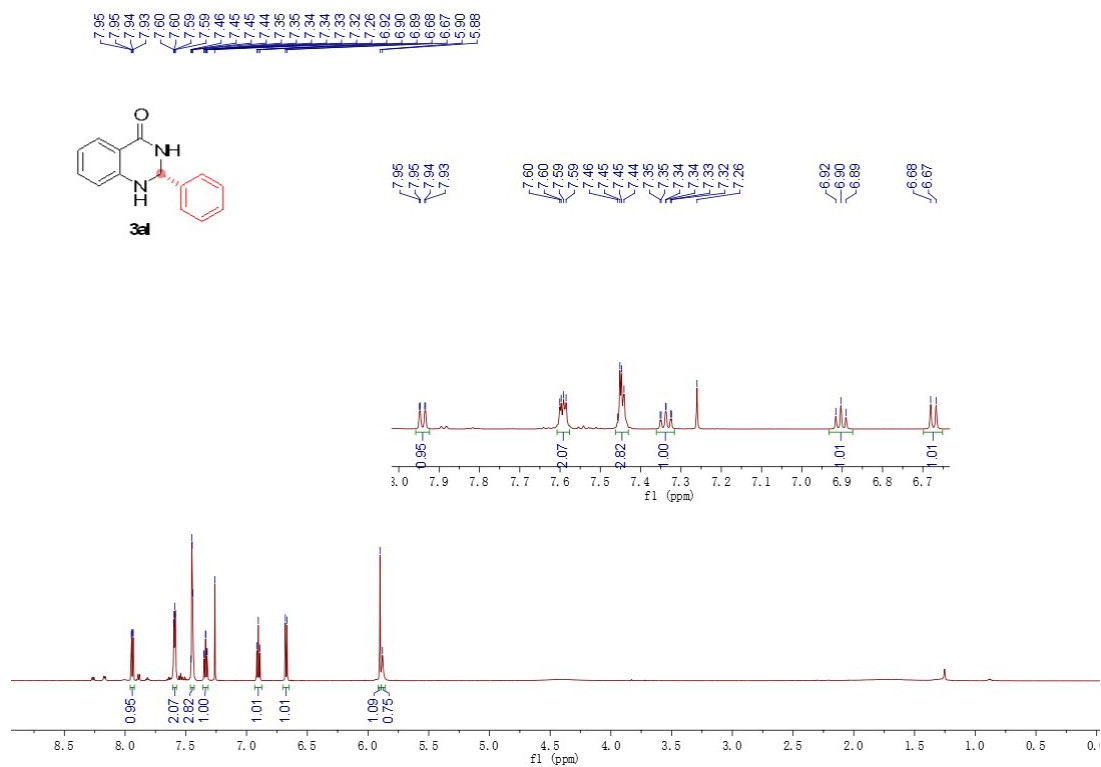

Fig.S 34 <sup>1</sup>H NMR of compound **3al**

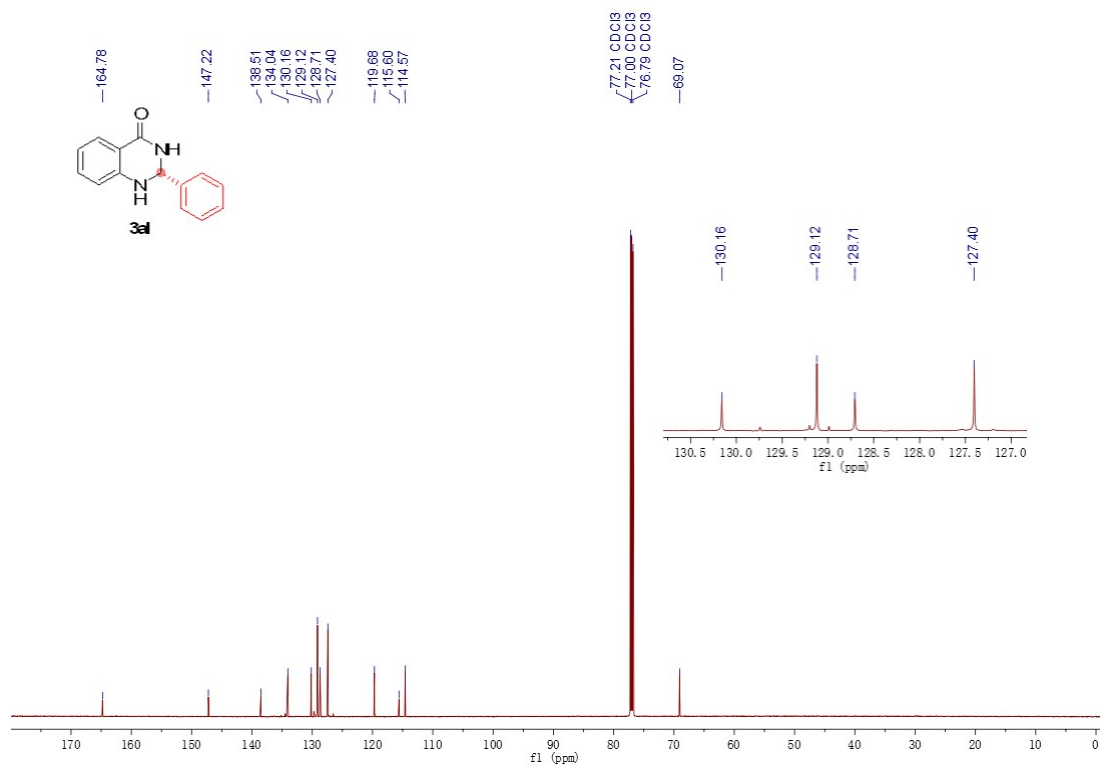

Fig.S 35  $^{13}\text{C}$  NMR of compound **3al**

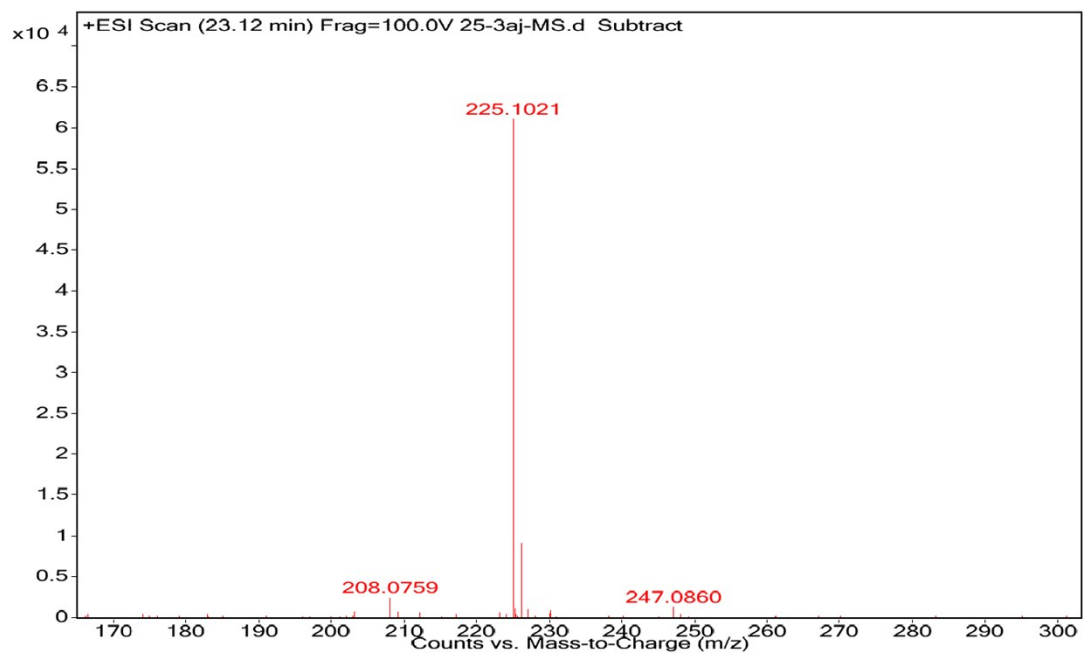

Fig.S 36 HR-MS of compound **3al**

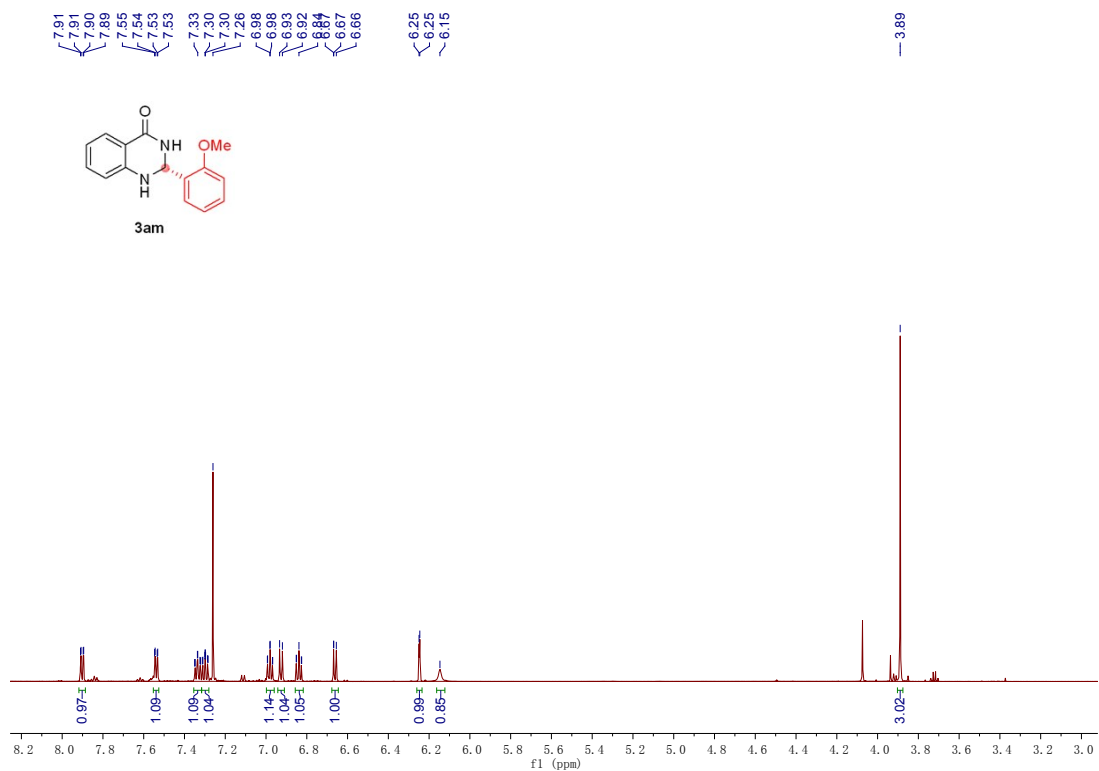

Fig.S 37 <sup>1</sup>H NMR of compound **3am**

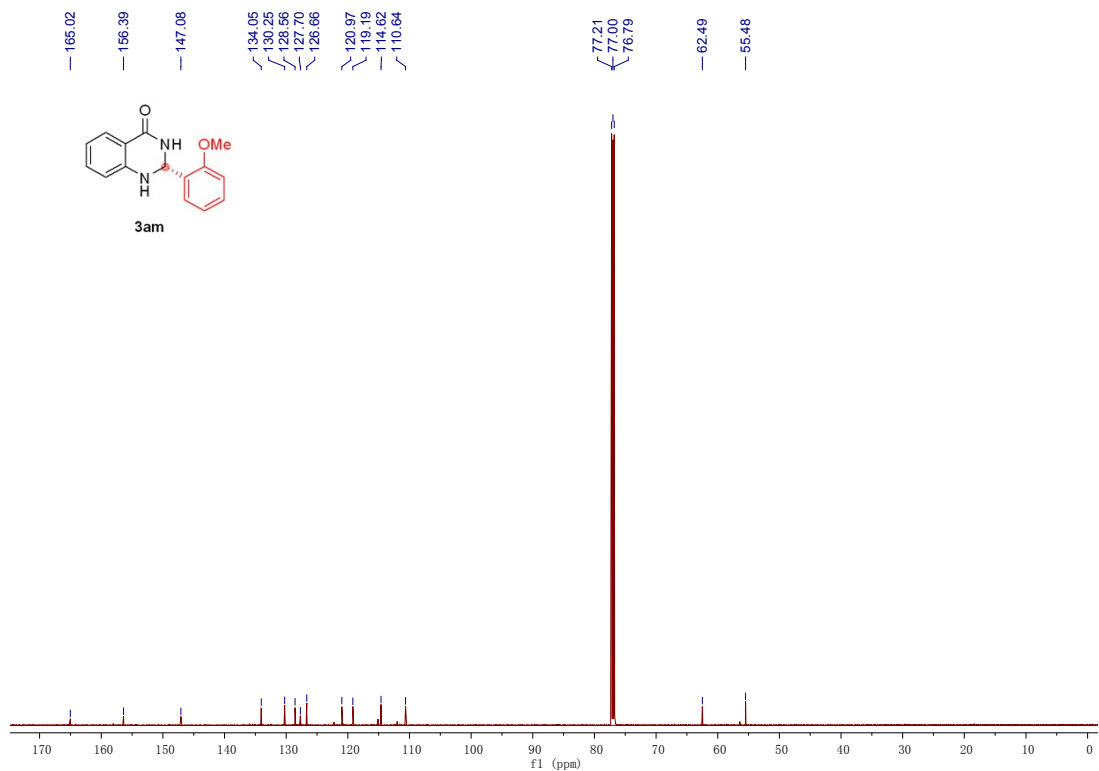

Fig.S 38 <sup>13</sup>C NMR of compound **3am**

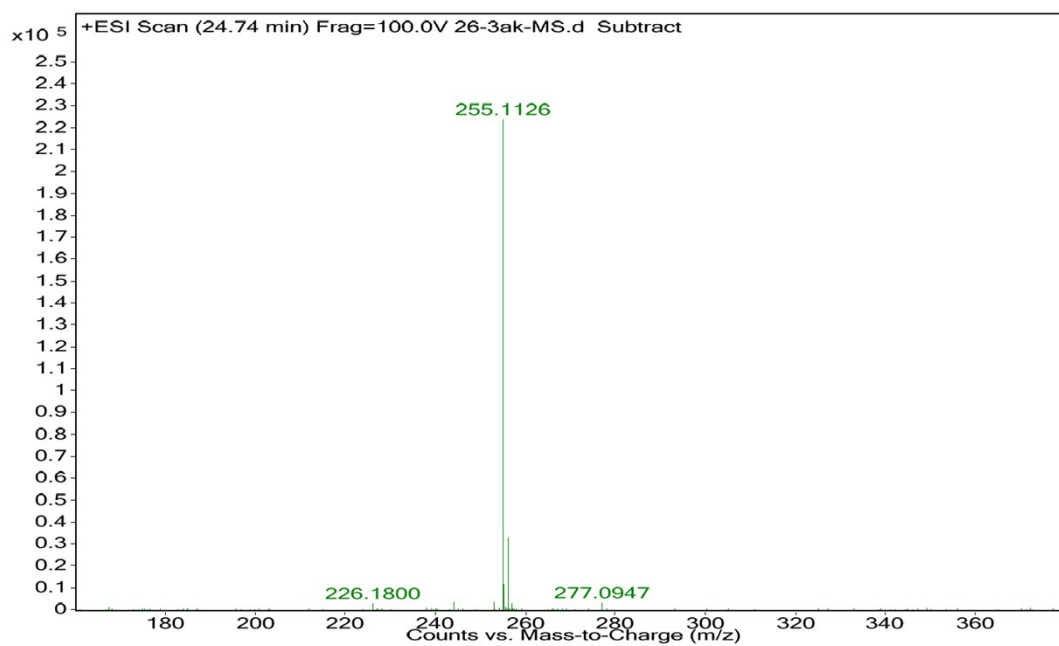

Fig.S 39 HR-MS of compound **3am**

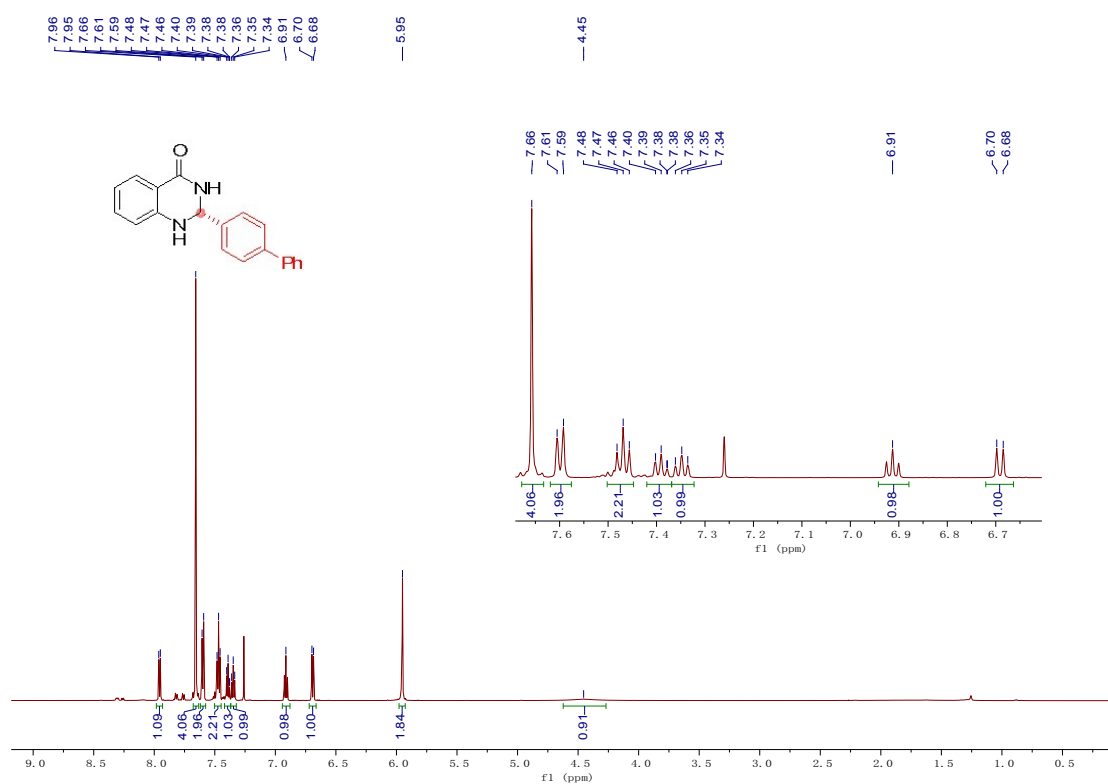

Fig.S 40 <sup>1</sup>H NMR of compound **3am**

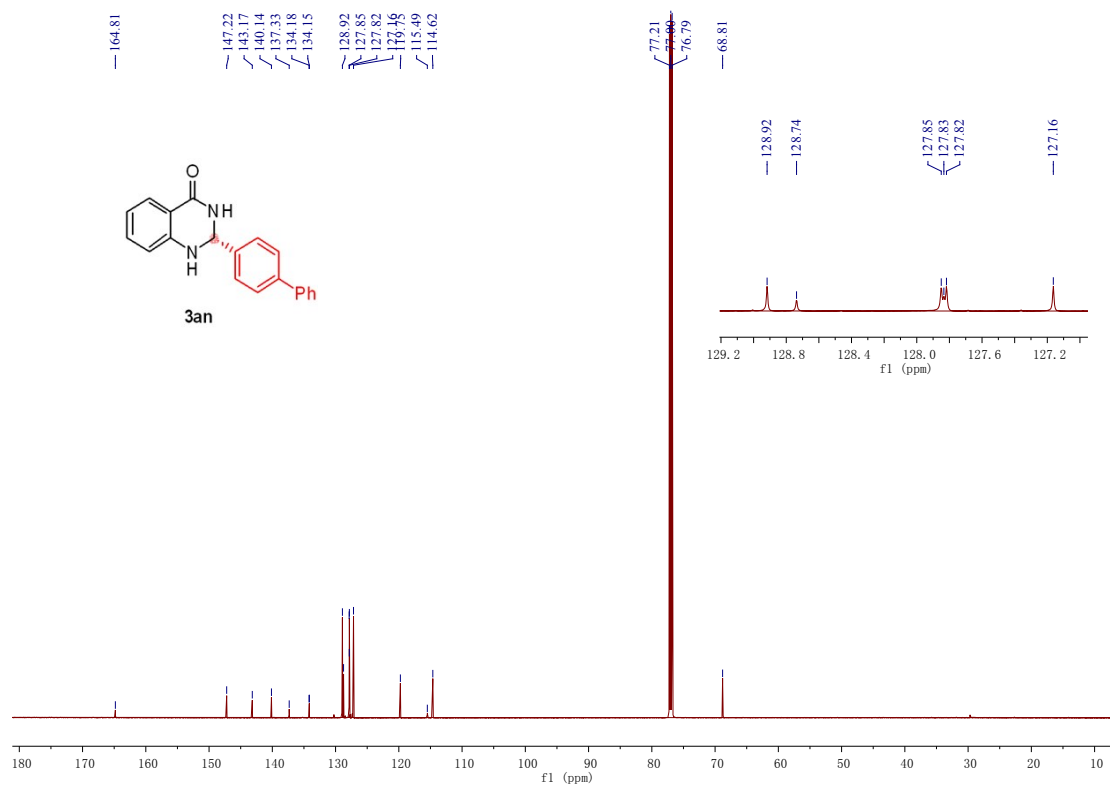

Fig.S 41 <sup>13</sup>C NMR of compound **3an**

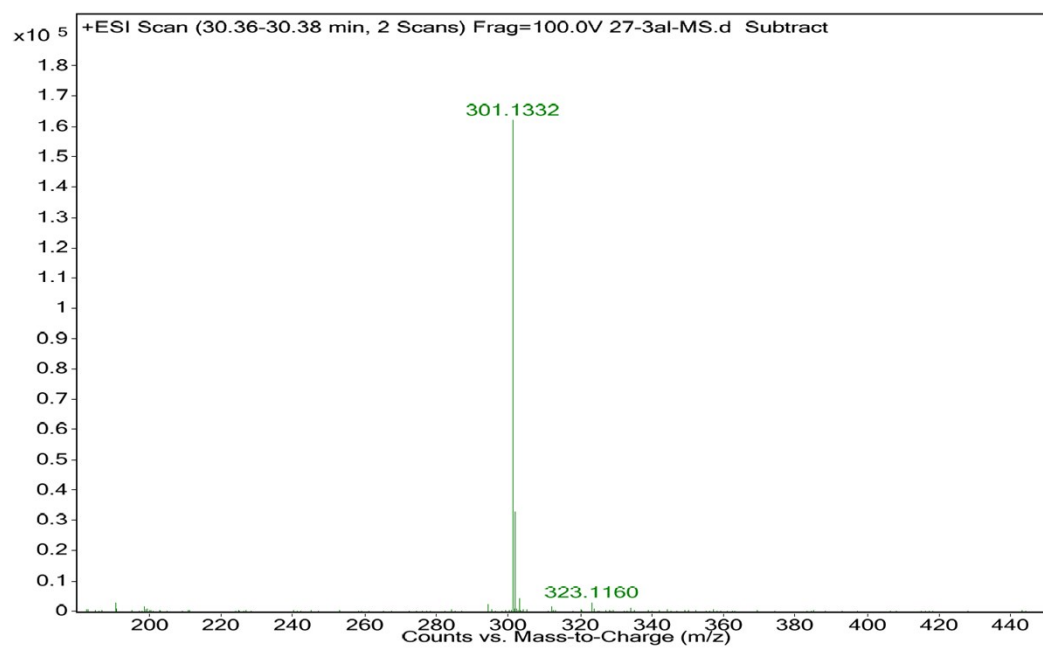

Fig.S 42 HR-MS of compound **3an**

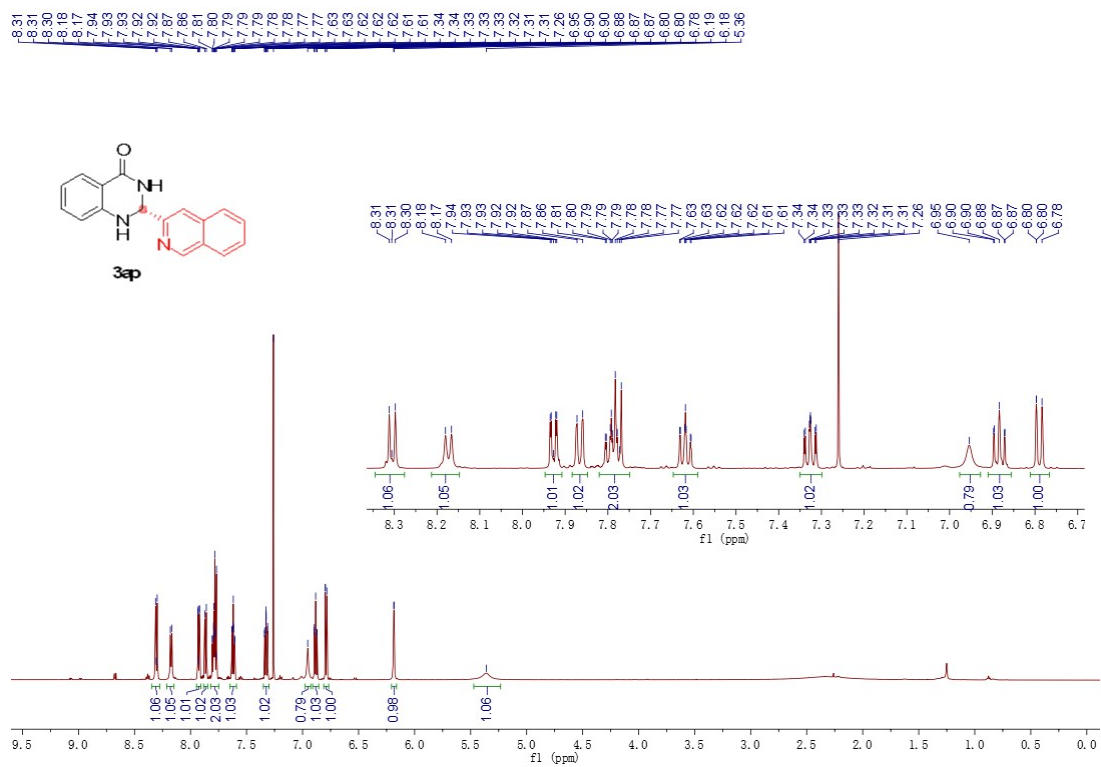

Fig.S 43 <sup>1</sup>H NMR of compound 3ao

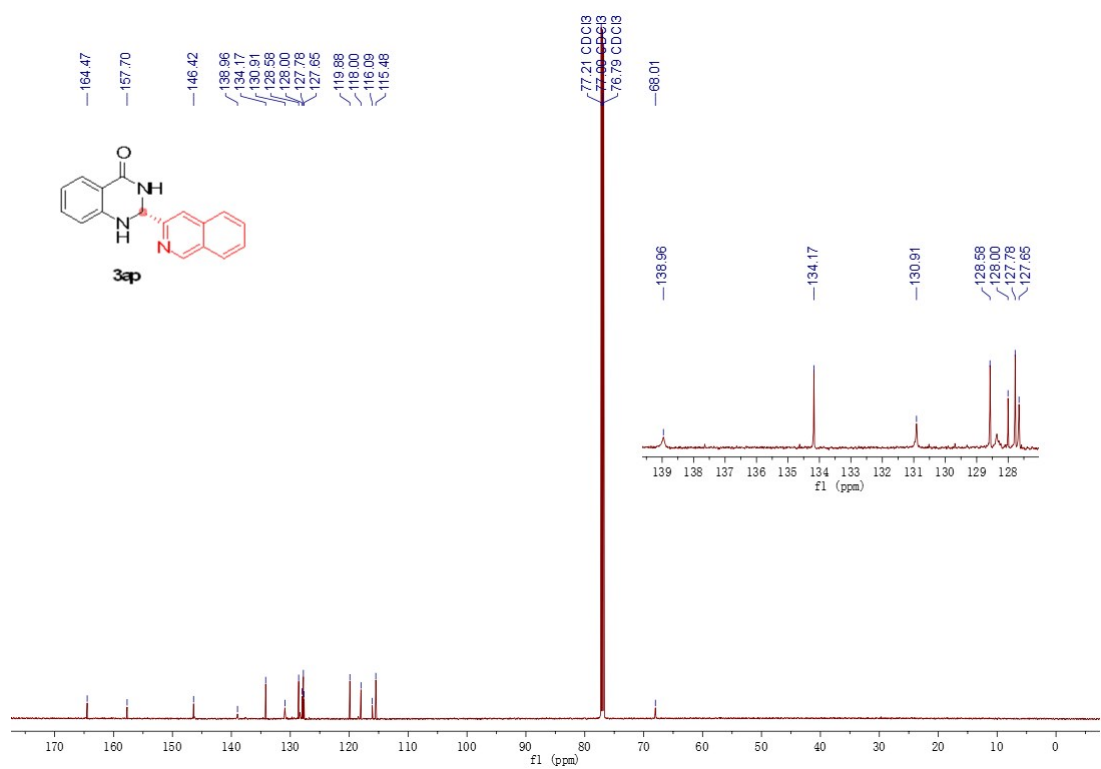

Fig.S 44 <sup>13</sup>C NMR of compound 3ao

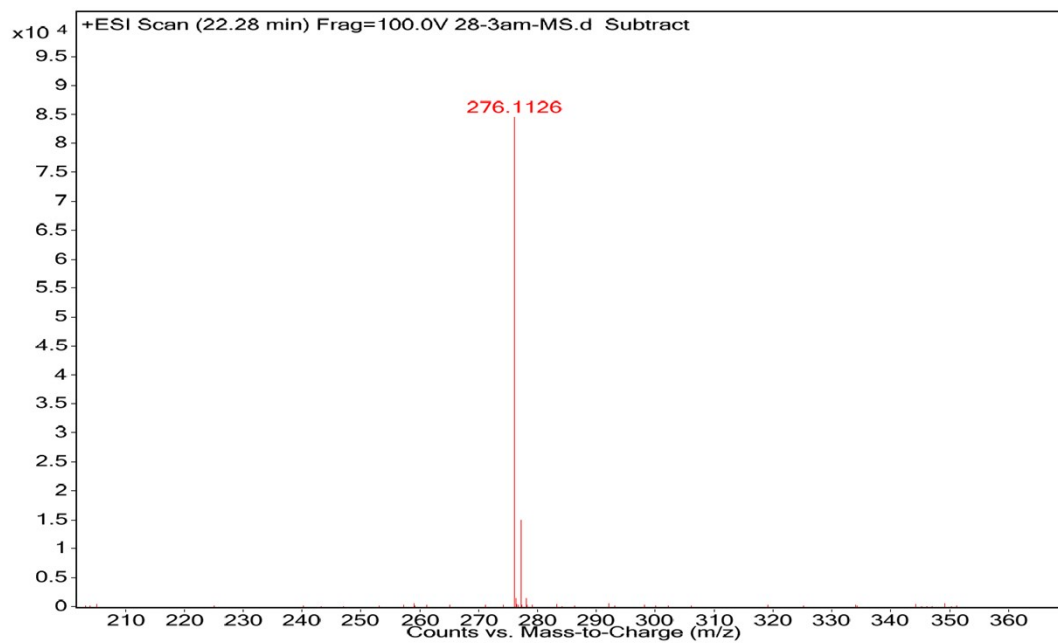

Fig.S 45 HR-MS of compound **3ao**

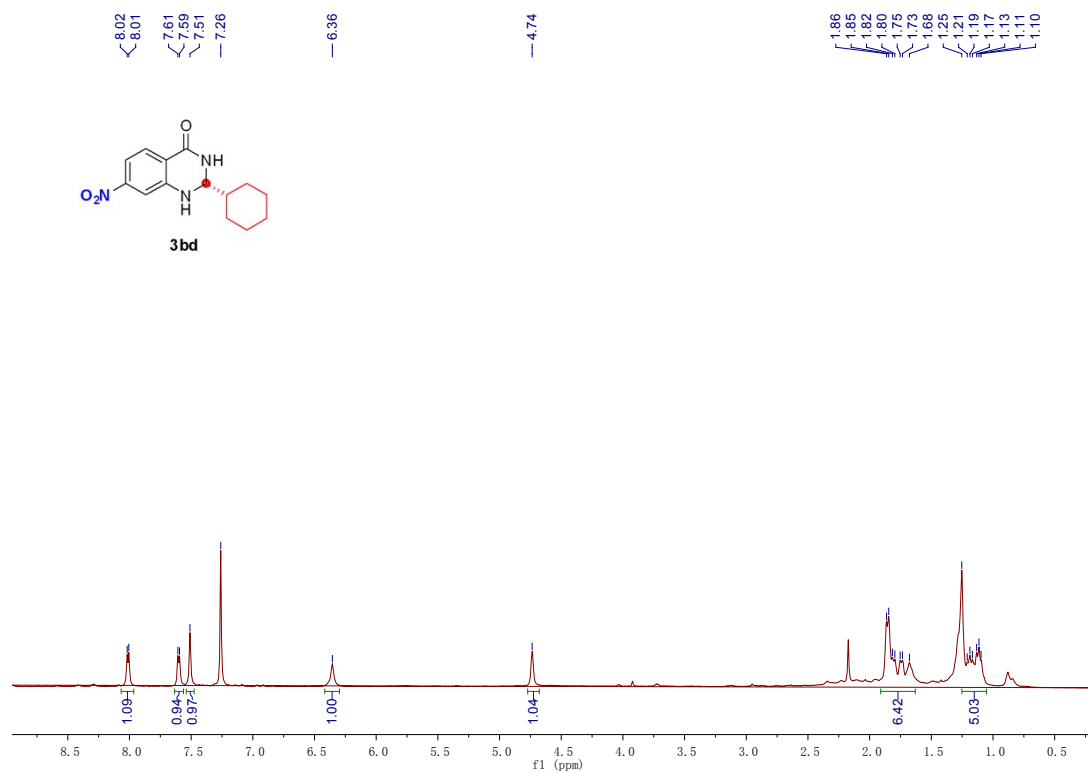

Fig.S 46  $^1\text{H}$  NMR of compound **3bd**

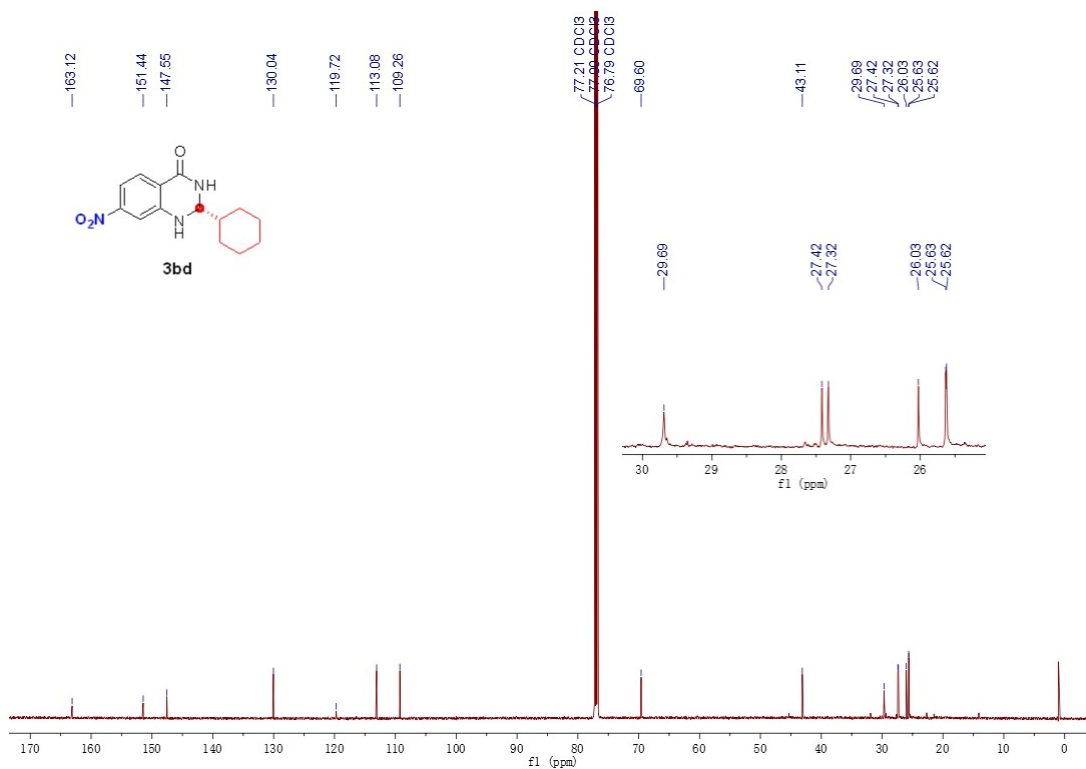

Fig.S 47 <sup>13</sup>C NMR of compound **3bd**

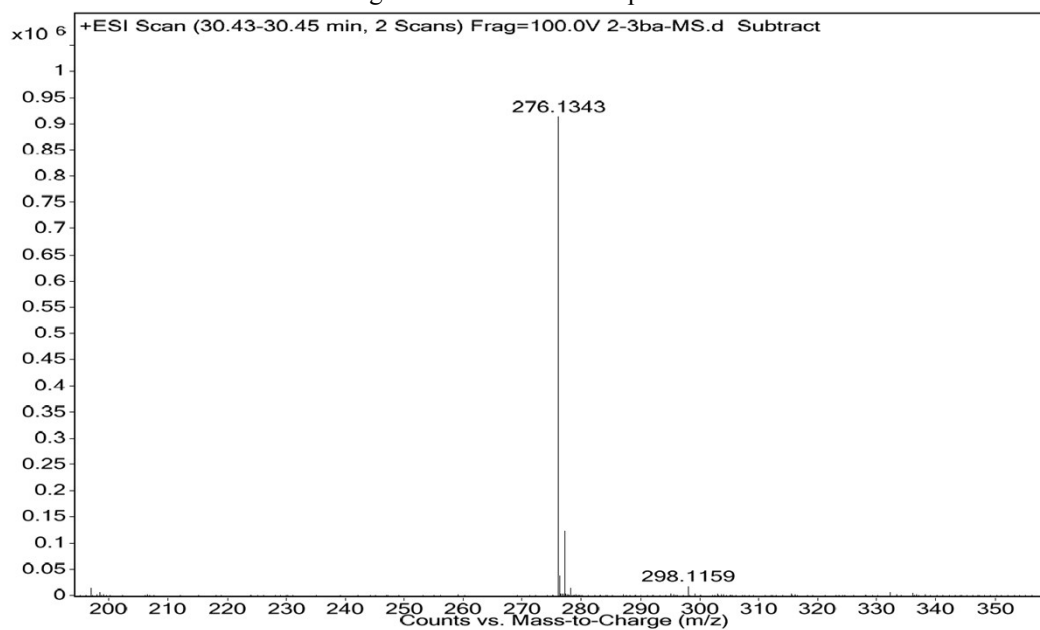

Fig.S 48 <sup>1</sup>H HRMS of compound **3bd**



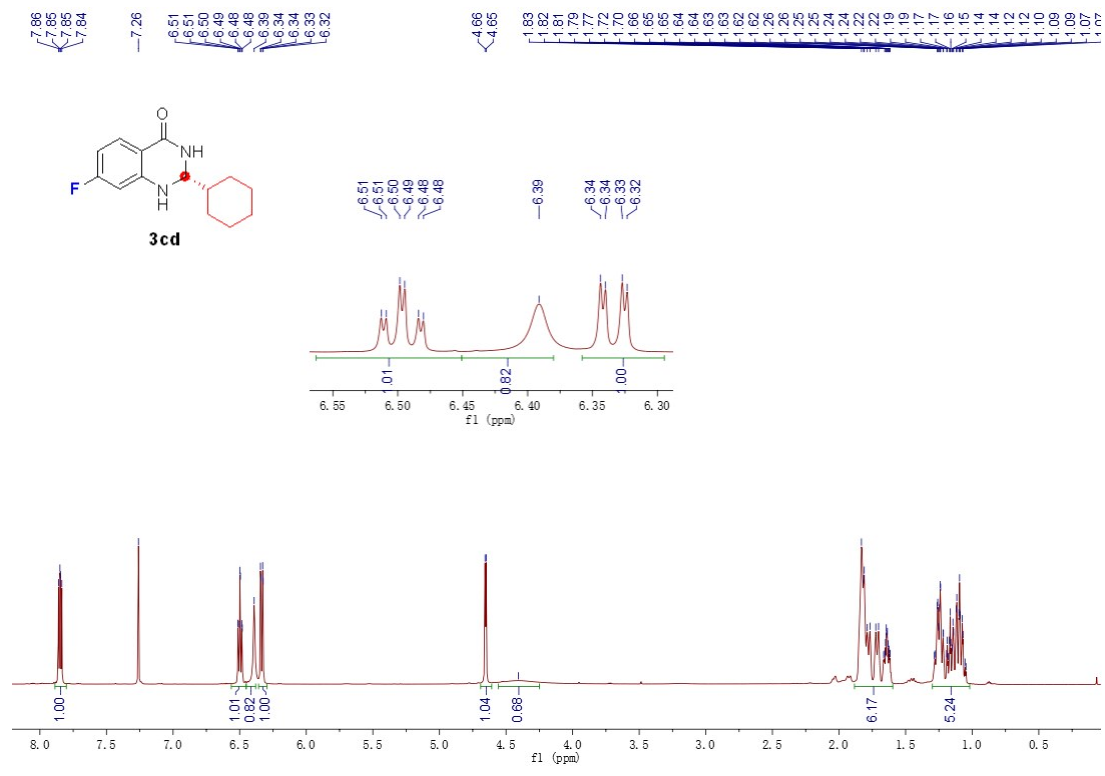

Fig.S 49 <sup>1</sup>H NMR of compound 3cd

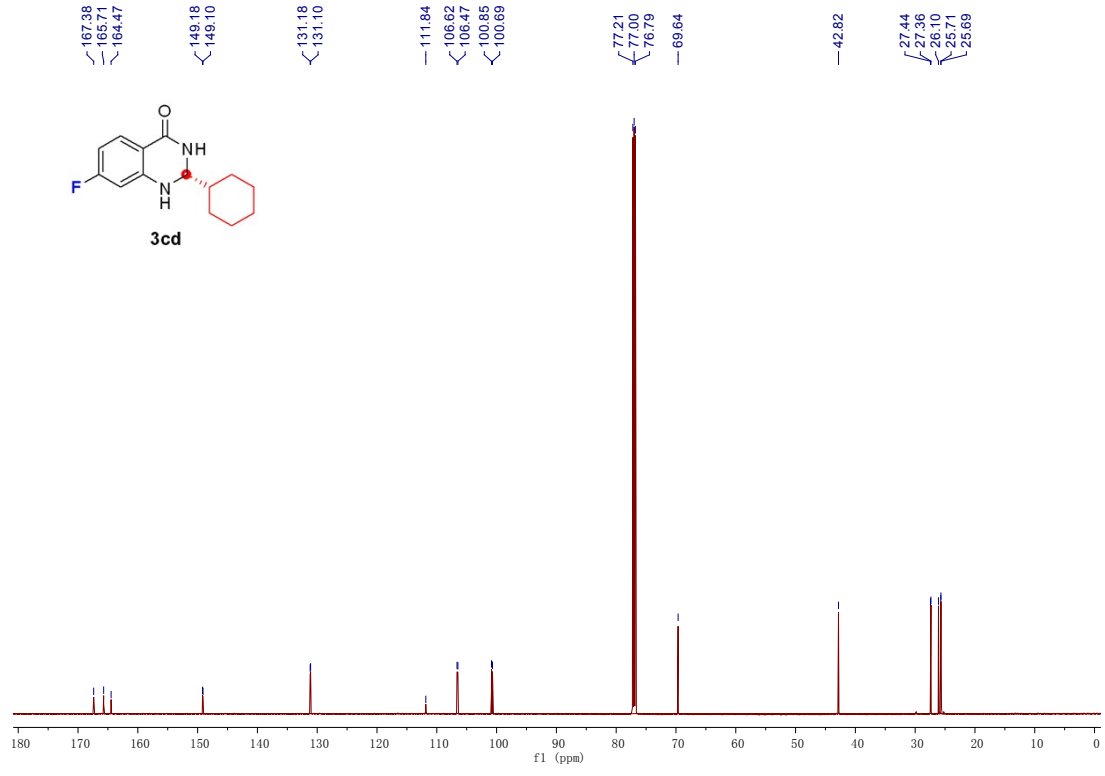

Fig.S 50 <sup>13</sup>C NMR of compound 3cd

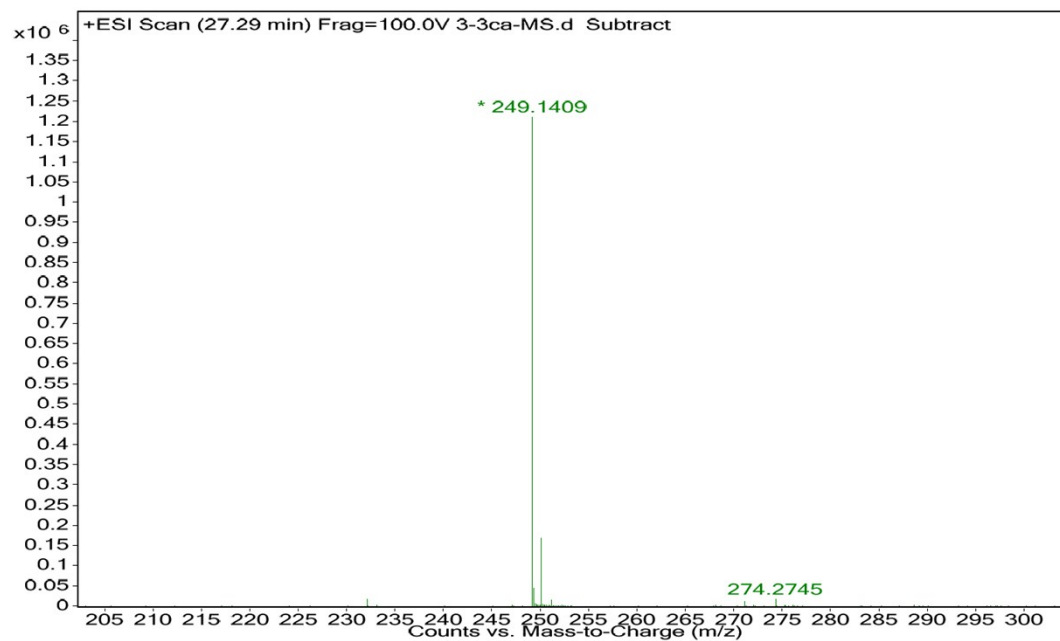

Fig.S 51 <sup>1</sup>H NMR of compound 3cd

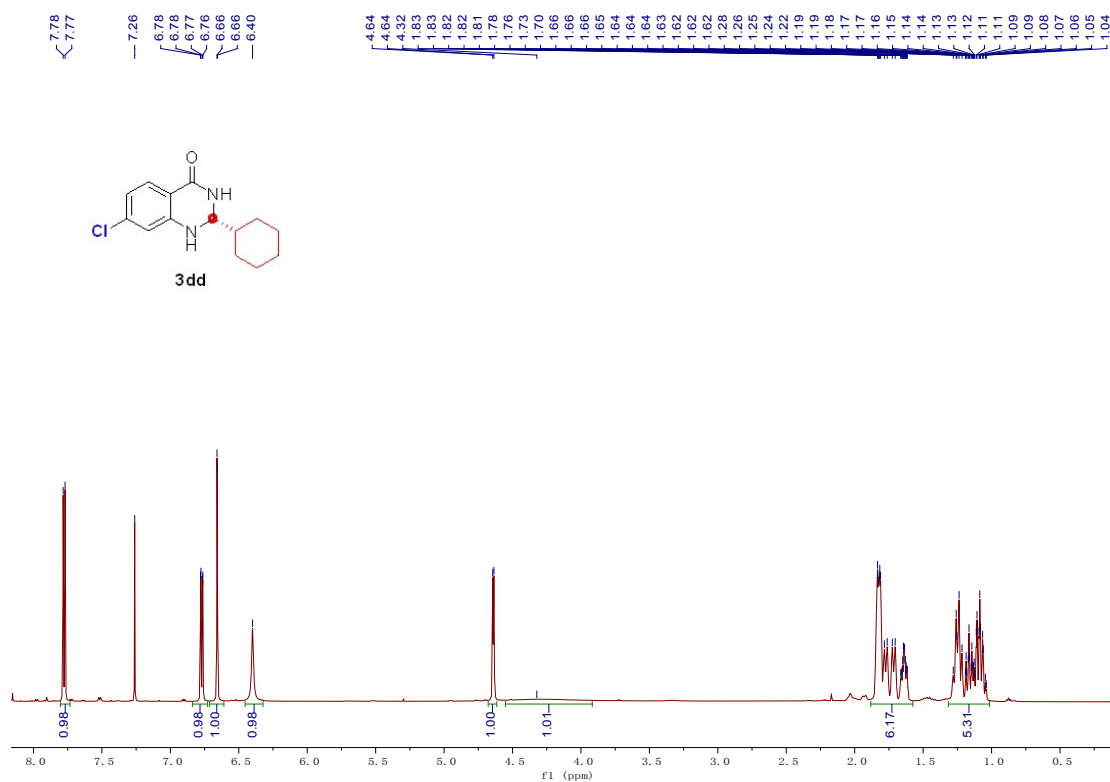

Fig.S 52 <sup>1</sup>H NMR of compound 3dd

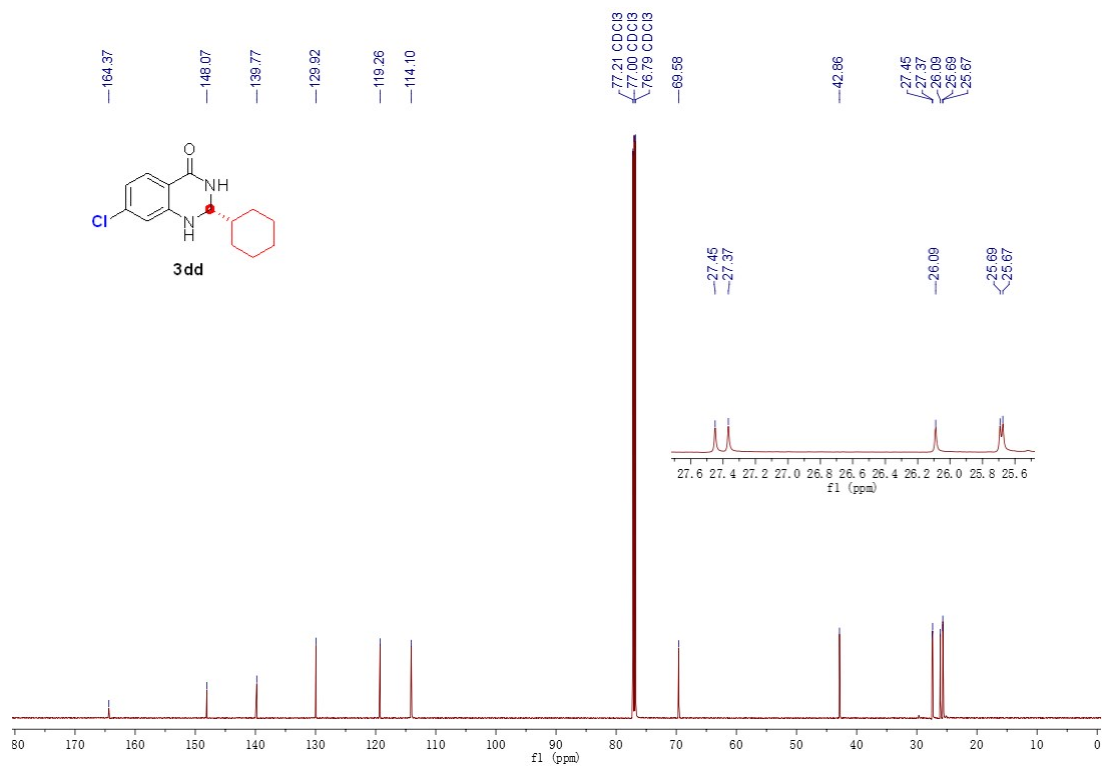

Fig.S 53 <sup>13</sup>C NMR of compound **3dd**

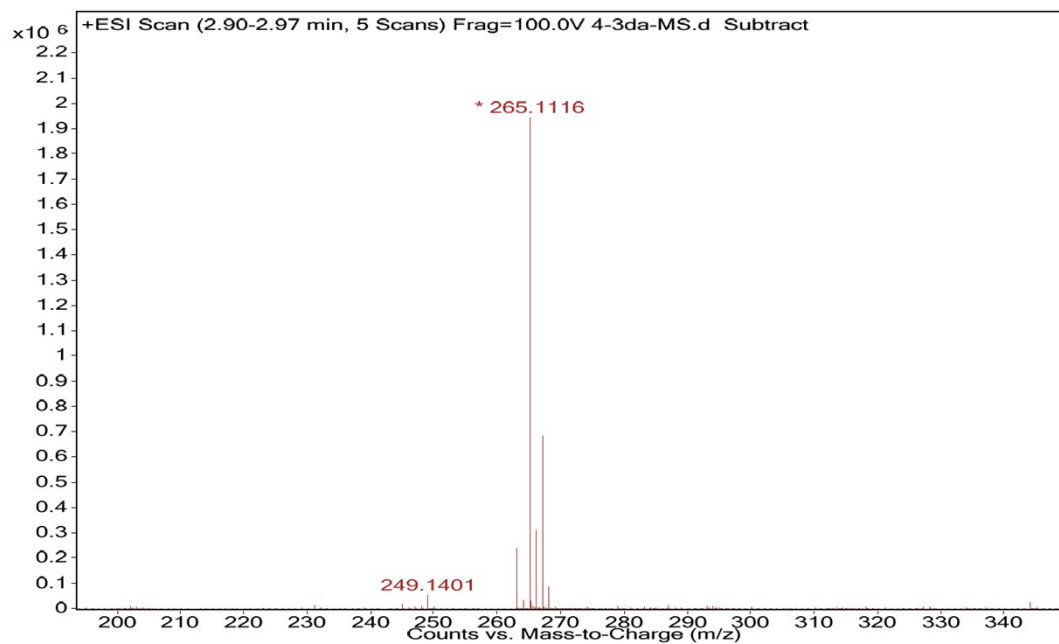

Fig.S 54 <sup>1</sup>H NMR of compound **3dd**



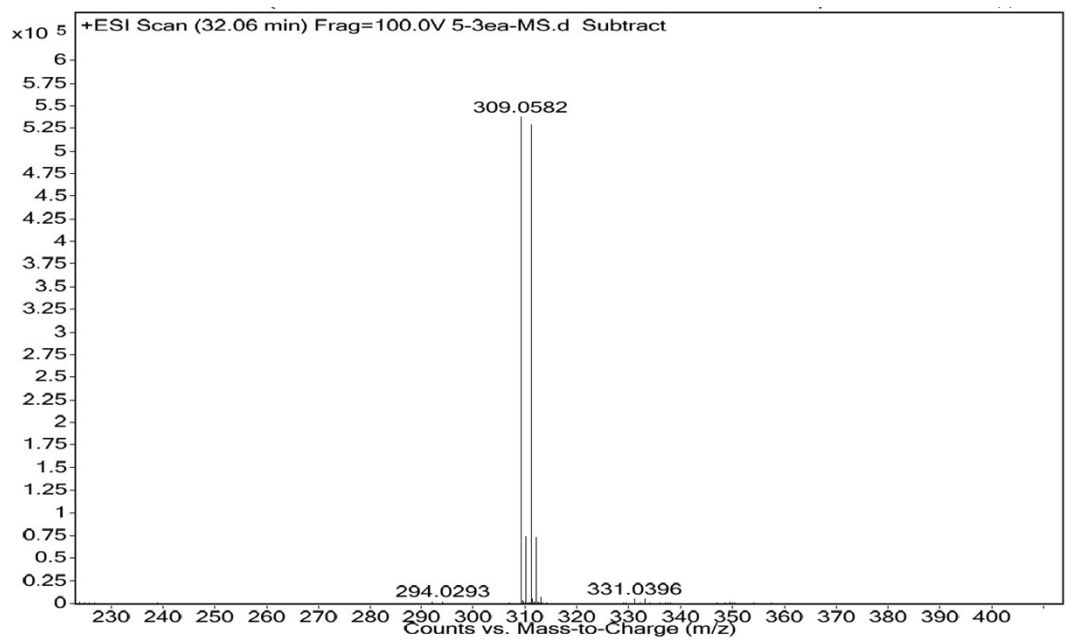

Fig.S 57 <sup>1</sup>H NMR of compound 3ed

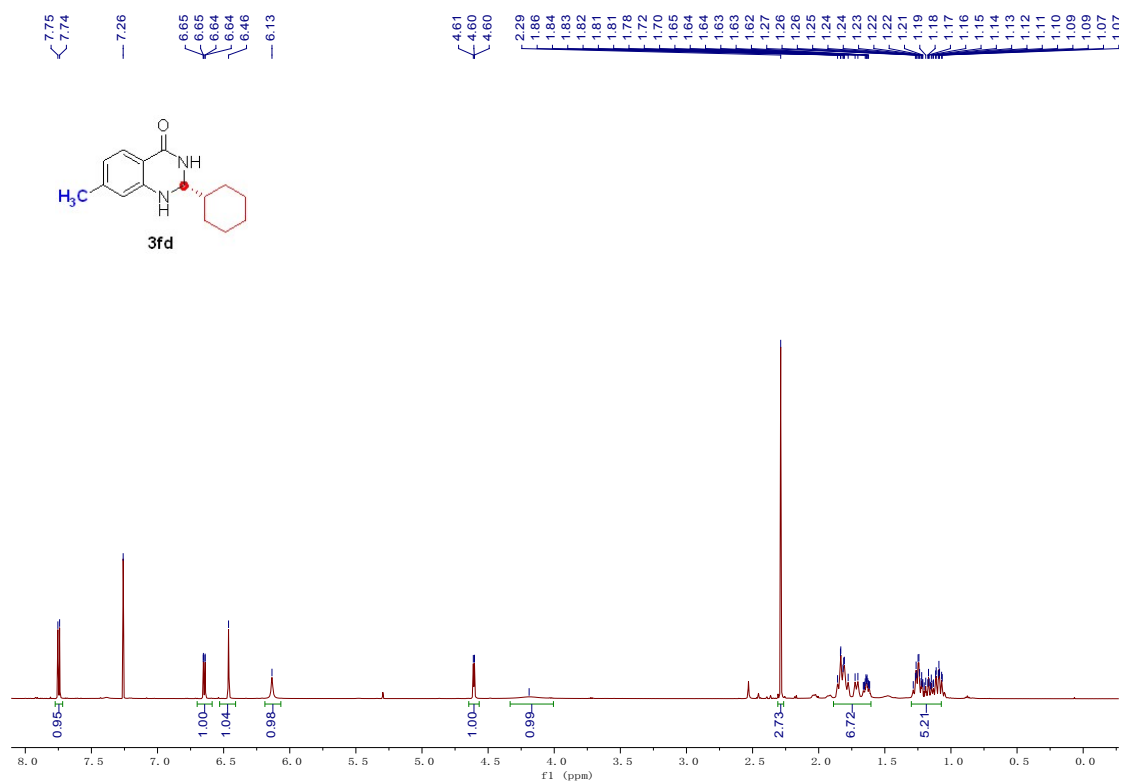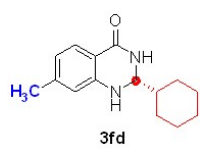

Fig.S 58 <sup>1</sup>H NMR of compound 3fd

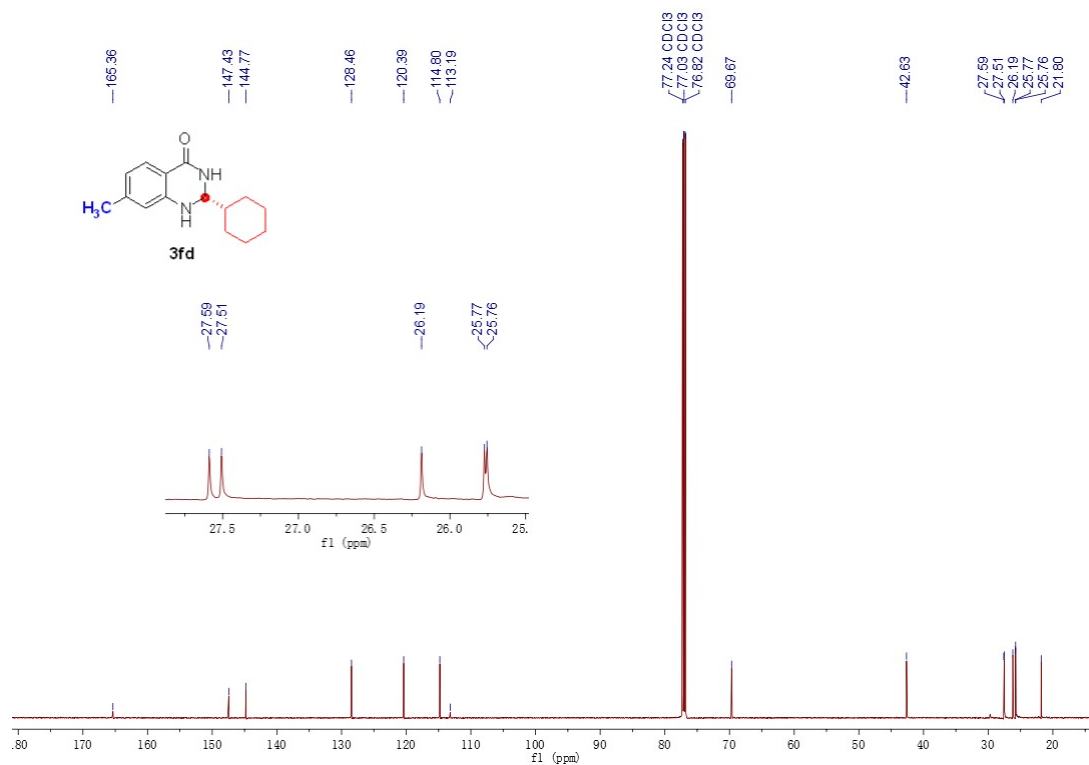

Fig.S 59 <sup>13</sup>C NMR of compound **3fd**

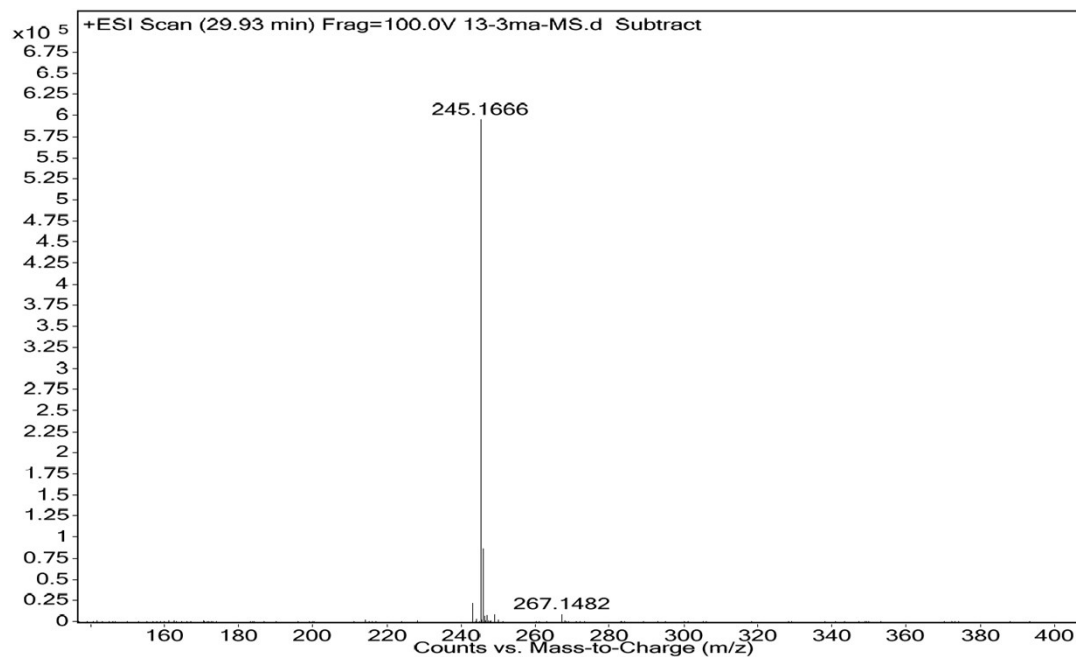

Fig.S 60 <sup>1</sup>H NMR of compound **3fd**

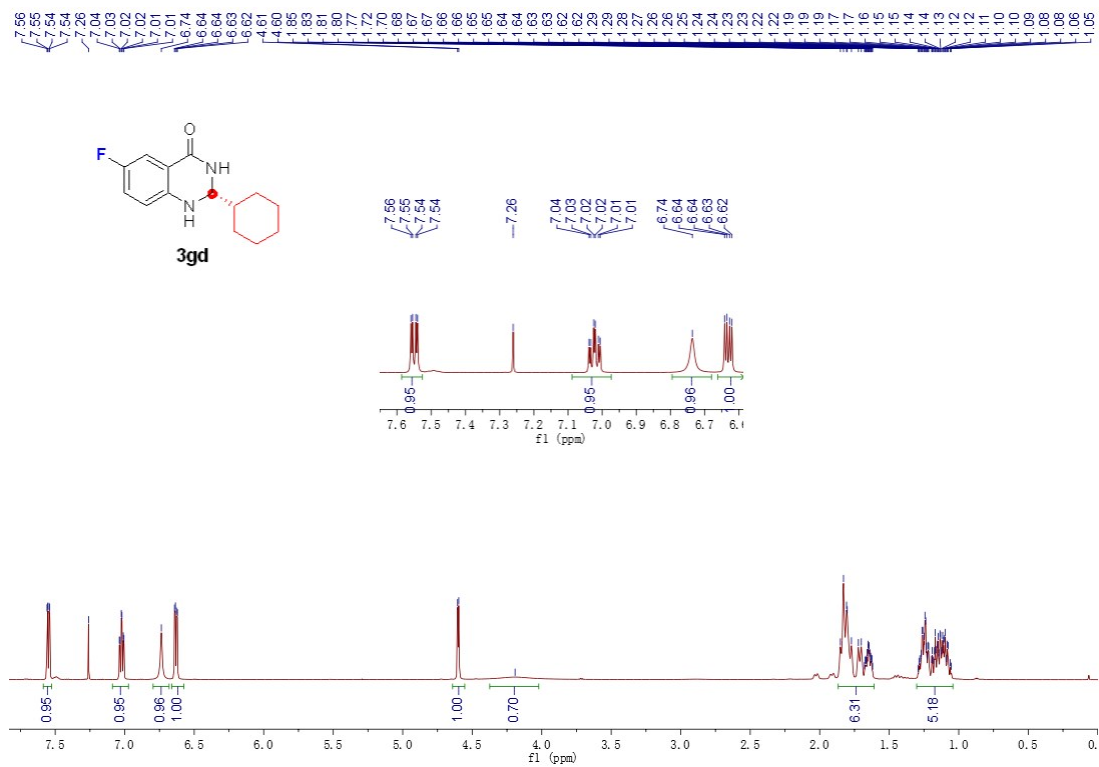

Fig.S 61 <sup>1</sup>H NMR of compound 3gd

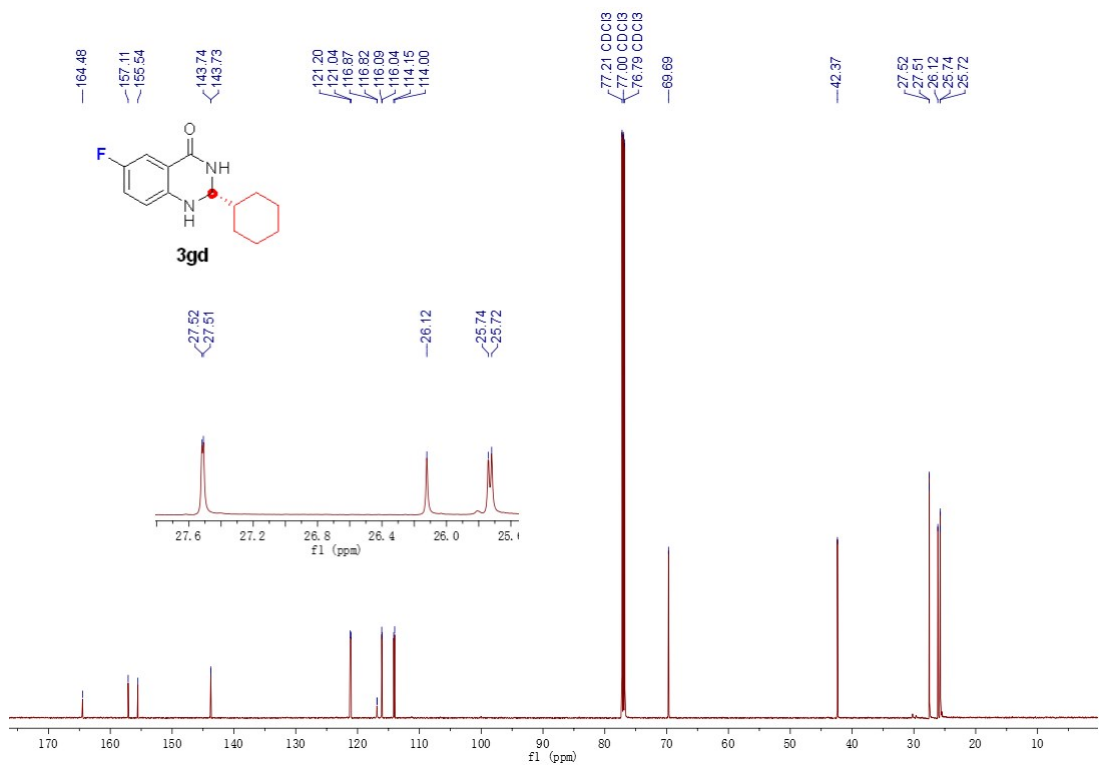

Fig.S 62 <sup>13</sup>C NMR of compound 3gd

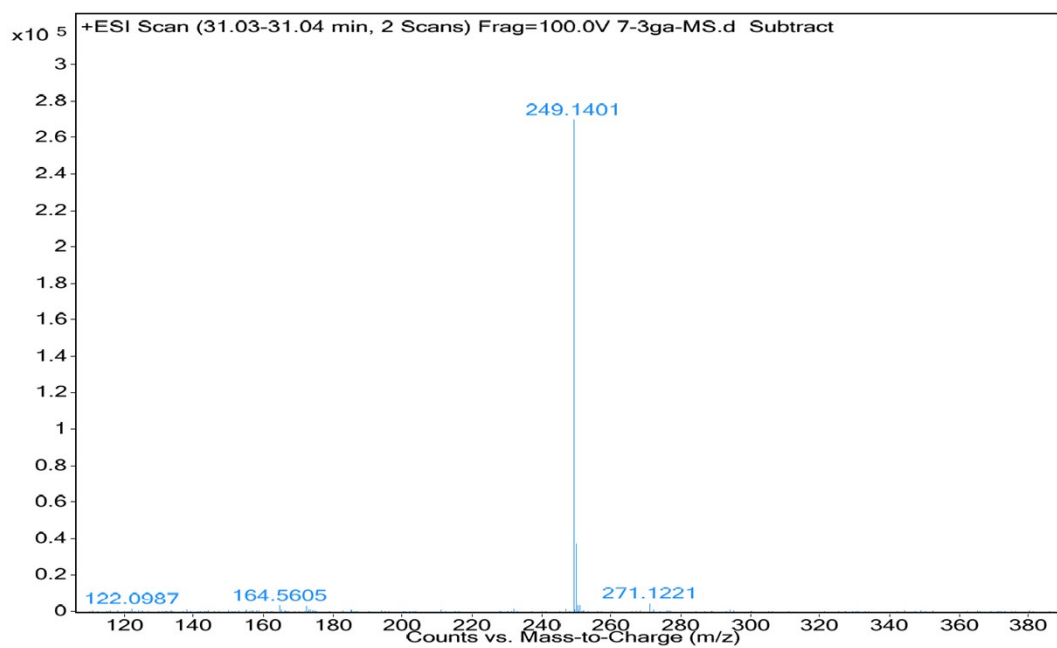

Fig.S 63 <sup>1</sup>H NMR of compound 3gd

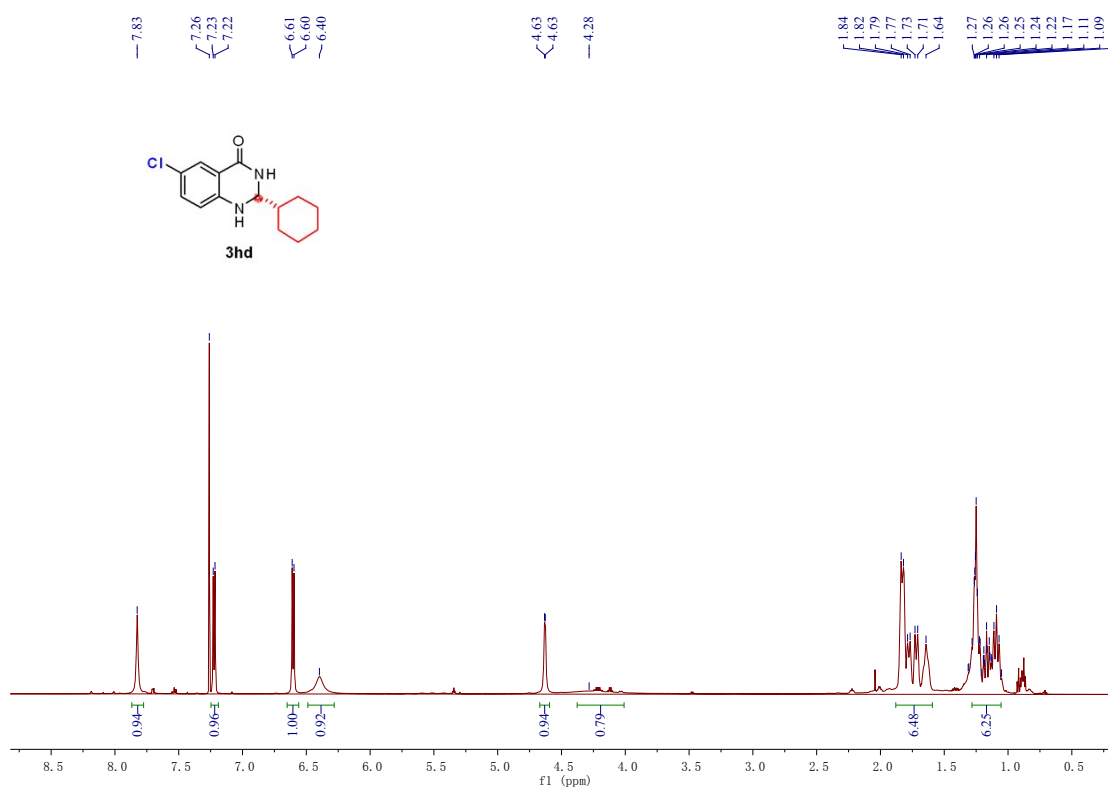

Fig.S 64 <sup>1</sup>H NMR of compound 3hd



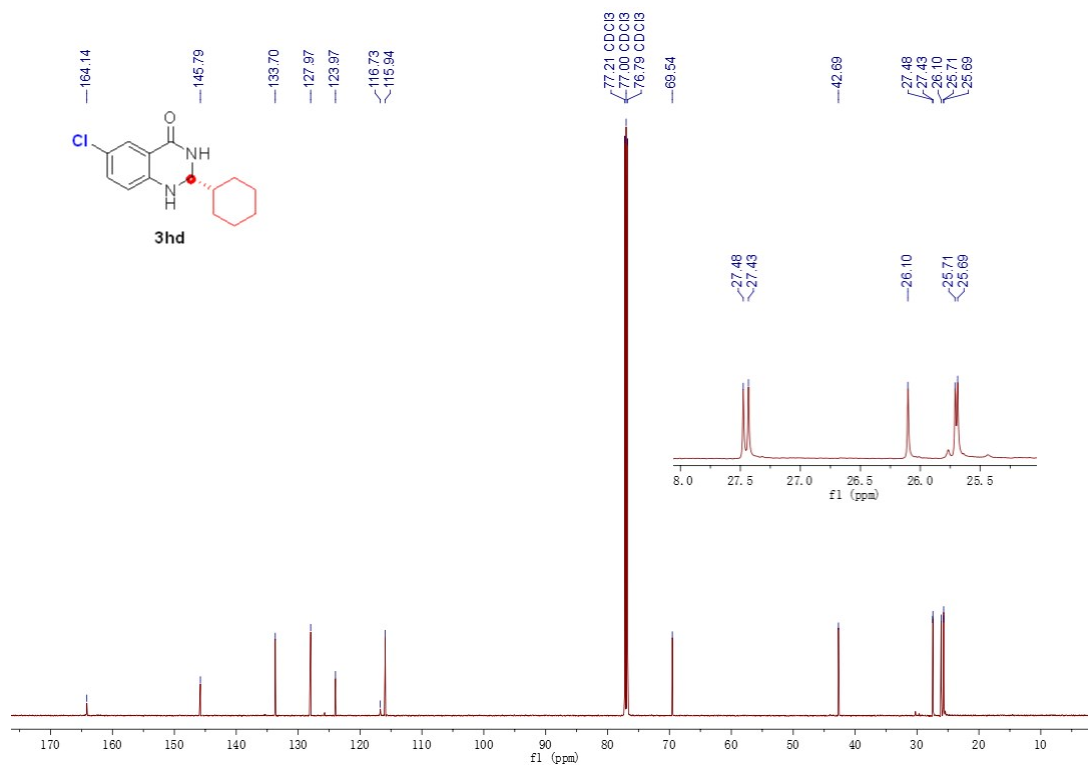

Fig.S 65 <sup>13</sup>C NMR of compound **3hd**

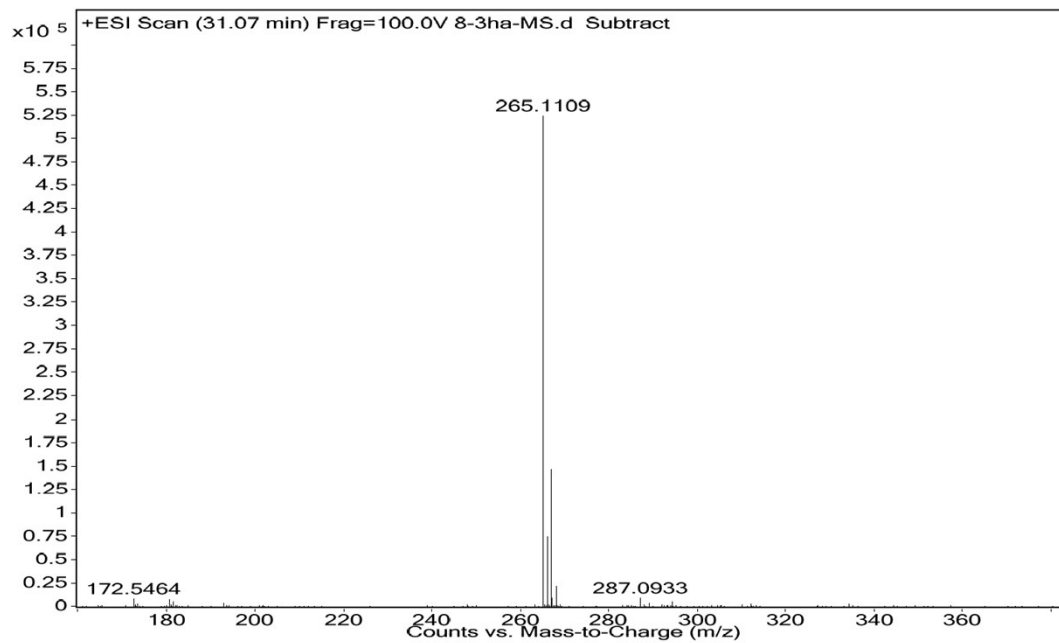

Fig.S 66 <sup>1</sup>H NMR of compound **3cd**

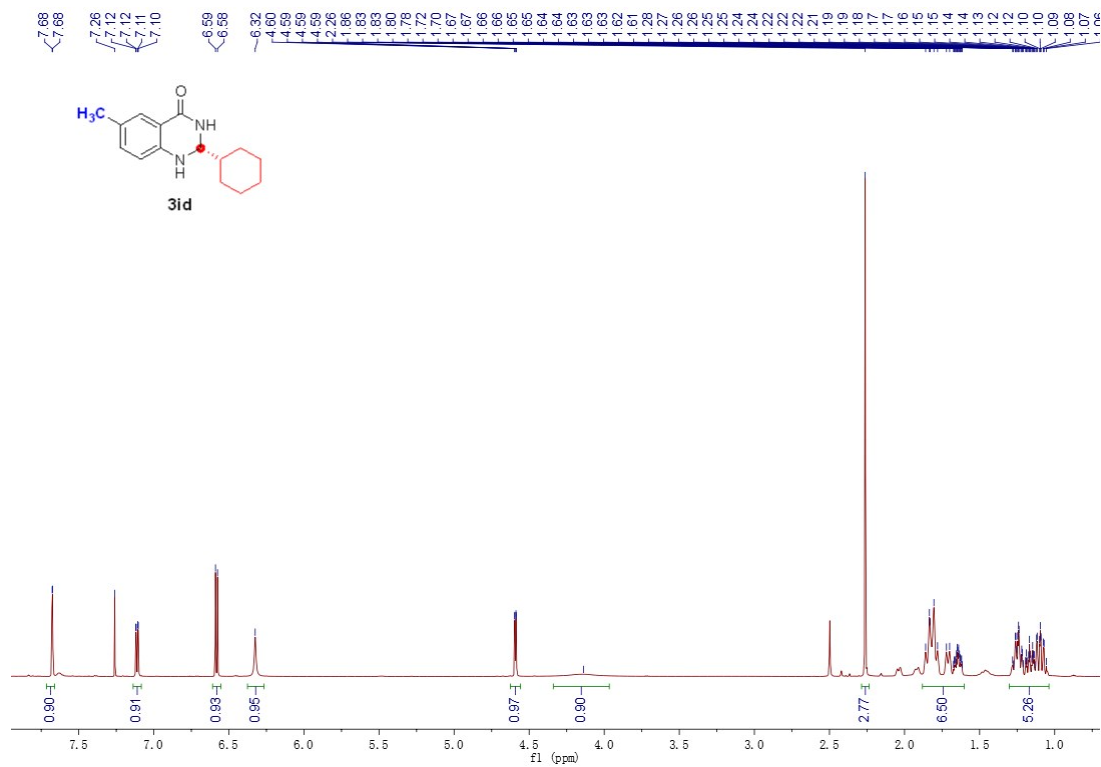

Fig.S 67 <sup>1</sup>H NMR of compound **3id**

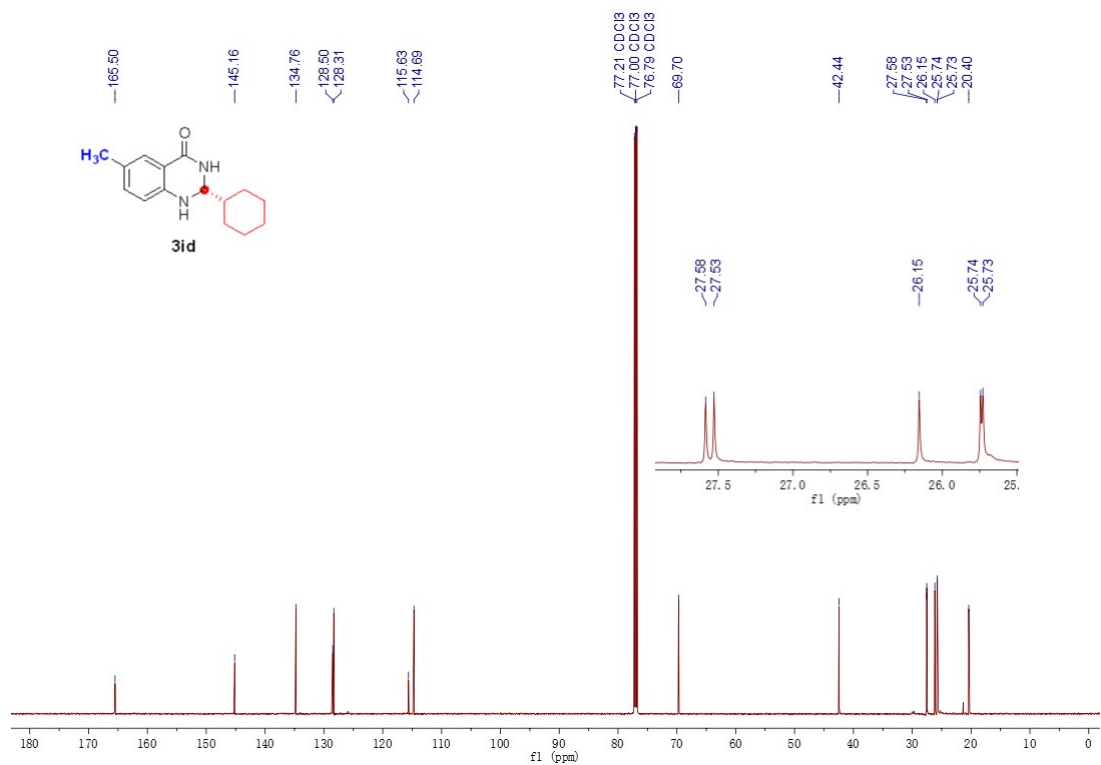

Fig.S 68 <sup>13</sup>C NMR of compound **3id**

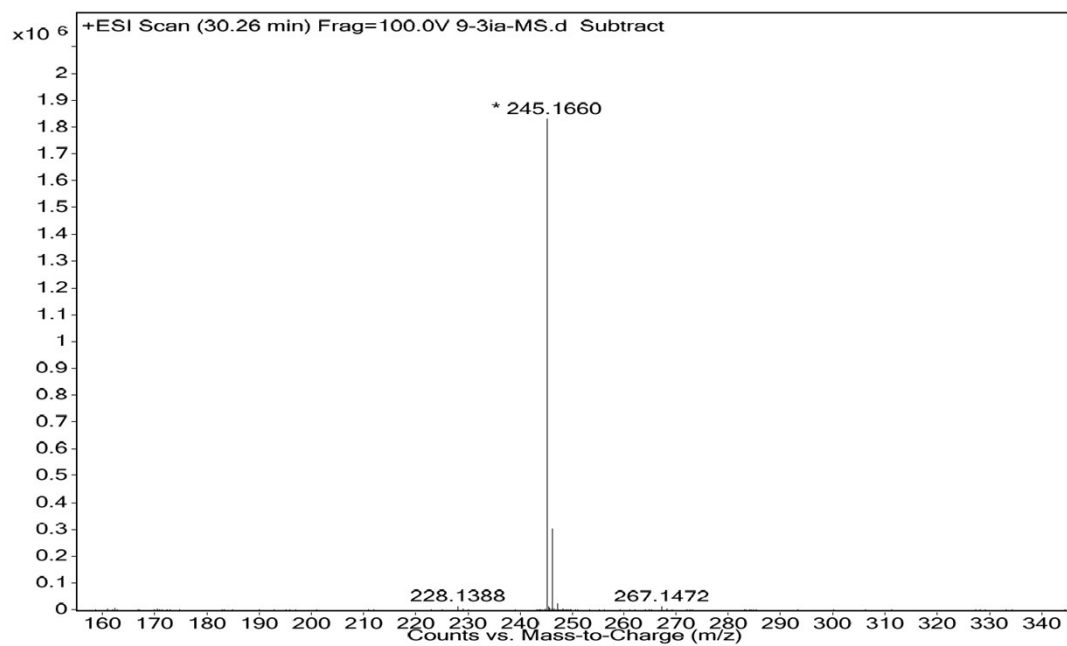

Fig.S 69 <sup>1</sup>H NMR of compound 3id

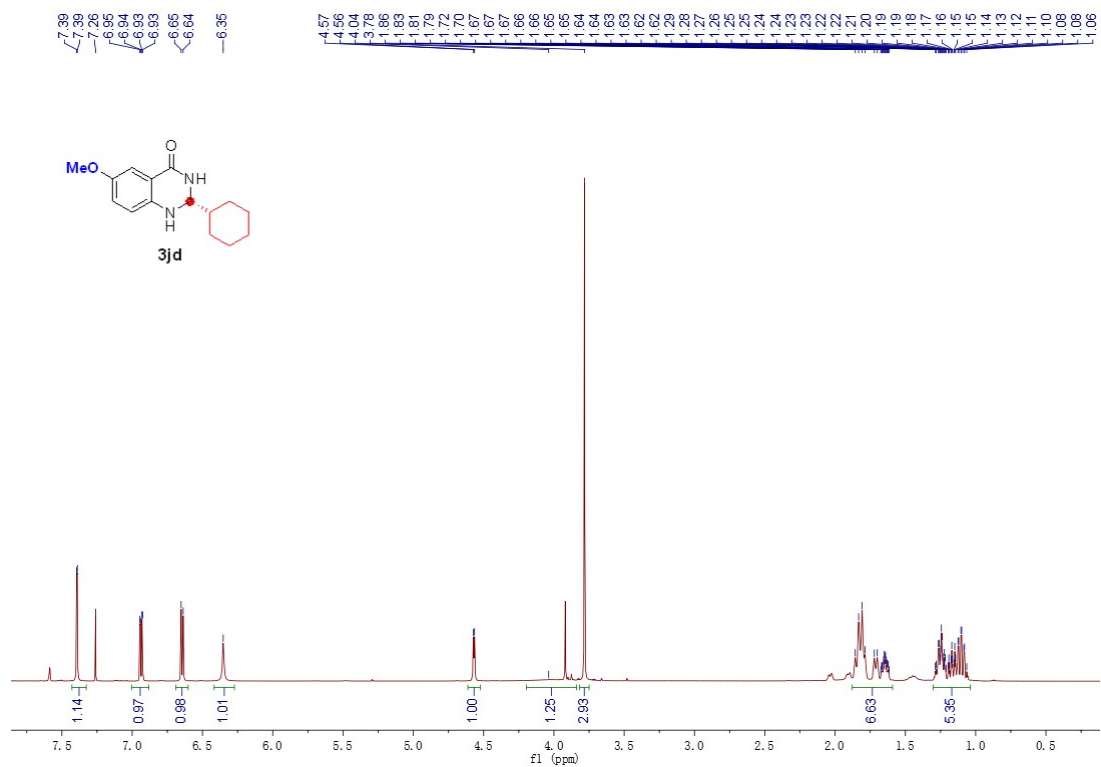

Fig.S 70 <sup>1</sup>H NMR of compound 3id

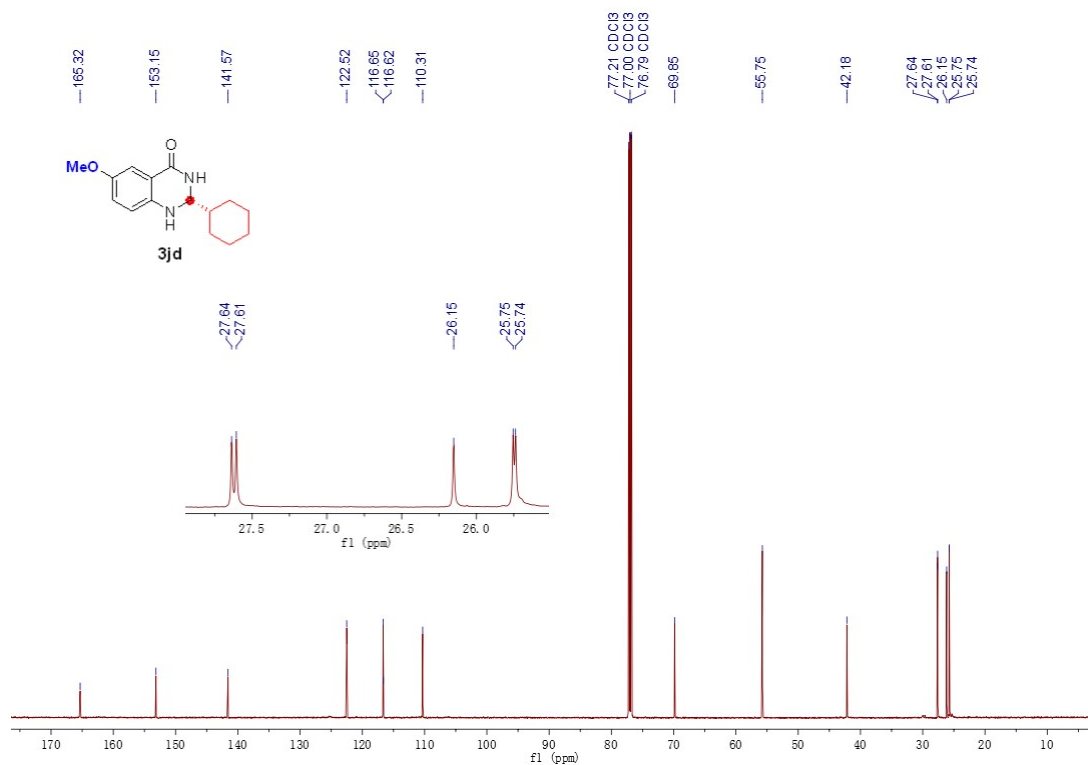

Fig.S 71 <sup>13</sup>C NMR of compound **3jd**

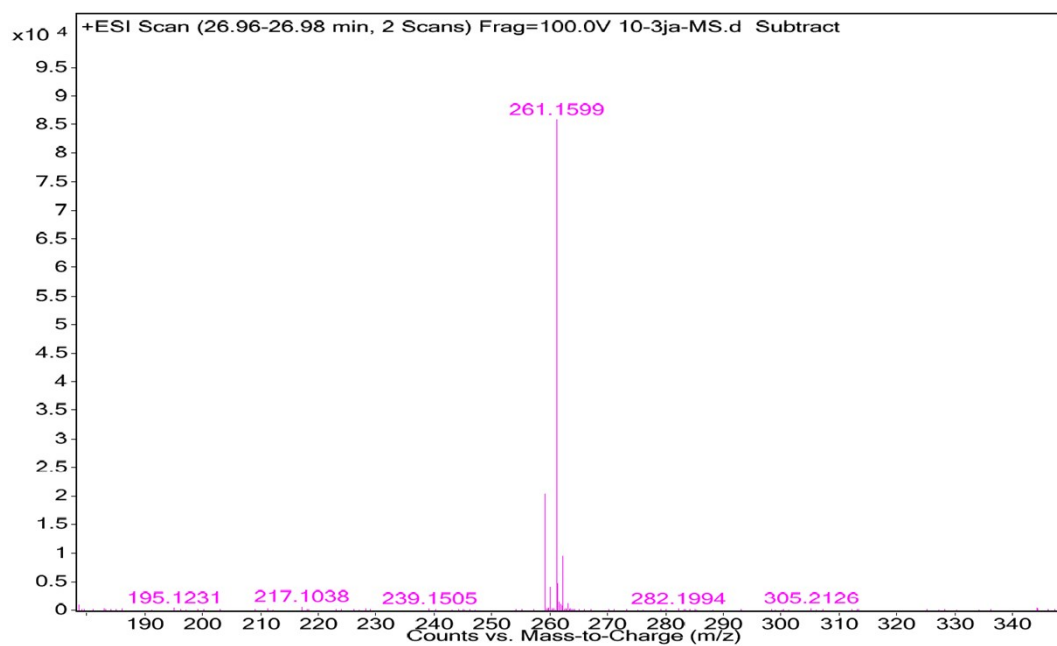

Fig.S 72 <sup>1</sup>H NMR of compound **3jd**

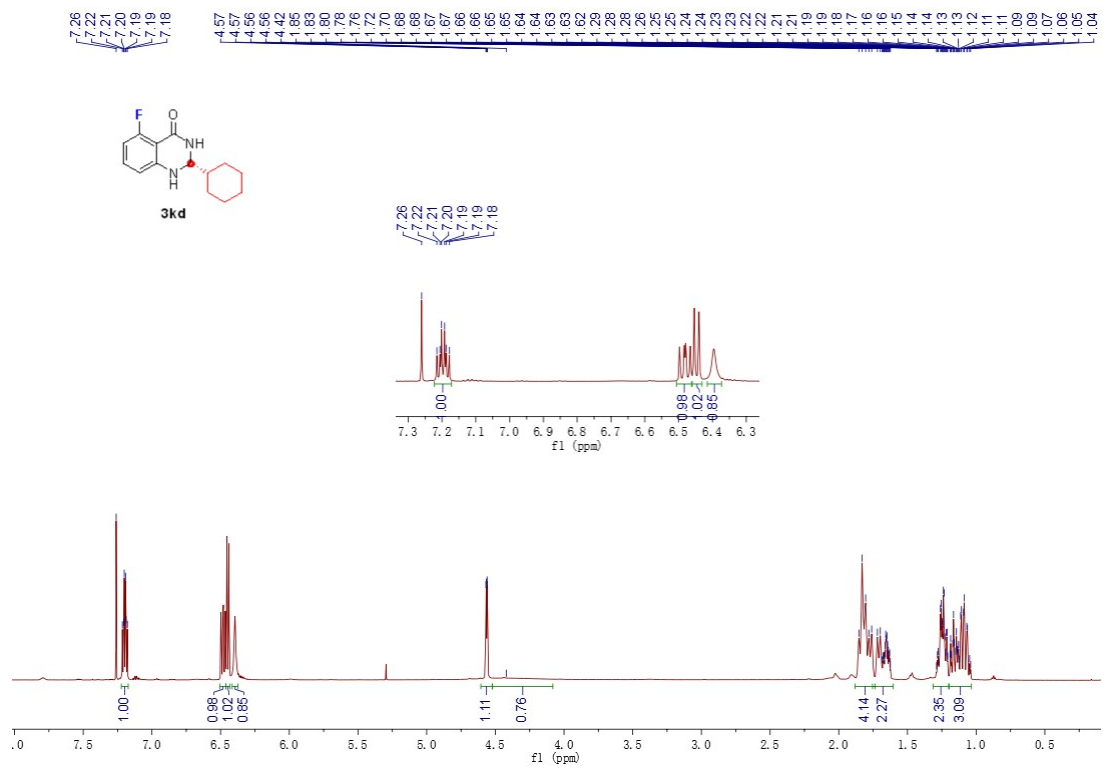

Fig.S 73 <sup>1</sup>H NMR of compound 3kd

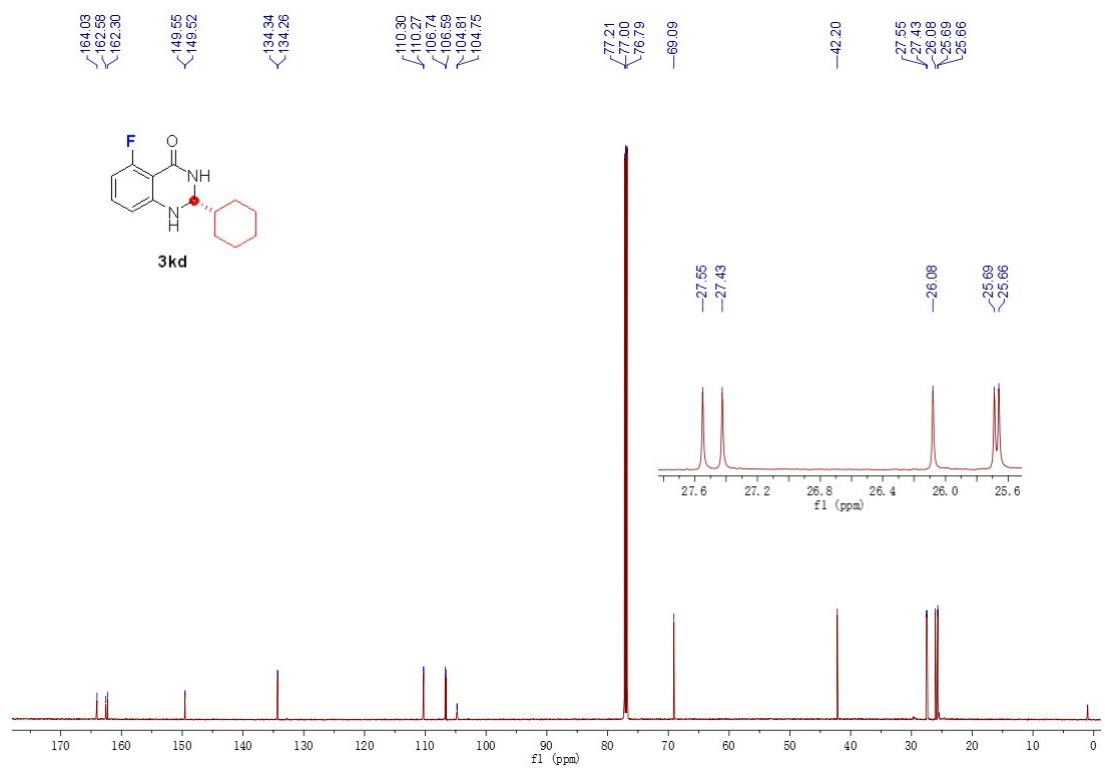

Fig.S 74 <sup>13</sup>C NMR of compound 3kd

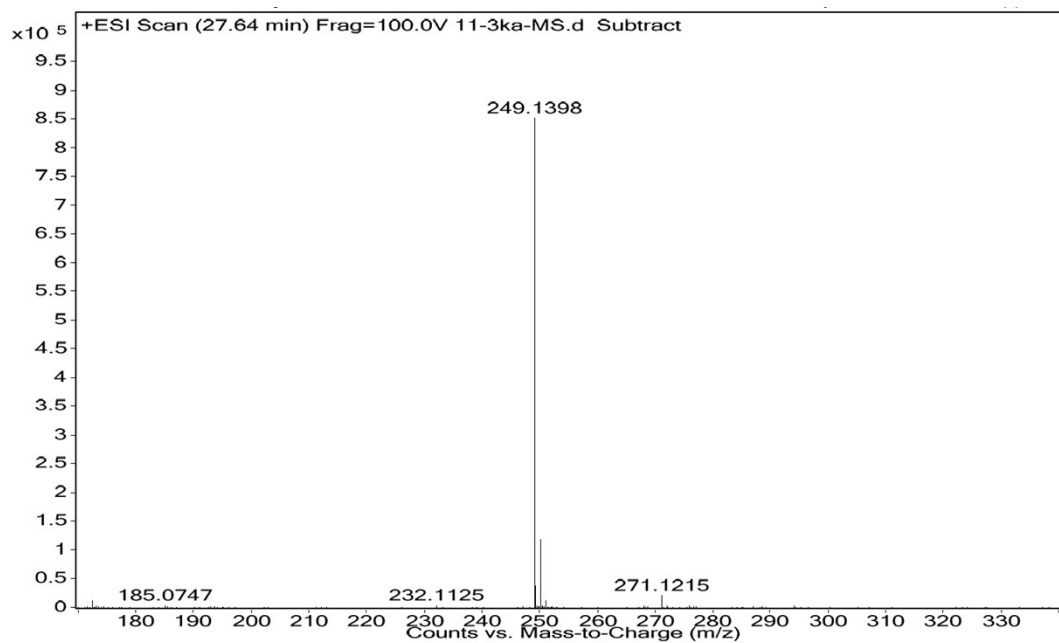

Fig.S 75 <sup>1</sup>H NMR of compound 3kd

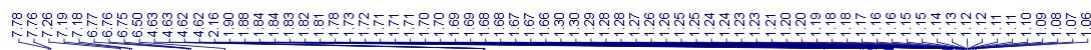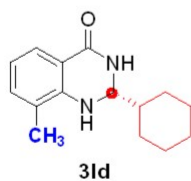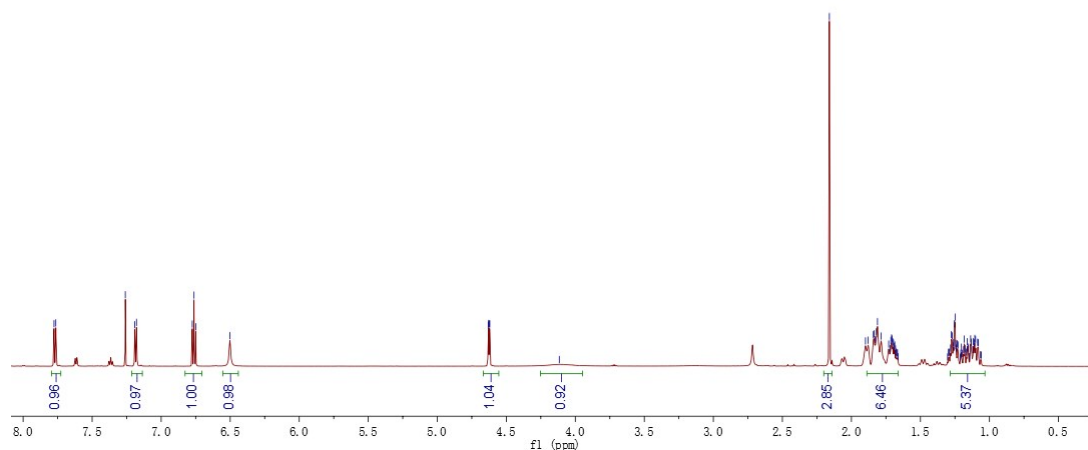

Fig.S 76 <sup>1</sup>H NMR of compound 3ld

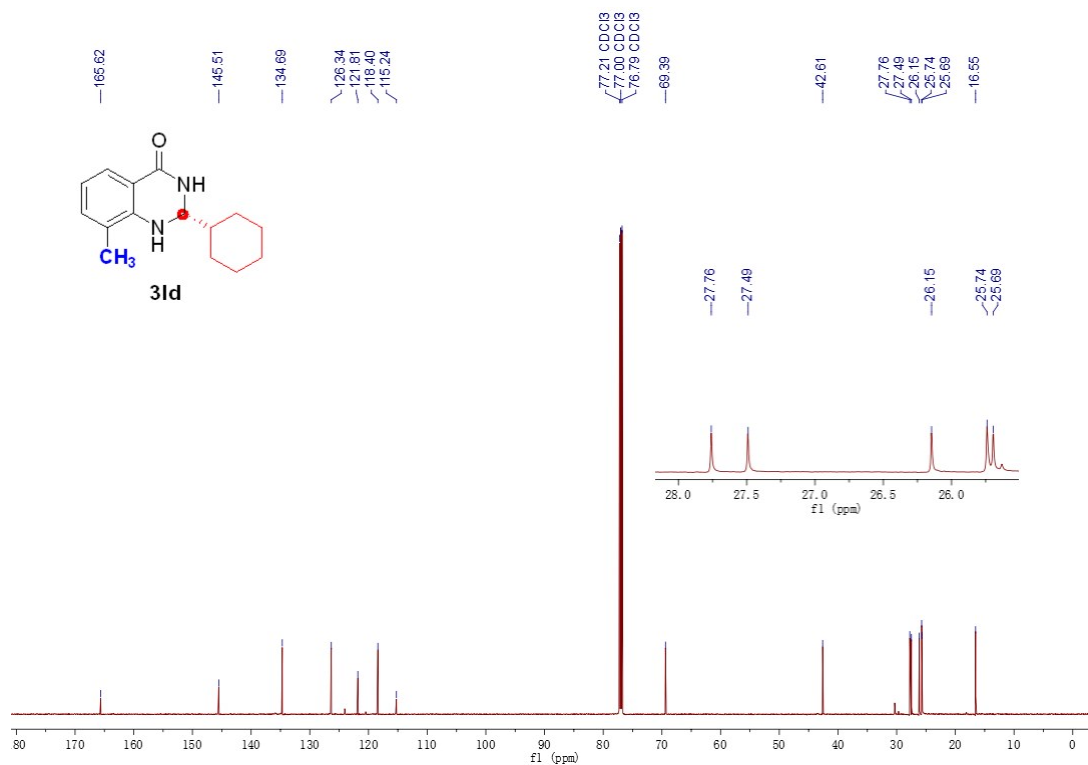

Fig.S 77 <sup>13</sup>C NMR of compound **31d**

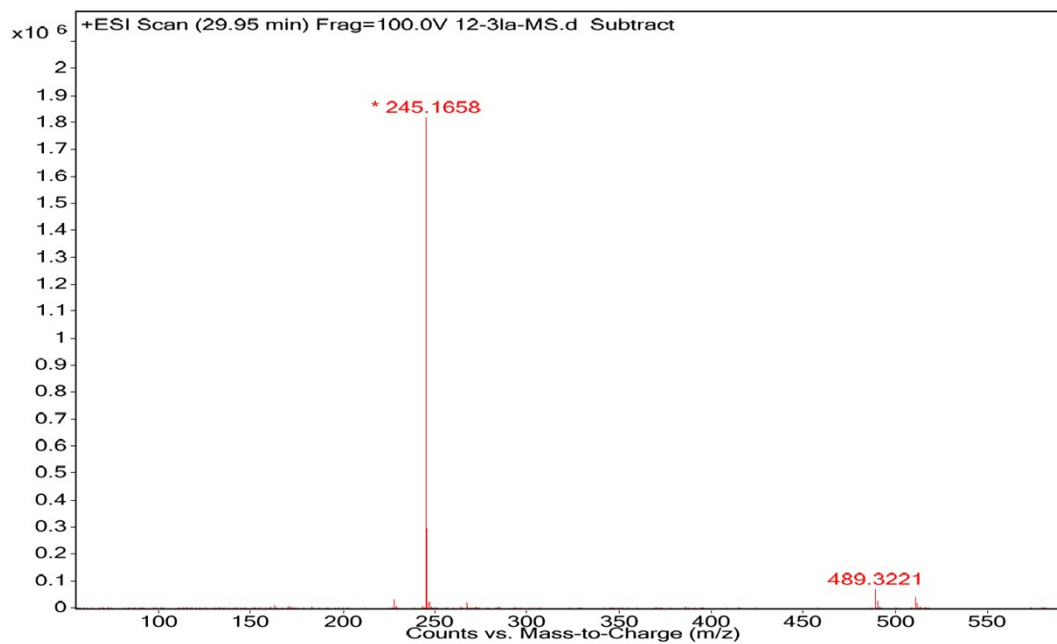

Fig.S 78 <sup>1</sup>H NMR of compound **31d**

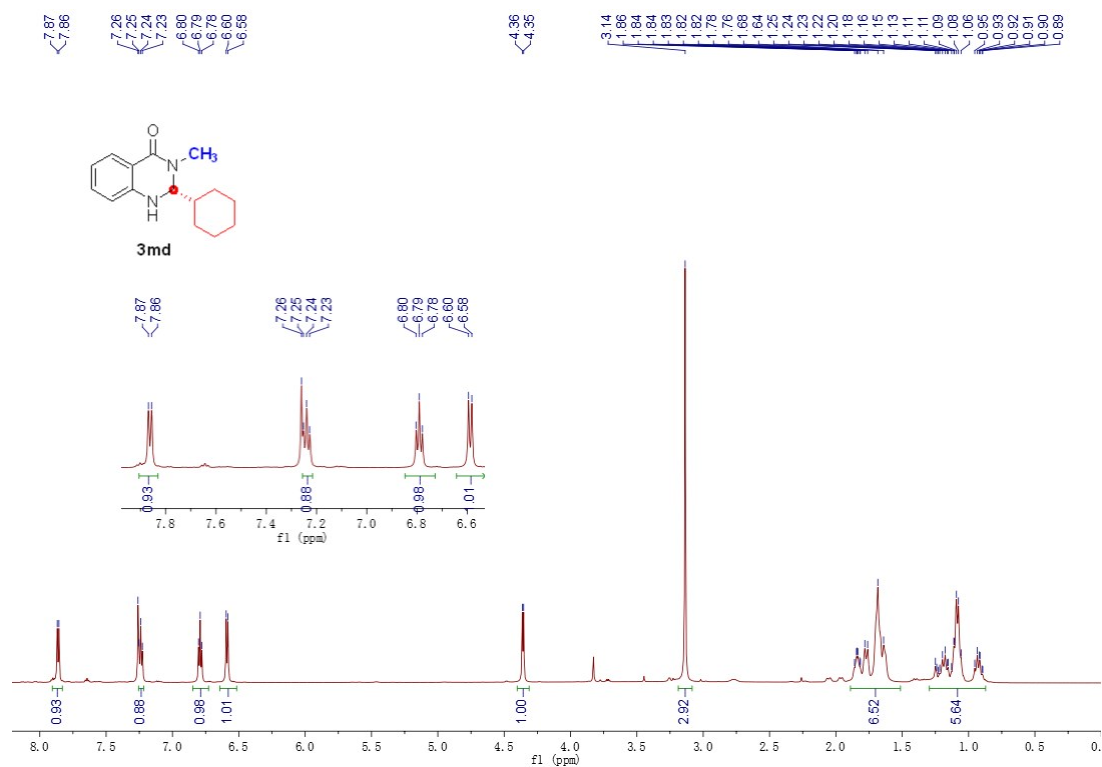

Fig.S 79 <sup>1</sup>H NMR of compound **3md**

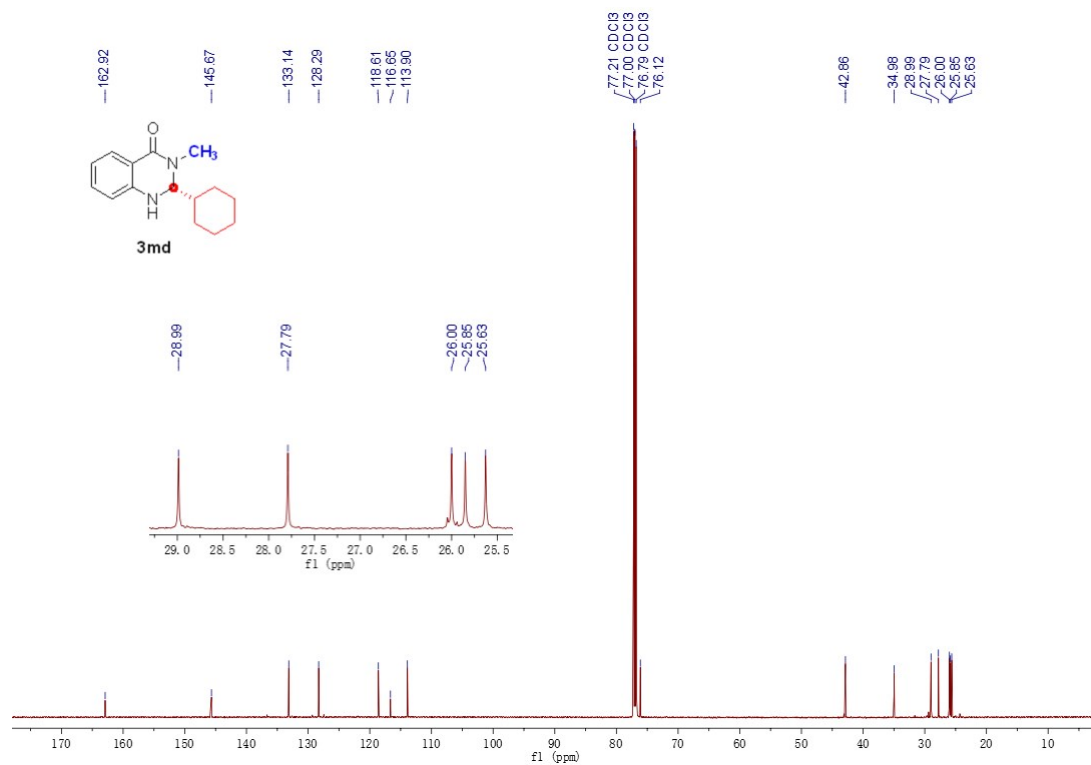

Fig.S 80 <sup>13</sup>C NMR of compound **3md**



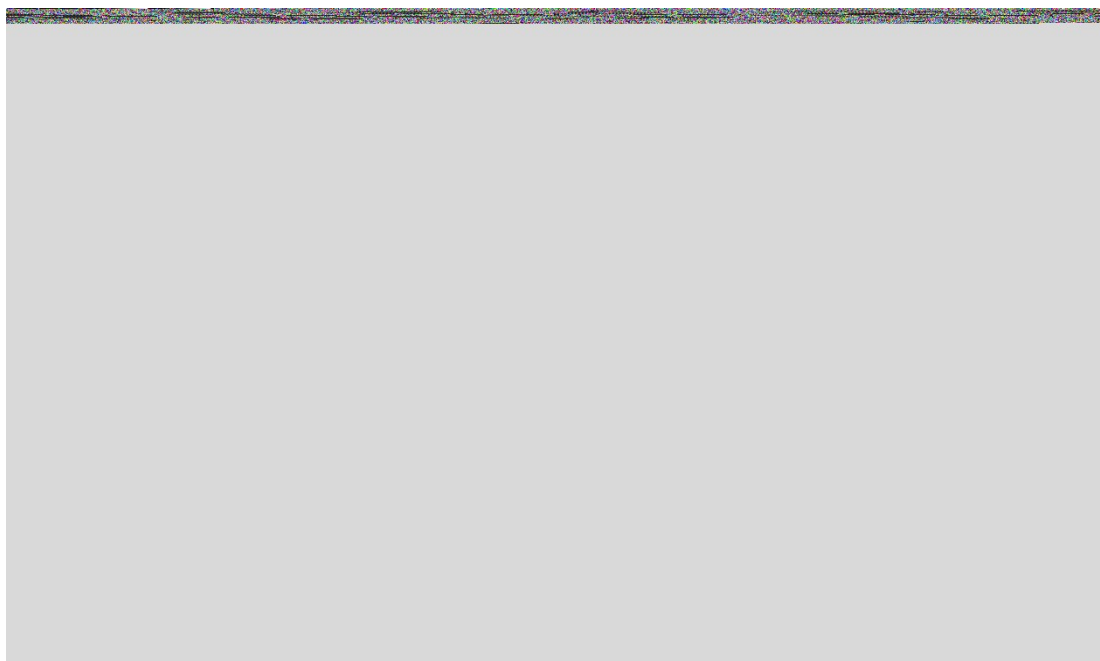

Fig.S 81 <sup>1</sup>H NMR of compound **3md**

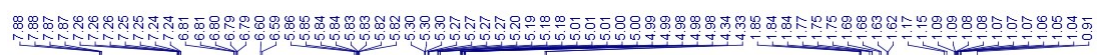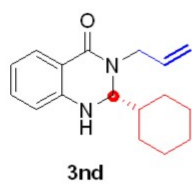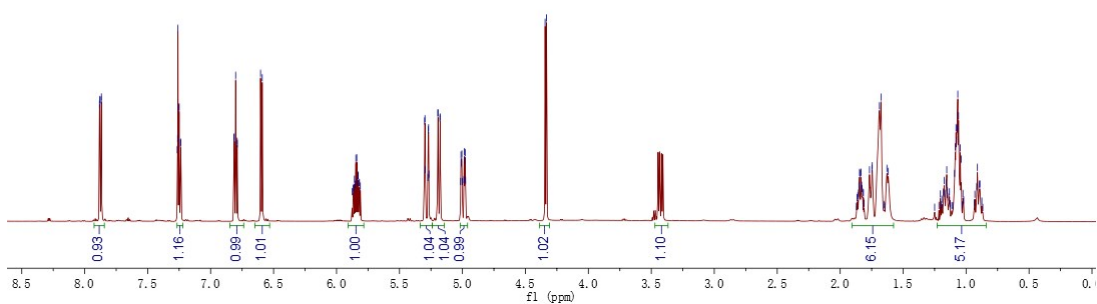

Fig.S 82 <sup>1</sup>H NMR of compound **3md**

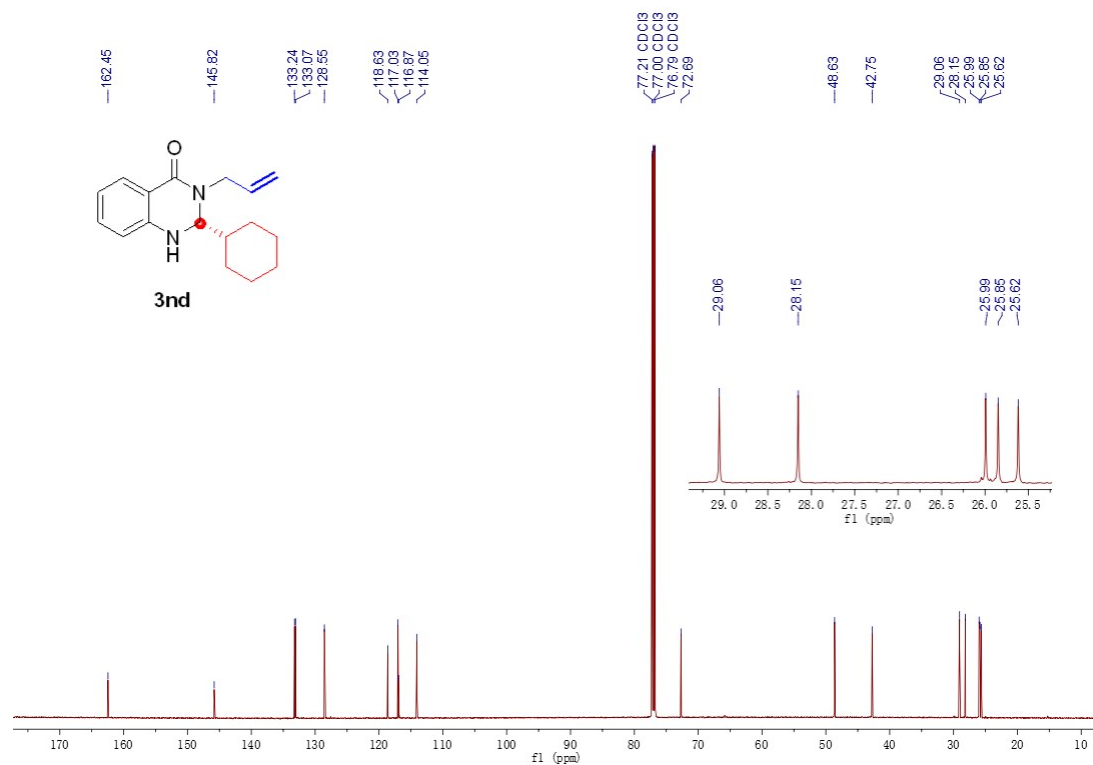

Fig.S 83 <sup>13</sup>C NMR of compound **3nd**

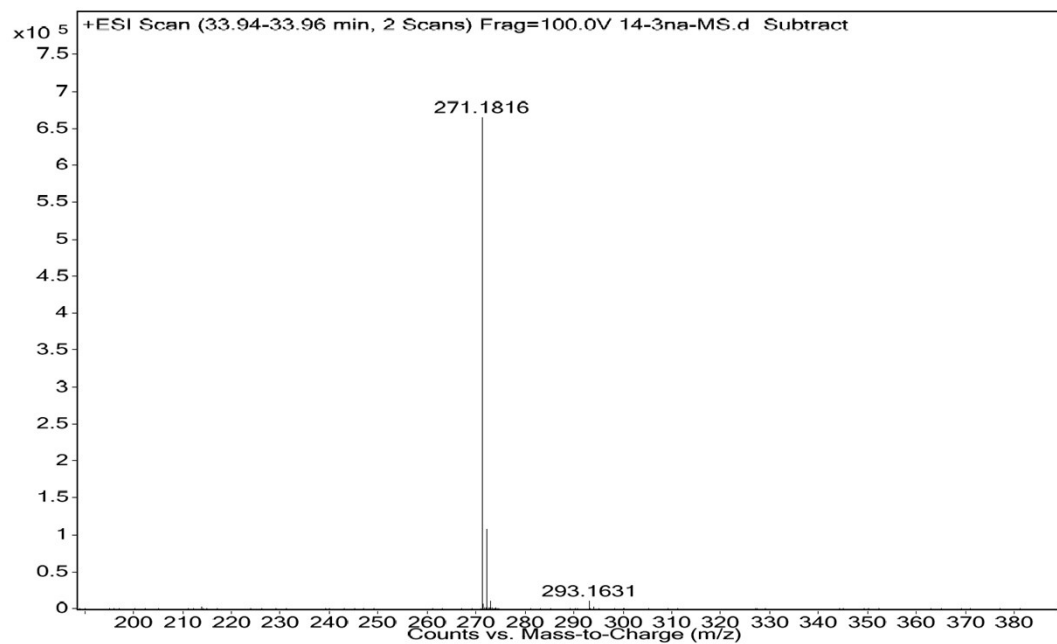

Fig.S 84 <sup>1</sup>H NMR of compound **3nd**



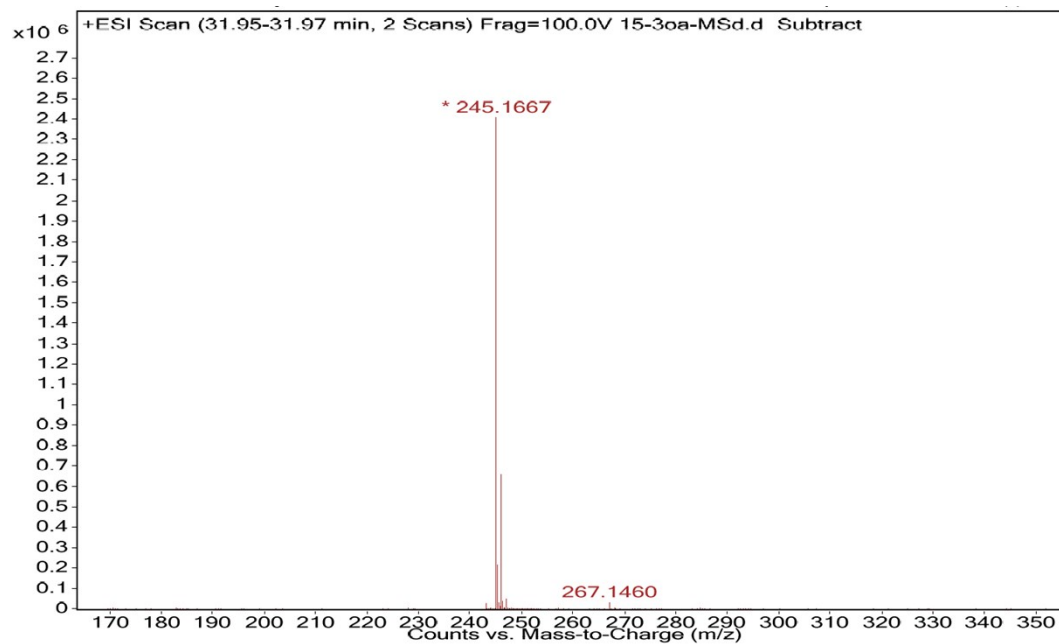

Fig.S 87 <sup>1</sup>H NMR of compound 30d

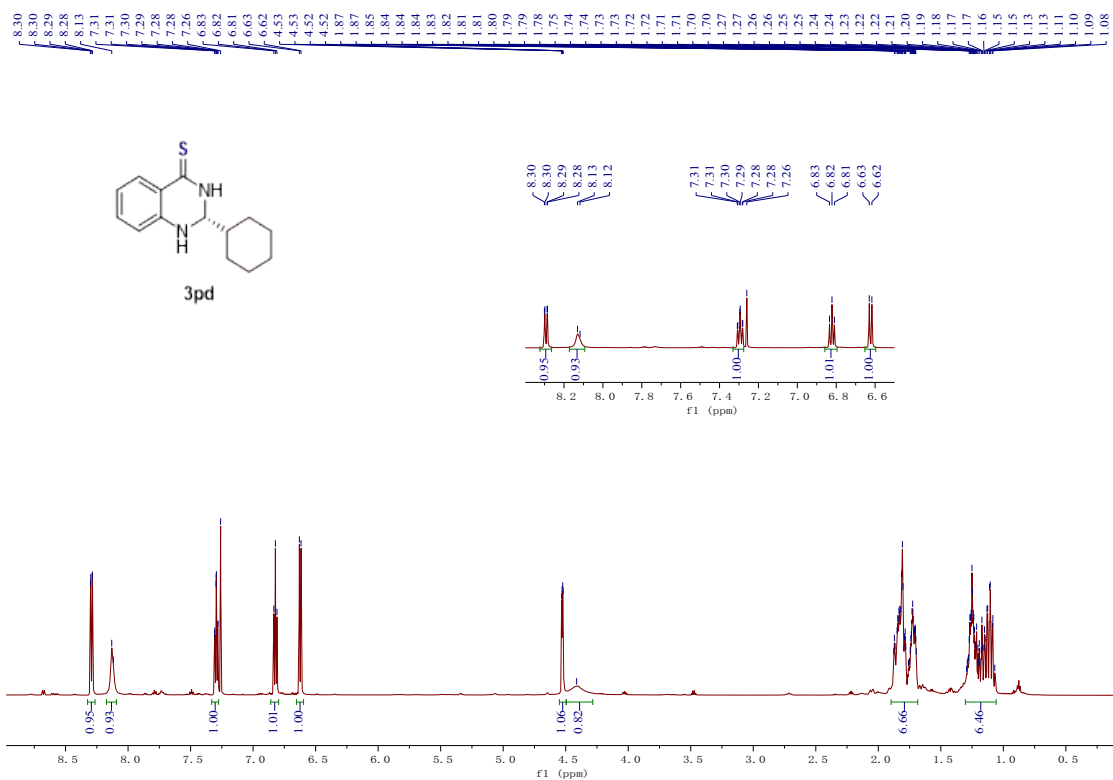

Fig.S 88 <sup>1</sup>H NMR of compound 3pd (Gram-scale)

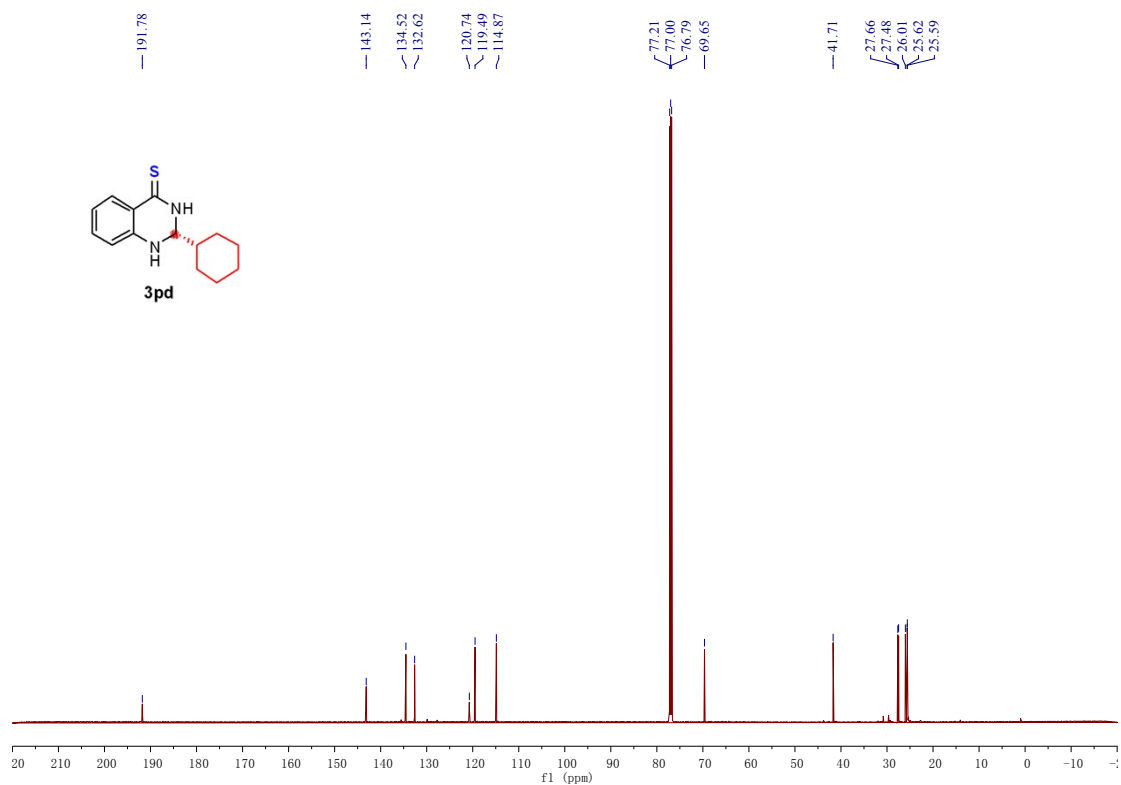

Fig.S 89 <sup>13</sup>C NMR of compound 3pd (Gram-scale)

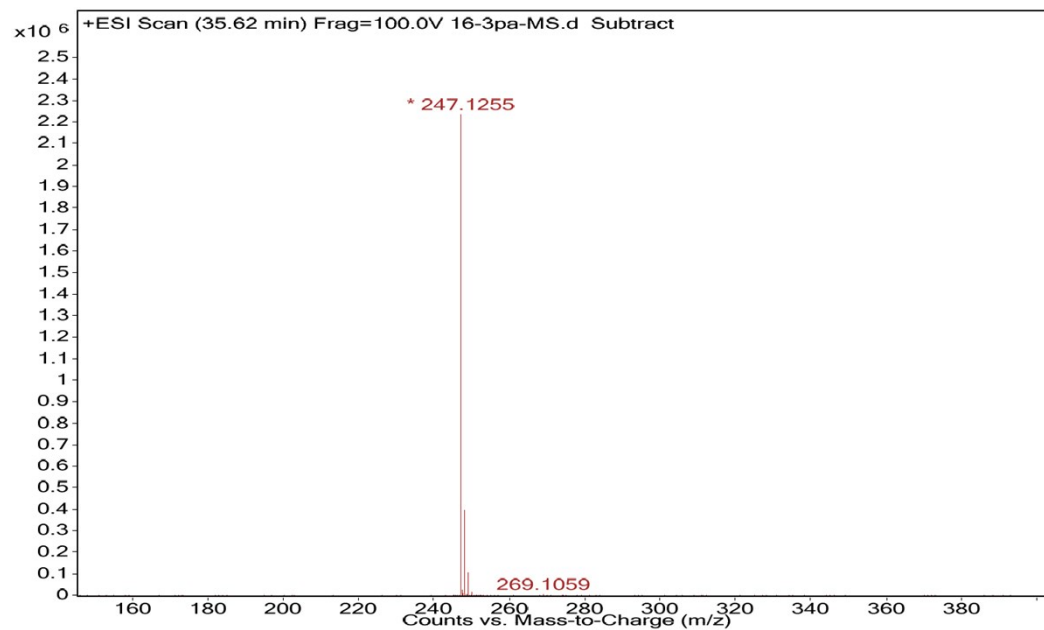

Fig.S 90 <sup>1</sup>H NMR of compound 3pd (Gram-scale)

#### 4. HPLC of 2,3-Dihydroquinazolinones **3**

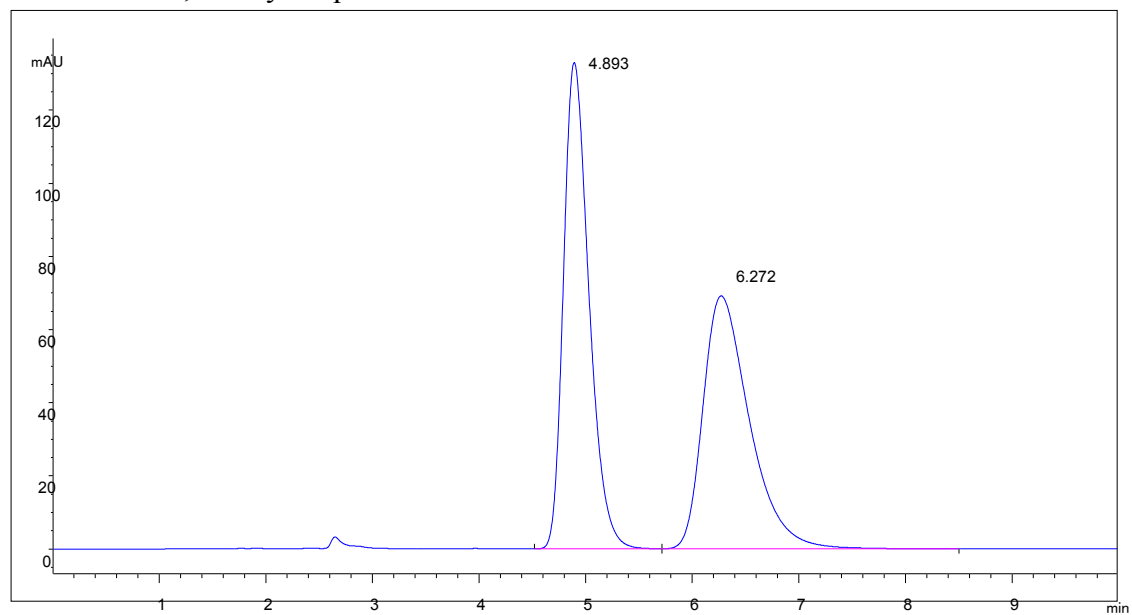

| # | Time (min) | Area (mAU*s) | Height (mAu) | Area % |
|---|------------|--------------|--------------|--------|
| 1 | 4.893      | 2201.5       | 132.9        | 51.265 |
| 2 | 6.272      | 2092.8       | 69.1         | 48.735 |

Fig.S 91 HPLC for racemic compound **3aa**

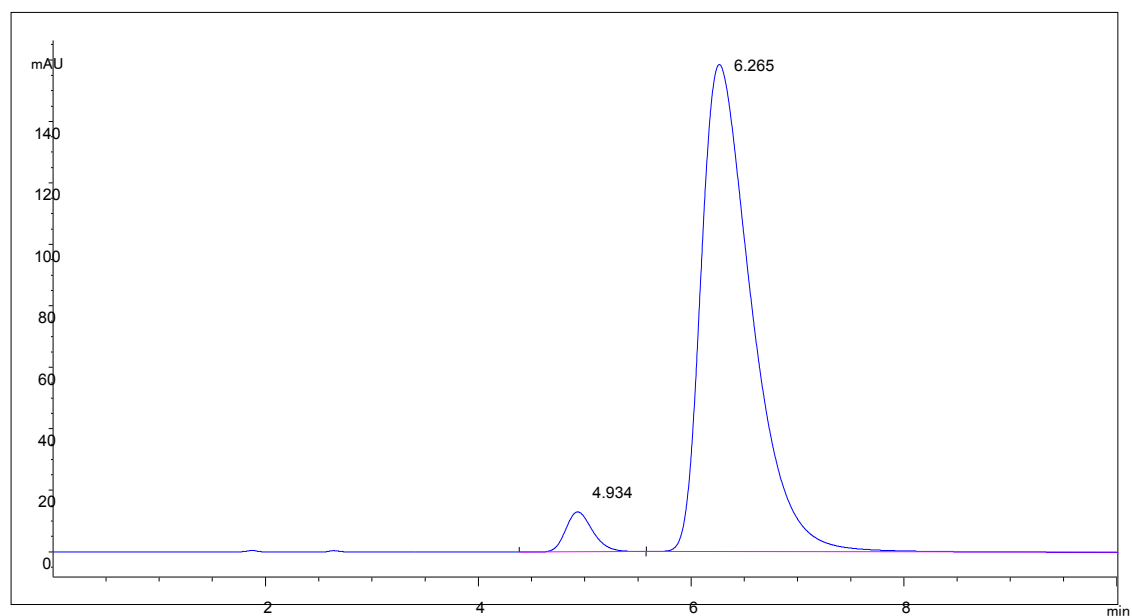

| # | Time (min) | Area (mAU*s) | Height (mAu) | Area % |
|---|------------|--------------|--------------|--------|
| 1 | 4.934      | 228.2        | 13           | 4.19   |
| 2 | 6.265      | 5218.8       | 158.5        | 95.810 |

Fig.S 92 HPLC for pure enantioenriched compound **3aa**

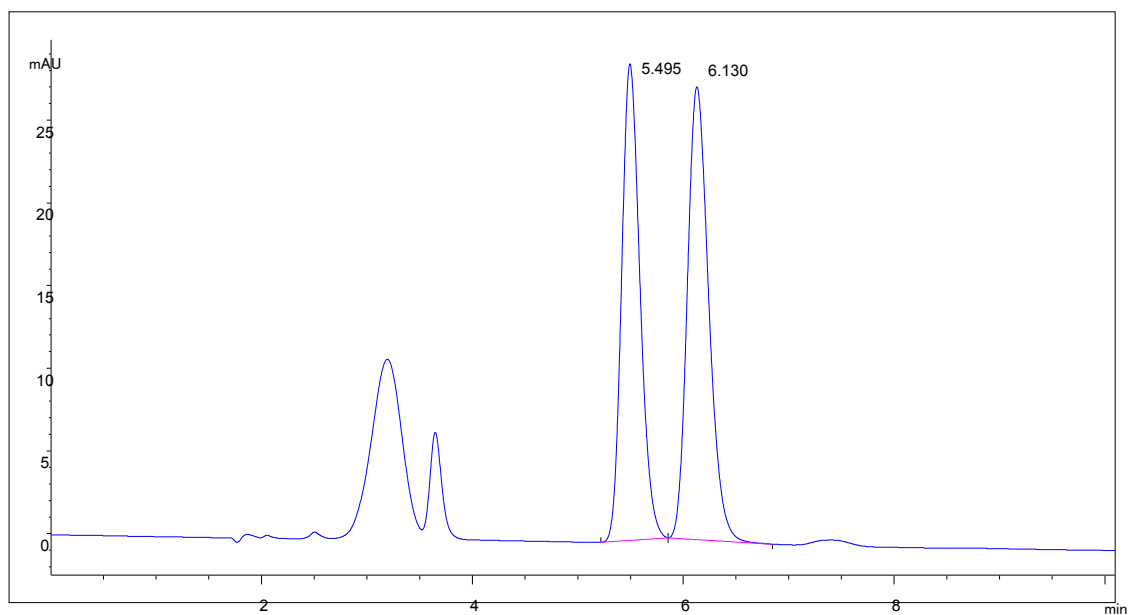

| # | Time (min) | Area (mAU*s) | Height (mAu) | Area % |
|---|------------|--------------|--------------|--------|
| 1 | 5.495      | 348.4        | 28.8         | 47.522 |
| 2 | 6.13       | 384.7        | 27.4         | 52.478 |

Fig.S 93 HPLC for racemic compound **3ab**

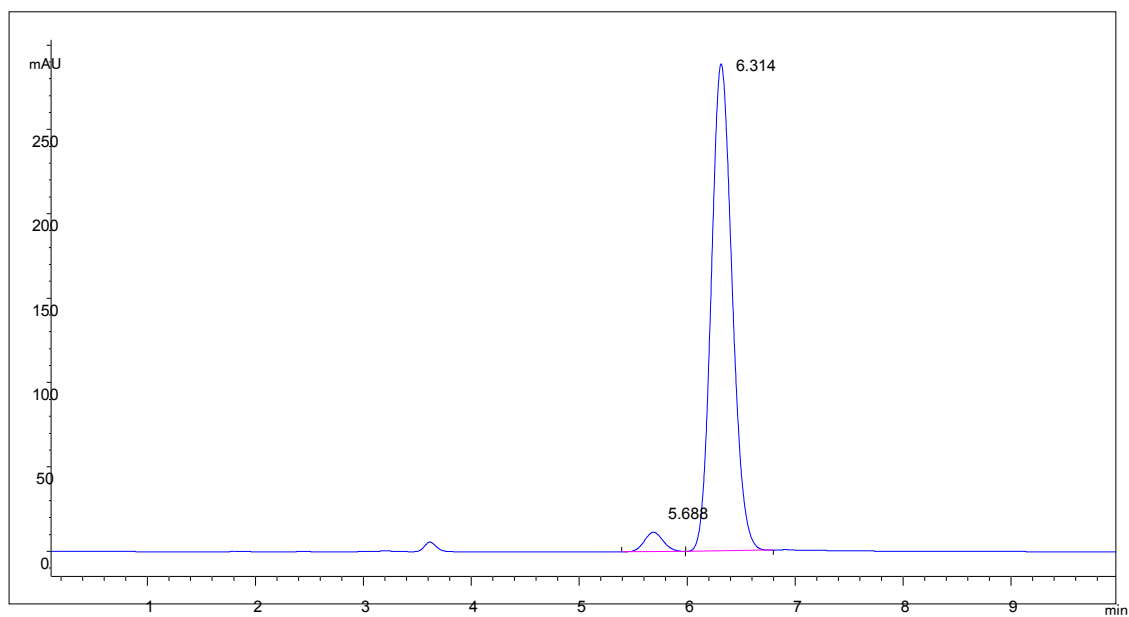

| # | Time (min) | Area (mAU*s) | Height (mAu) | Area % |
|---|------------|--------------|--------------|--------|
| 1 | 5.688      | 140          | 11.5         | 3.481  |
| 2 | 6.314      | 3883.3       | 288.5        | 96.519 |

Fig.S 94 HPLC for pure enantioenriched compound **3ab**

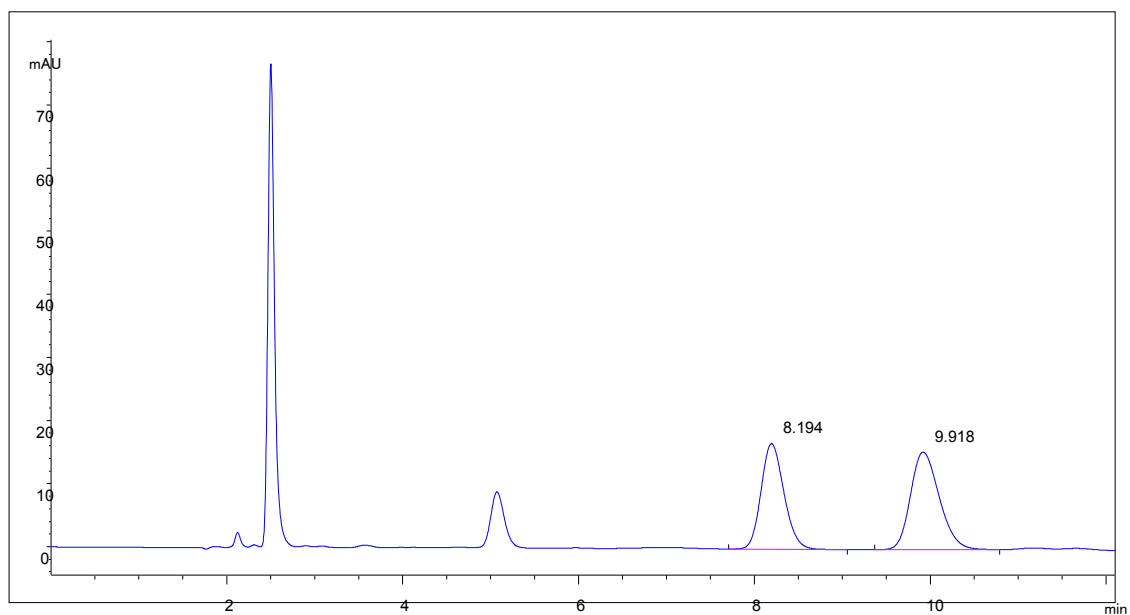

| # | Time (min) | Area (mAU*s) | Height (mAu) | Area % |
|---|------------|--------------|--------------|--------|
| 1 | 8.194      | 302.7        | 16.8         | 46.268 |
| 2 | 9.918      | 351.6        | 15.5         | 53.732 |

Fig.S 95 HPLC for racemic compound **3ac**

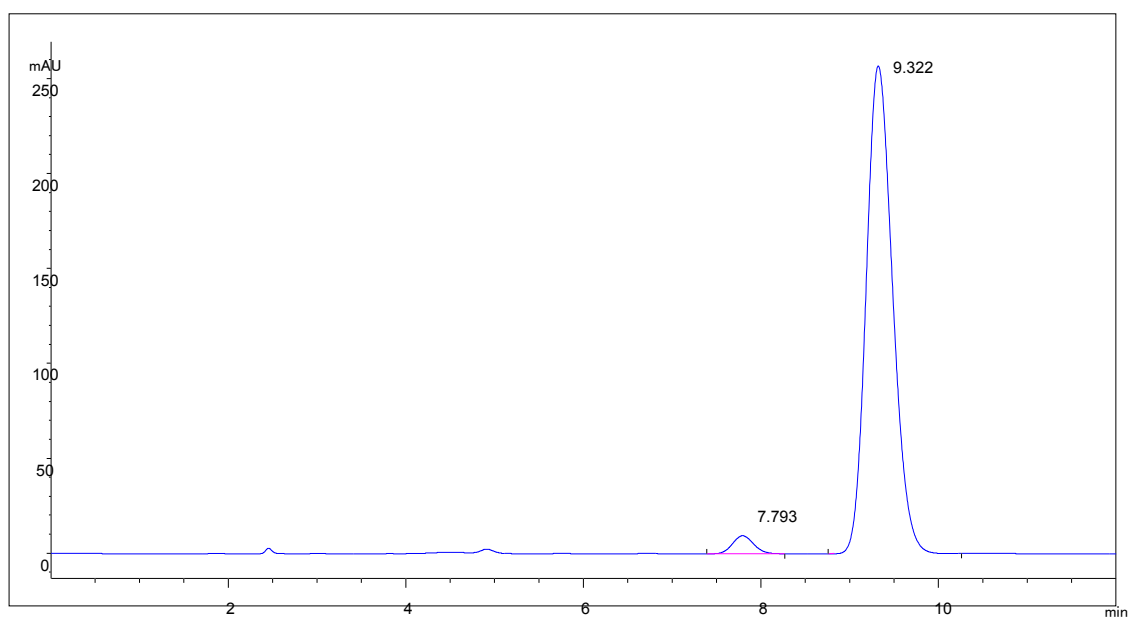

| # | Time (min) | Area (mAU*s) | Height (mAu) | Area % |
|---|------------|--------------|--------------|--------|
| 1 | 7.793      | 156          | 9.5          | 2.862  |
| 2 | 9.322      | 5293.4       | 256.9        | 97.138 |

Fig.S 96 HPLC for pure enantioenriched compound **3ac**



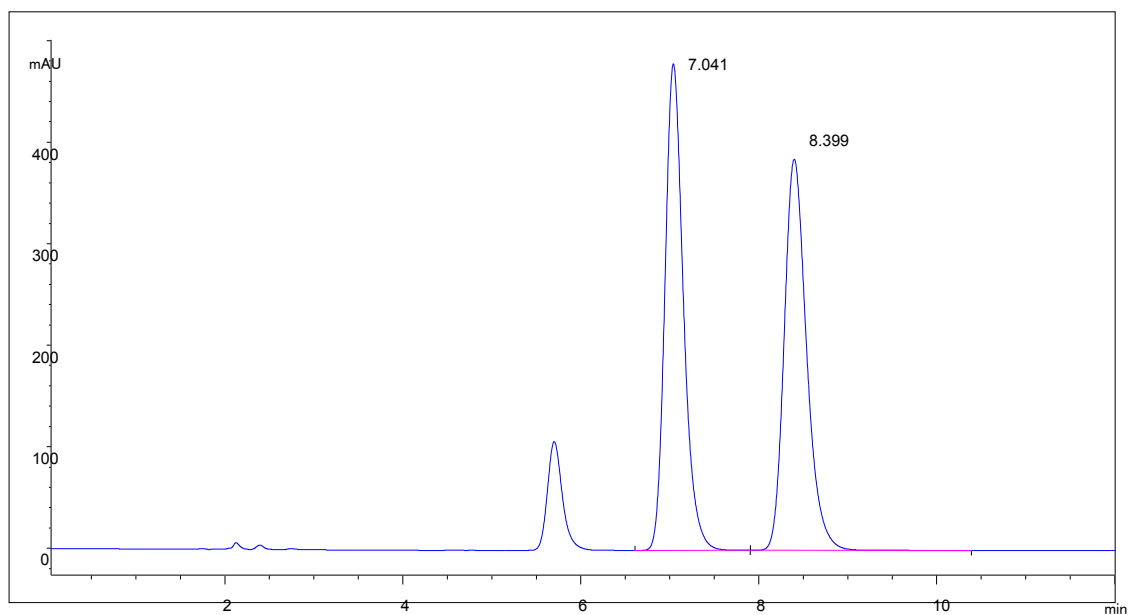

| # | Time (min) | Area (mAU*s) | Height (mAu) | Area % |
|---|------------|--------------|--------------|--------|
| 1 | 7.041      | 6897.2       | 479.2        | 50.648 |
| 2 | 8.399      | 6720.6       | 385.2        | 49.352 |

Fig.S 97 HPLC for racemic compound **3ad**

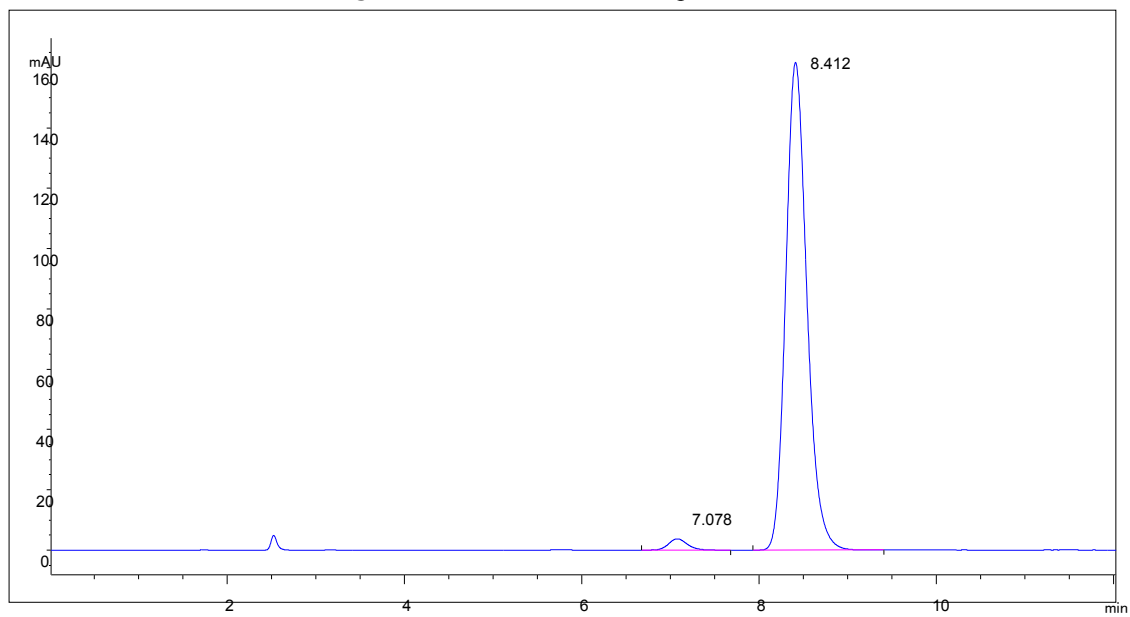

| # | Time (min) | Area (mAU*s) | Height (mAu) | Area % |
|---|------------|--------------|--------------|--------|
| 1 | 7.078      | 56.3         | 3.8          | 2.058  |
| 2 | 8.412      | 2680.4       | 161.7        | 97.942 |

Fig.S 98 HPLC for pure enantioenriched compound **3ad (Gram-scale)**

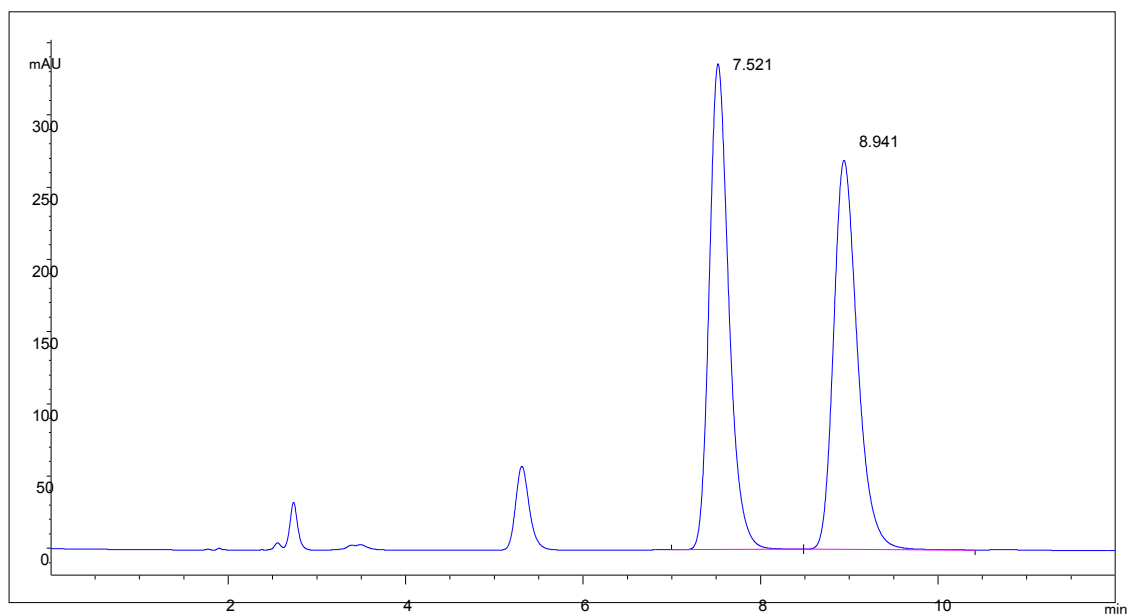

| # | Time (min) | Area (mAU*s) | Height (mAu) | Area % |
|---|------------|--------------|--------------|--------|
| 1 | 7.521      | 5147.8       | 336.3        | 50.575 |
| 2 | 8.941      | 5030.7       | 269.4        | 49.425 |

Fig.S 99 HPLC for racemic compound **3ae**

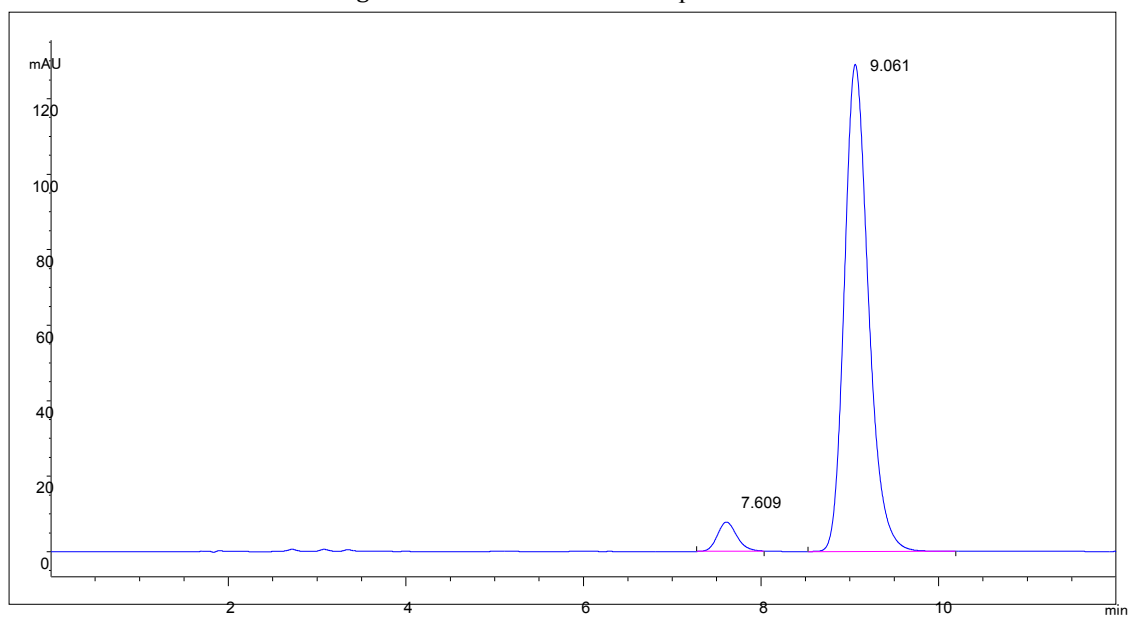

| # | Time (min) | Area (mAU*s) | Height (mAu) | Area % |
|---|------------|--------------|--------------|--------|
| 1 | 7.609      | 119.2        | 7.8          | 4.673  |
| 2 | 9.061      | 2431.7       | 129          | 95.327 |

Fig.S 100 HPLC for pure enantioenriched compound **3ae (Gram-scale)**

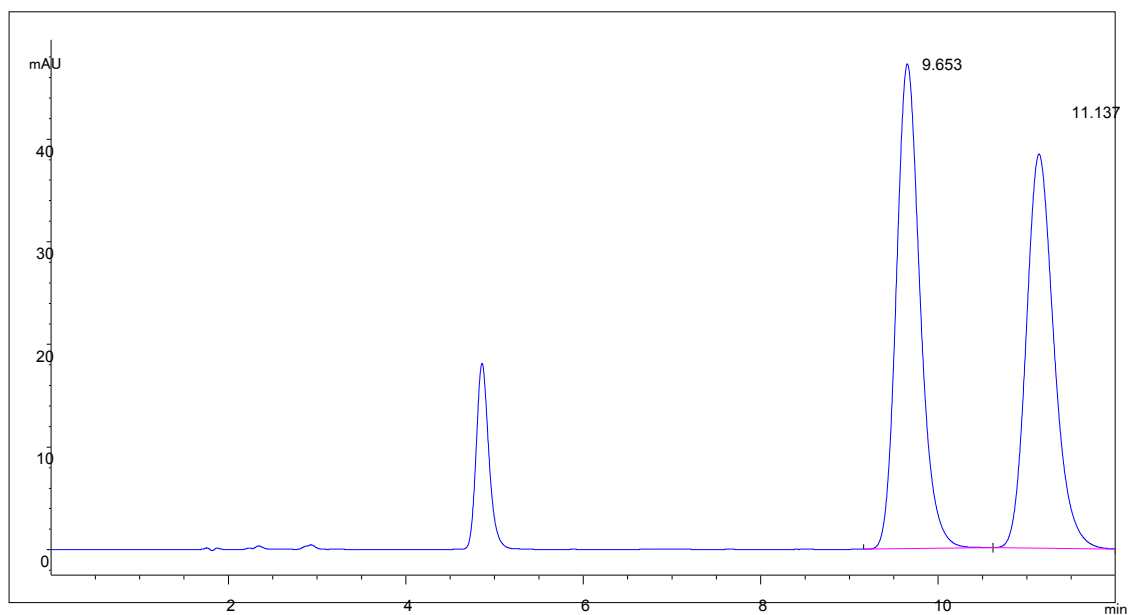

| # | Time (min) | Area (mAU*s) | Height (mAu) | Area % |
|---|------------|--------------|--------------|--------|
| 1 | 9.653      | 878.5        | 47.2         | 51.405 |
| 2 | 11.137     | 830.5        | 38.4         | 48.595 |

Fig.S 101 HPLC for racemic compound **3af**

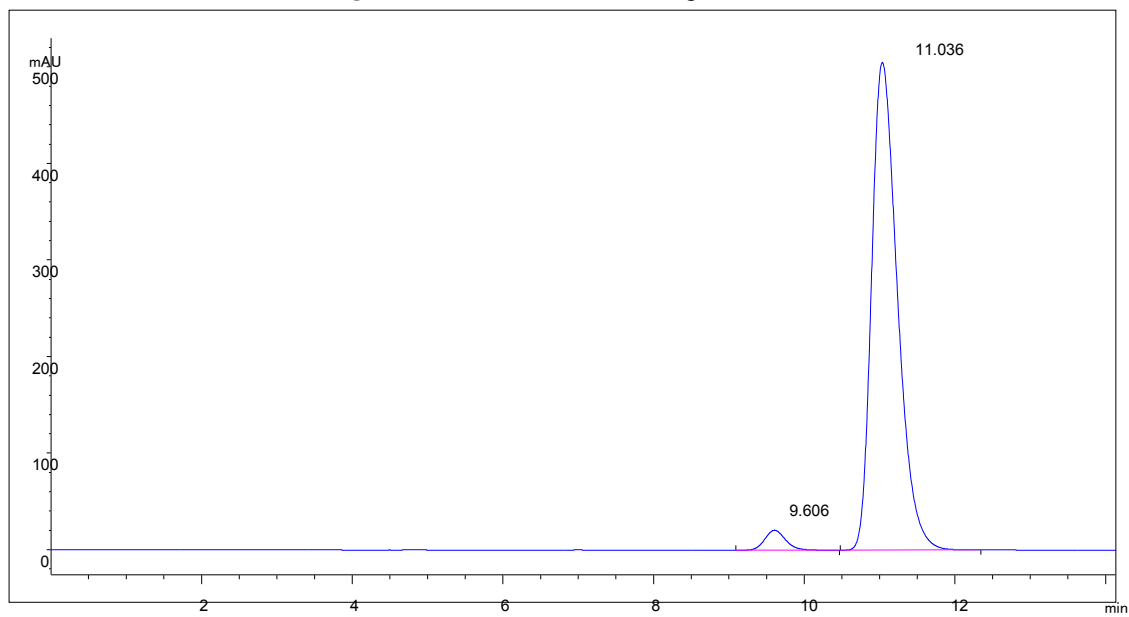

| # | Time (min) | Area (mAU*s) | Height (mAu) | Area % |
|---|------------|--------------|--------------|--------|
| 1 | 9.606      | 393.3        | 20.5         | 3.171  |
| 2 | 11.036     | 12010.6      | 505          | 96.829 |

Fig.S 102 HPLC for pure enantioenriched compound **3af**

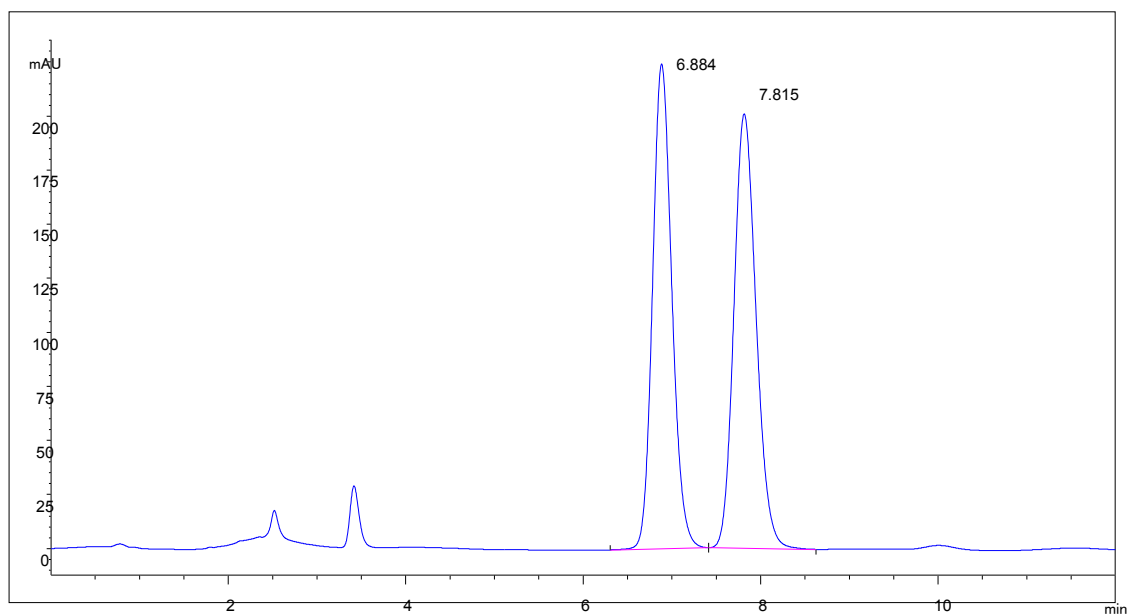

| # | Time (min) | Area (mAU*s) | Height (mAu) | Area % |
|---|------------|--------------|--------------|--------|
| 1 | 6.884      | 3376.1       | 224.3        | 49.188 |
| 2 | 7.815      | 3487.6       | 200.9        | 50.812 |

Fig.S 103 HPLC for racemic compound **3ag**

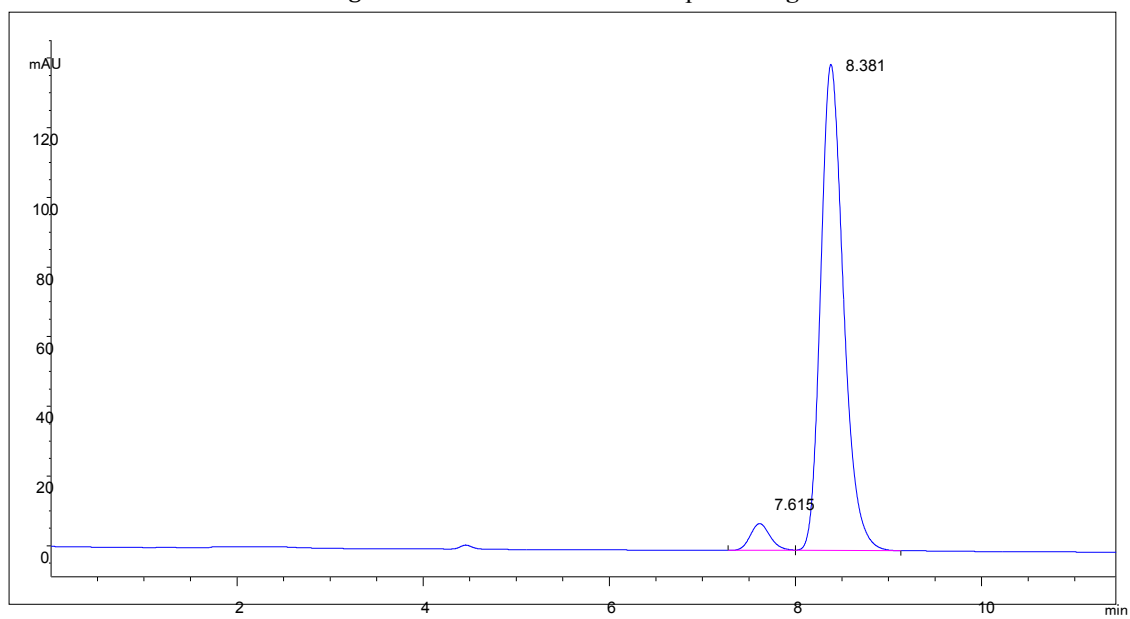

| # | Time (min) | Area (mAU*s) | Height (mAu) | Area % |
|---|------------|--------------|--------------|--------|
| 1 | 7.615      | 112.8        | 7.7          | 4.533  |
| 2 | 8.371      | 2376.4       | 139.6        | 95.467 |

Fig.S 104 HPLC for pure enantioenriched compound **3ag (Gram-scale)**

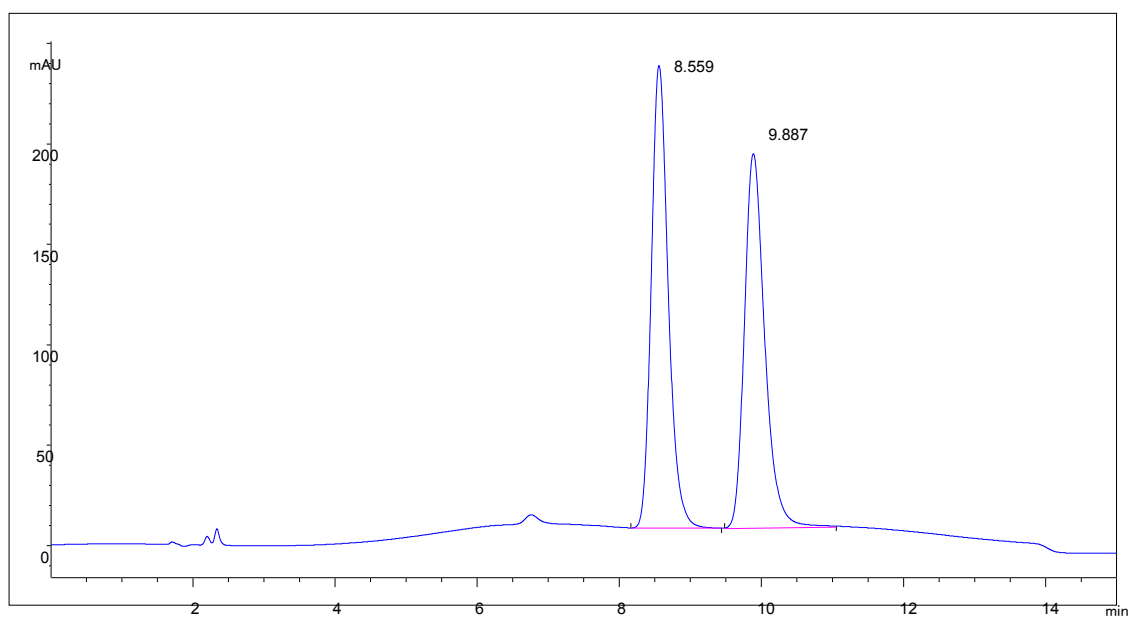

| # | Time (min) | Area (mAU*s) | Height (mAu) | Area % |
|---|------------|--------------|--------------|--------|
| 1 | 8.559      | 3823.2       | 230.2        | 50.743 |
| 2 | 9.887      | 3711.2       | 186.5        | 49.257 |

Fig.S 105 HPLC for racemic compound **3ah**

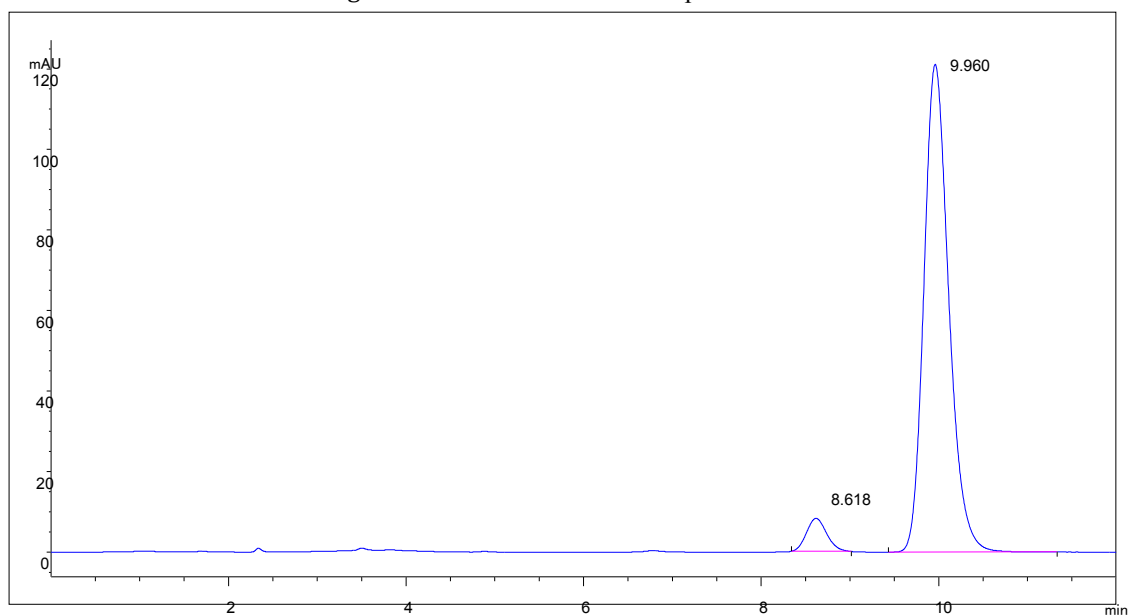

| # | Time (min) | Area (mAU*s) | Height (mAu) | Area % |
|---|------------|--------------|--------------|--------|
| 1 | 8.618      | 130.2        | 8.2          | 5.241  |
| 2 | 9.96       | 2354.4       | 121.1        | 94.759 |

Fig.S 106 HPLC for pure enantioenriched compound **3ah**

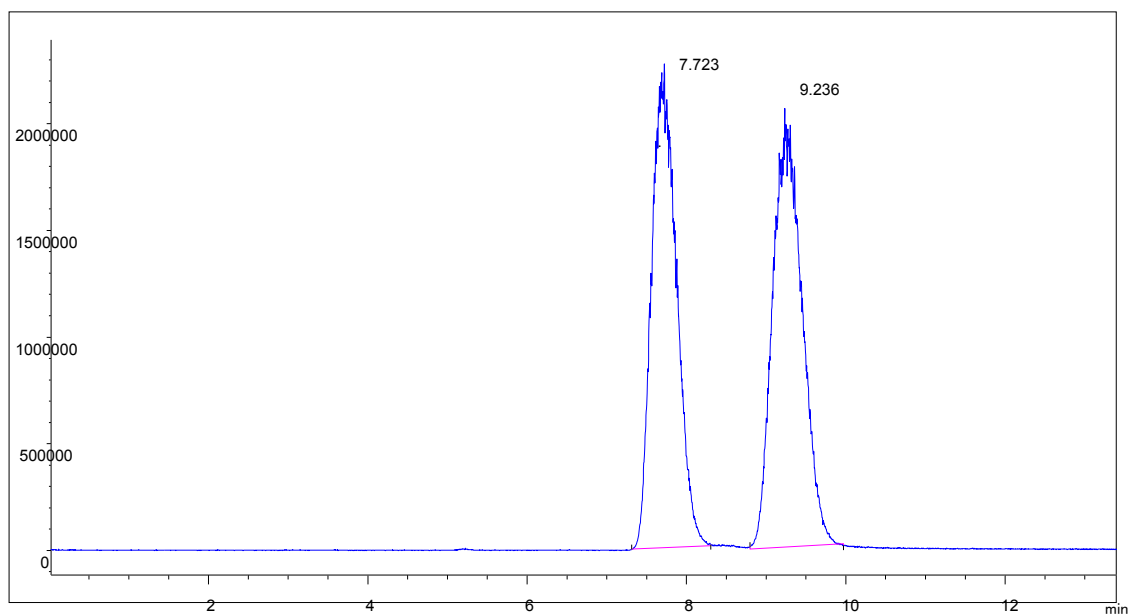

| # | Time (min) | Area (mAU*s) | Height (mAu) | Area % |
|---|------------|--------------|--------------|--------|
| 1 | 7.723      | 4862         | 227          | 48.642 |
| 2 | 9.236      | 5133         | 206          | 51.358 |

Fig.S 107 HPLC for racemic compound **3ai**

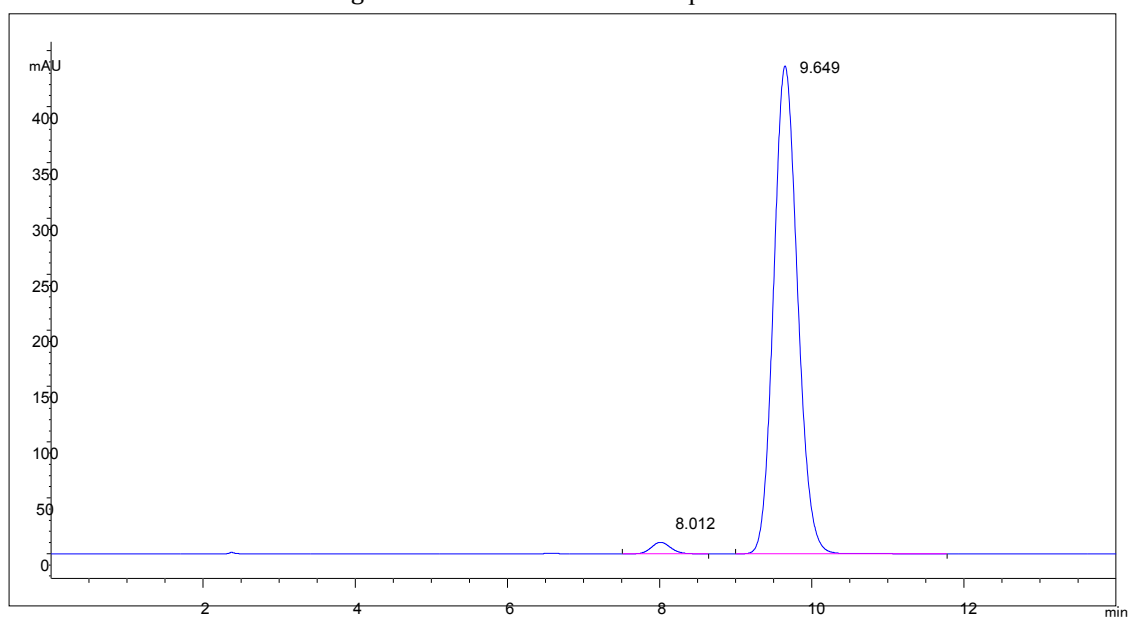

| # | Time (min) | Area (mAU*s) | Height (mAu) | Area % |
|---|------------|--------------|--------------|--------|
| 1 | 8.012      | 180.8        | 10.2         | 1.865  |
| 2 | 9.649      | 9511.2       | 436.4        | 98.135 |

Fig.S 108 HPLC for pure enantioenriched compound **3ai (Gram-scale)**

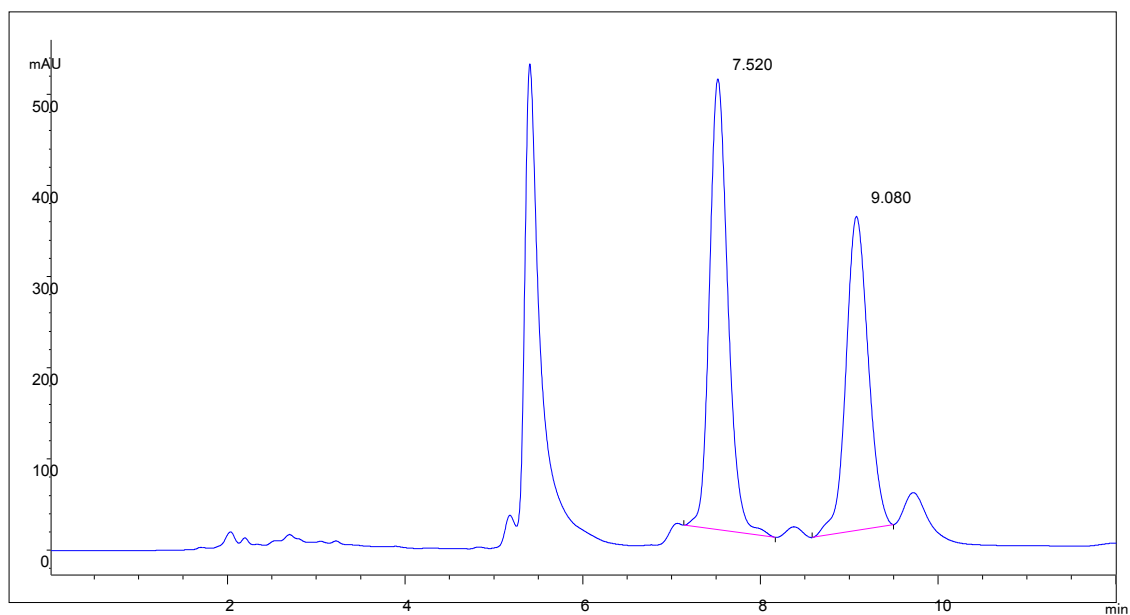

| # | Time (min) | Area (mAU*s) | Height (mAu) | Area % |
|---|------------|--------------|--------------|--------|
| 1 | 7.52       | 7142.8       | 494.4        | 54.334 |
| 2 | 9.08       | 6003.2       | 344.3        | 45.666 |

Fig.S 109 HPLC for racemic compound **3aj**

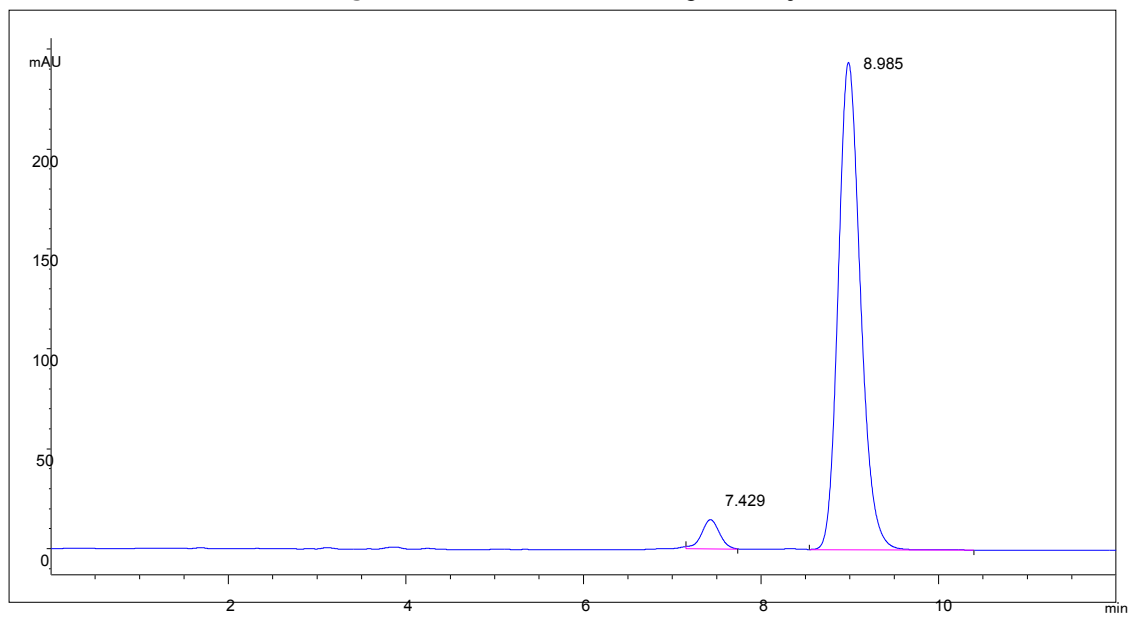

| # | Time (min) | Area (mAU*s) | Height (mAu) | Area % |
|---|------------|--------------|--------------|--------|
| 1 | 7.429      | 208.2        | 14.7         | 4.695  |
| 2 | 8.985      | 4227.6       | 243.8        | 95.305 |

Fig.S 110 HPLC for pure enantioenriched compound **3aj**

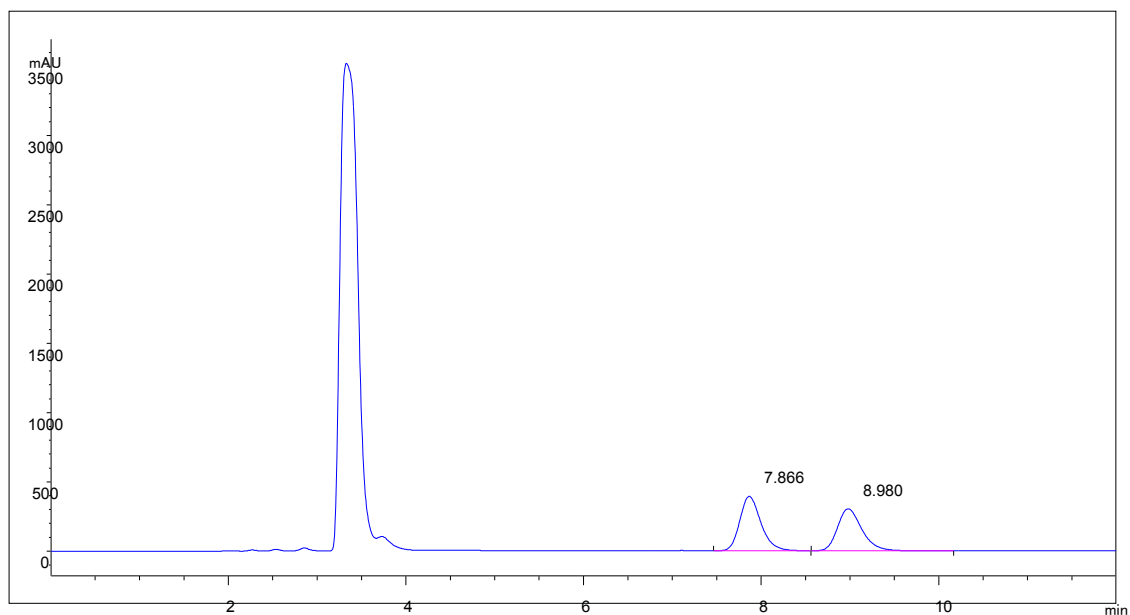

| # | Time (min) | Area (mAU*s) | Height (mAu) | Area % |
|---|------------|--------------|--------------|--------|
| 1 | 7.866      | 6493.3       | 392.9        | 53.059 |
| 2 | 8.98       | 5744.5       | 303          | 46.941 |

Fig.S 111 HPLC for racemic compound **3ak**

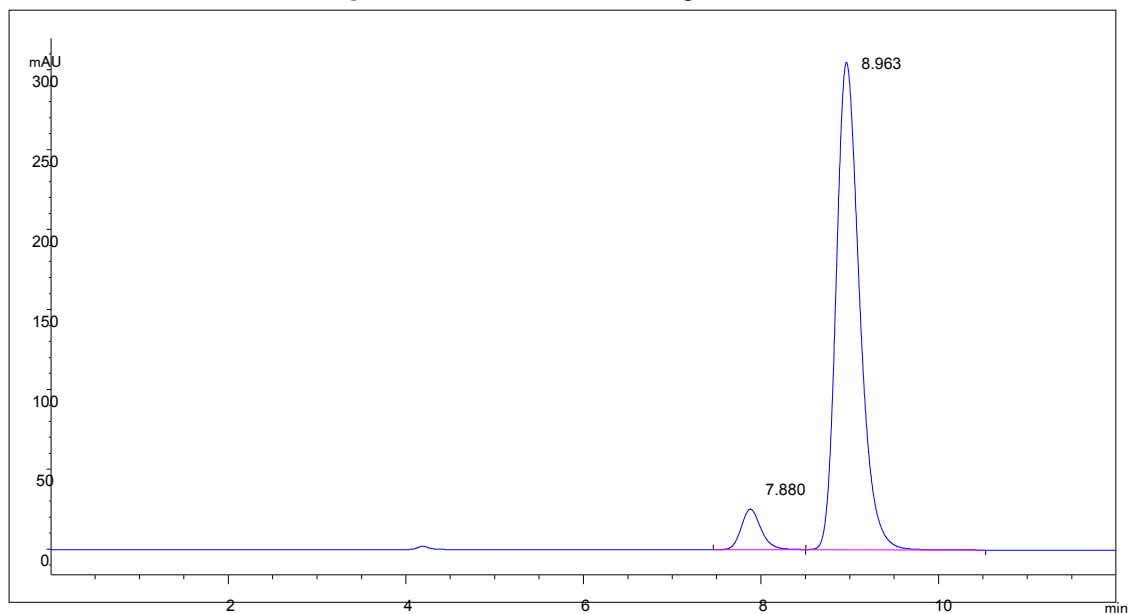

| # | Time (min) | Area (mAU*s) | Height (mAu) | Area % |
|---|------------|--------------|--------------|--------|
| 1 | 7.88       | 381.5        | 25.3         | 6.582  |
| 2 | 8.963      | 5556.1       | 304.9        | 93.418 |

Fig.S 112 HPLC for pure enantioenriched compound **3ak (Gram-scale)**



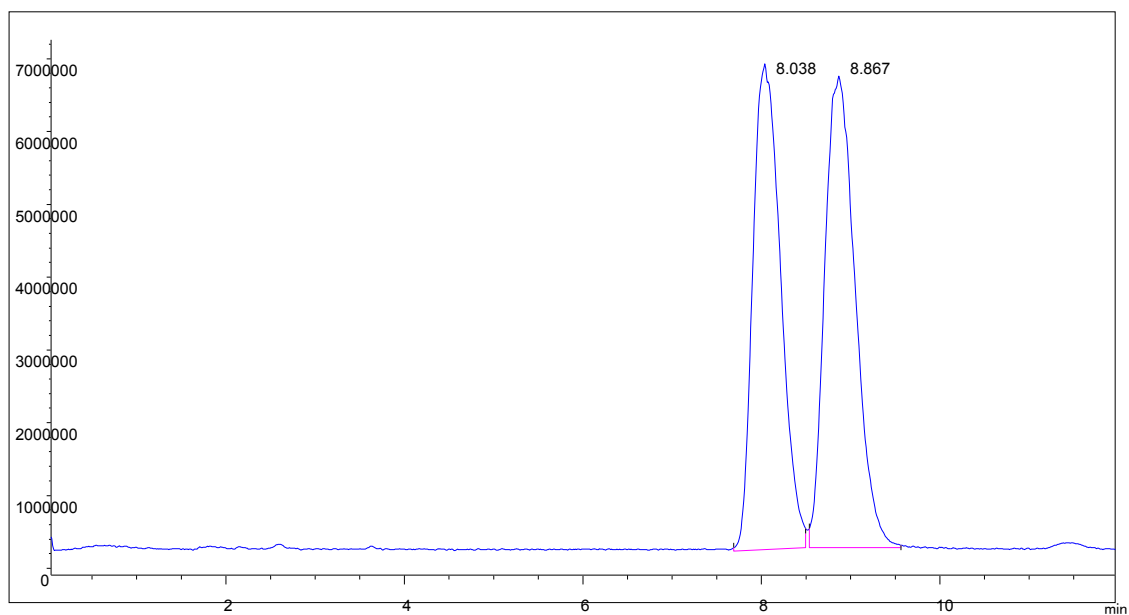

| # | Time (min) | Area (mAU*s) | Height (mAu) | Area % |
|---|------------|--------------|--------------|--------|
| 1 | 8.038      | 1444.1       | 667.8        | 48.466 |
| 2 | 8.867      | 1535.6       | 648.3        | 51.534 |

Fig.S 113 HPLC for racemic compound **3al**

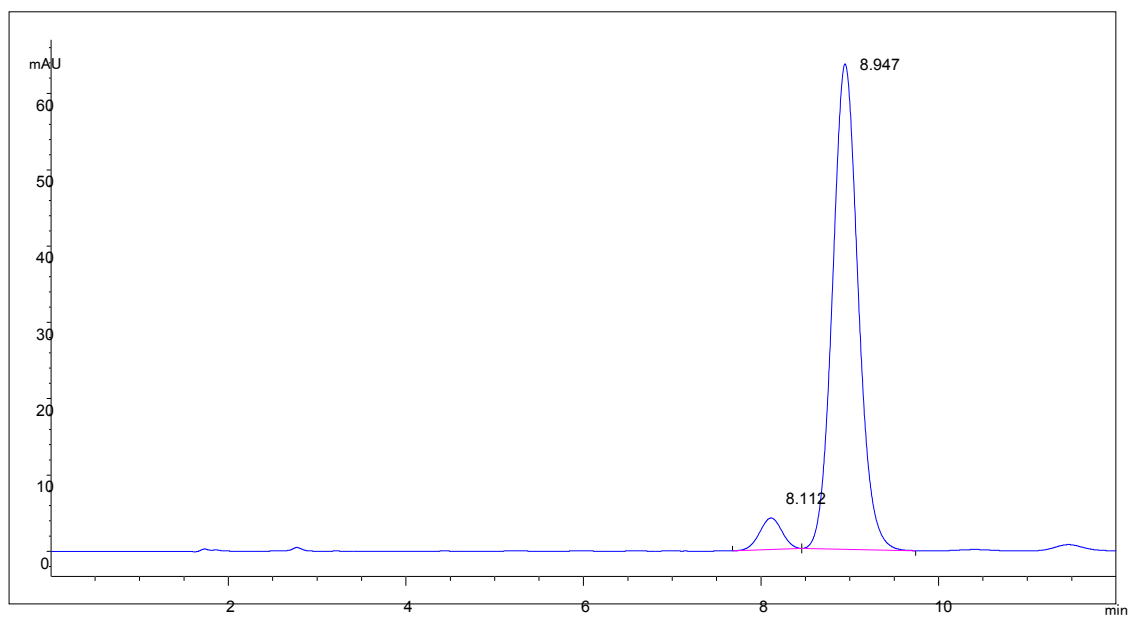

| # | Time (min) | Area (mAU*s) | Height (mAu) | Area % |
|---|------------|--------------|--------------|--------|
| 1 | 8.112      | 72.2         | 4.1          | 5.353  |
| 2 | 8.947      | 1276.7       | 63.6         | 94.647 |

Fig.S 114 HPLC for pure enantioenriched compound **3al**

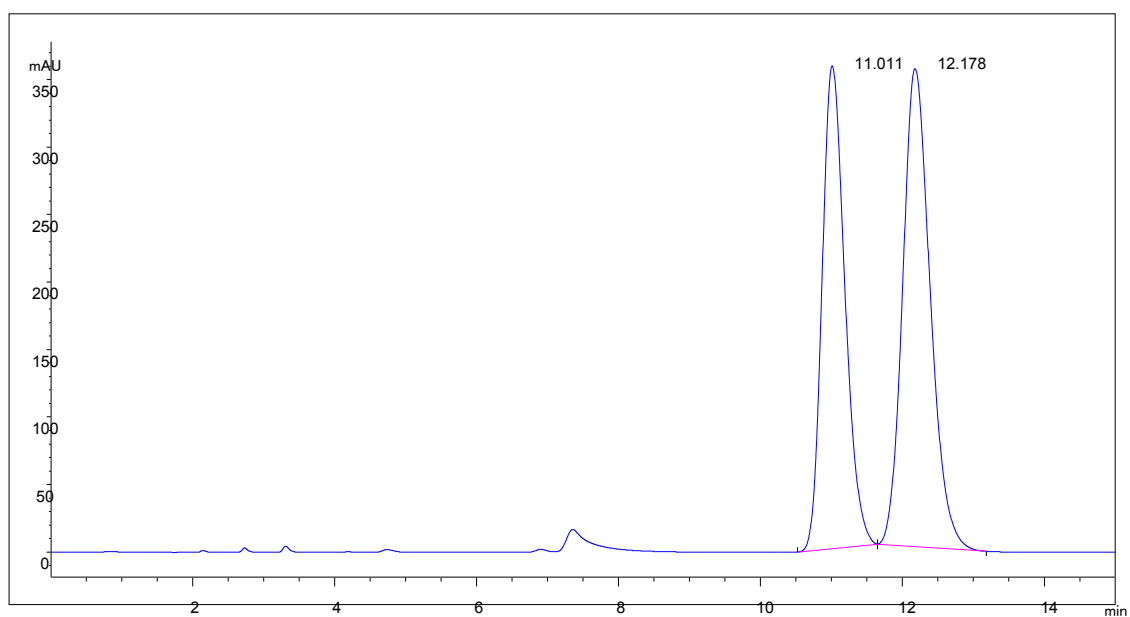

| # | Time (min) | Area (mAU*s) | Height (mAu) | Area % |
|---|------------|--------------|--------------|--------|
| 1 | 11.011     | 7982.8       | 357.7        | 45.541 |
| 2 | 12.178     | 9546.2       | 354.1        | 54.459 |

Fig.S 115 HPLC for racemic compound **3am**

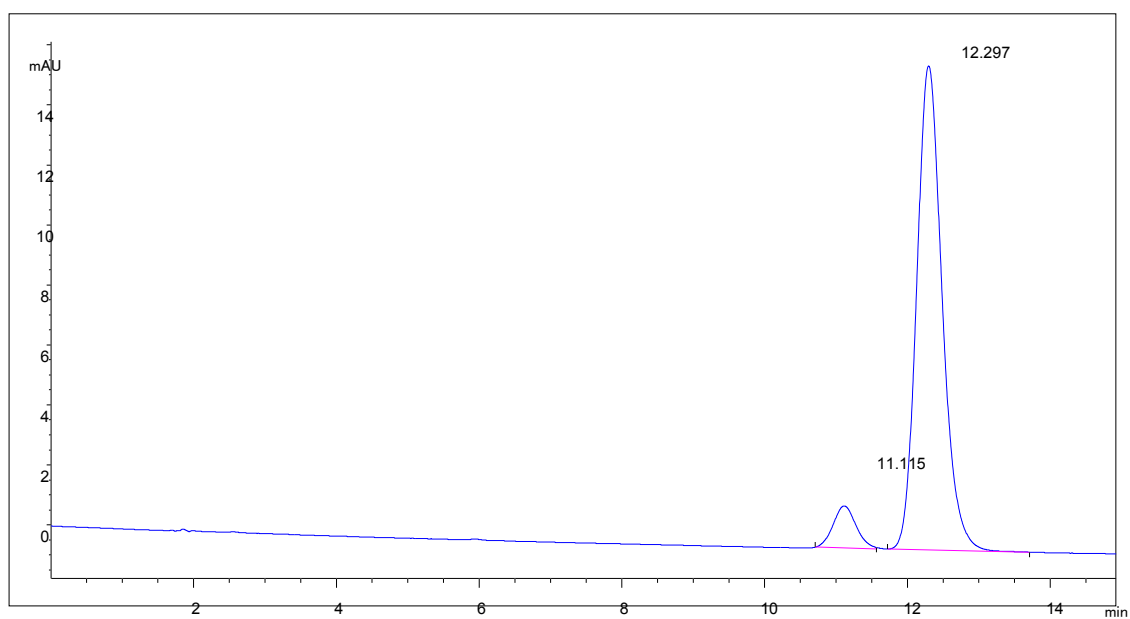

| # | Time (min) | Area (mAU*s) | Height (mAu) | Area % |
|---|------------|--------------|--------------|--------|
| 1 | 11.115     | 31.1         | 1.4          | 7.222  |
| 2 | 12.297     | 399          | 16.1         | 92.778 |

Fig.S 116 HPLC for pure enantioenriched compound **3am**

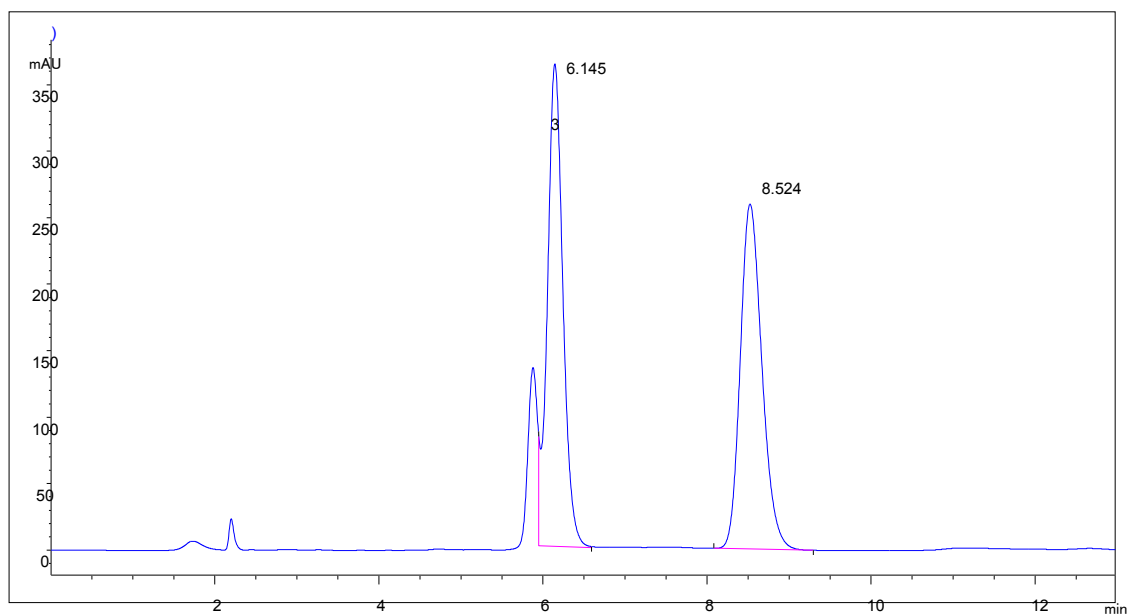

| # | Time (min) | Area (mAU*s) | Height (mAu) | Area % |
|---|------------|--------------|--------------|--------|
| 1 | 6.145      | 4775         | 362.8        | 50.115 |
| 2 | 8.524      | 4753.1       | 259.4        | 49.885 |

Fig.S 117 HPLC for racemic compound **3an**

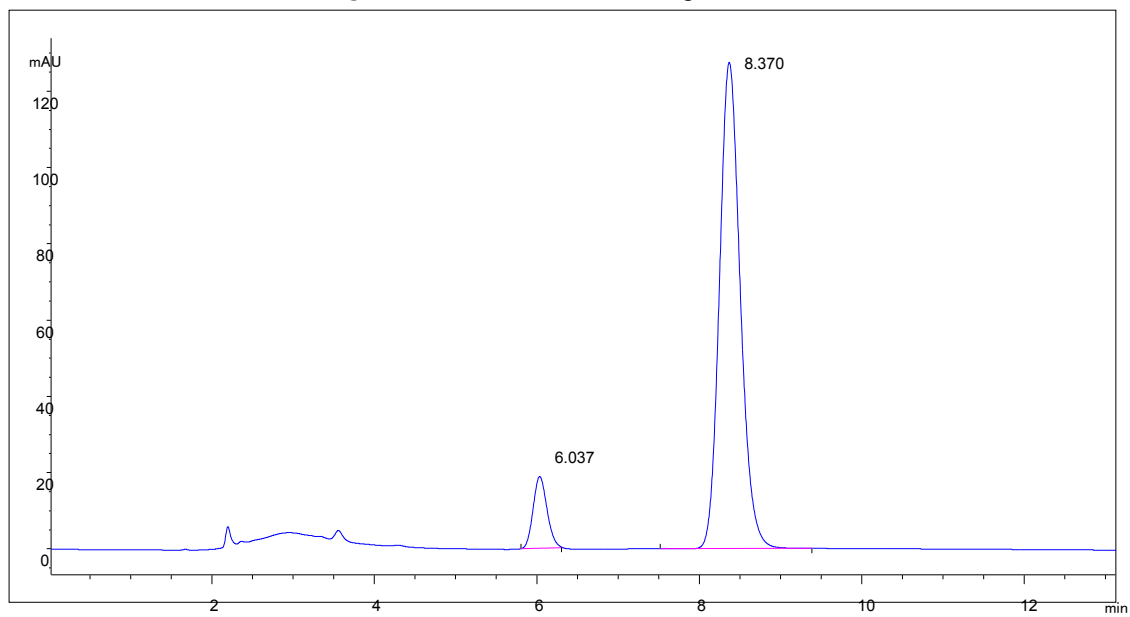

| # | Time (min) | Area (mAU*s) | Height (mAu) | Area % |
|---|------------|--------------|--------------|--------|
| 1 | 6.037      | 222.6        | 18.8         | 8.939  |
| 2 | 8.37       | 2268         | 127.5        | 91.061 |

Fig.S 118 HPLC for pure enantioenriched compound **3an**

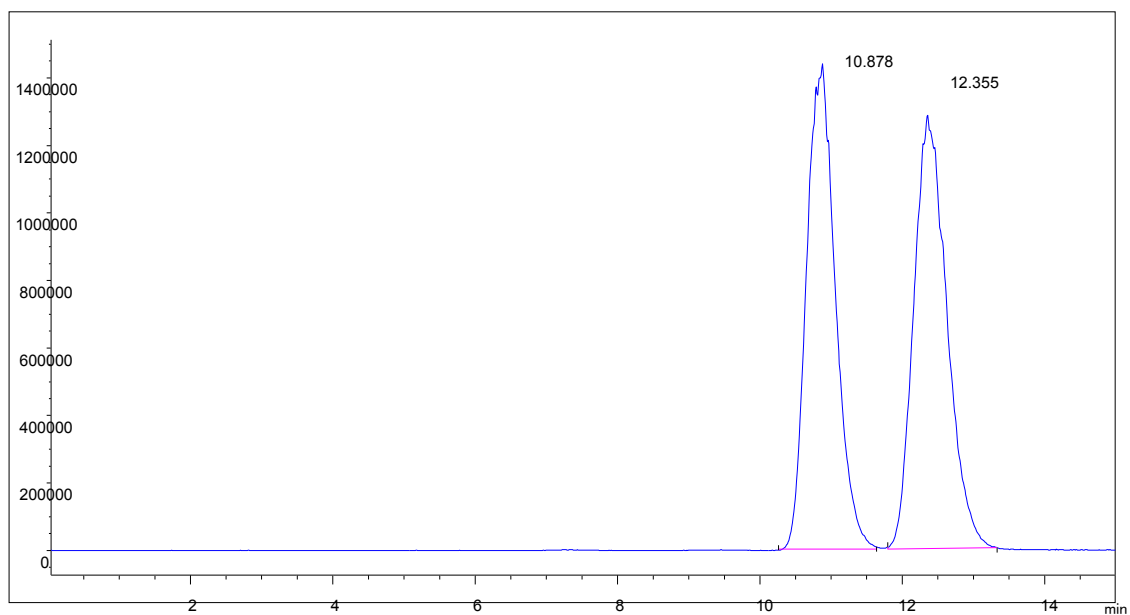

| # | Time (min) | Area (mAU*s) | Height (mAu) | Area % |
|---|------------|--------------|--------------|--------|
| 1 | 10.878     | 4068.6       | 144.3        | 49.389 |
| 2 | 12.355     | 4169.2       | 128.9        | 50.611 |

Fig.S 119 HPLC for racemic compound **3ao**

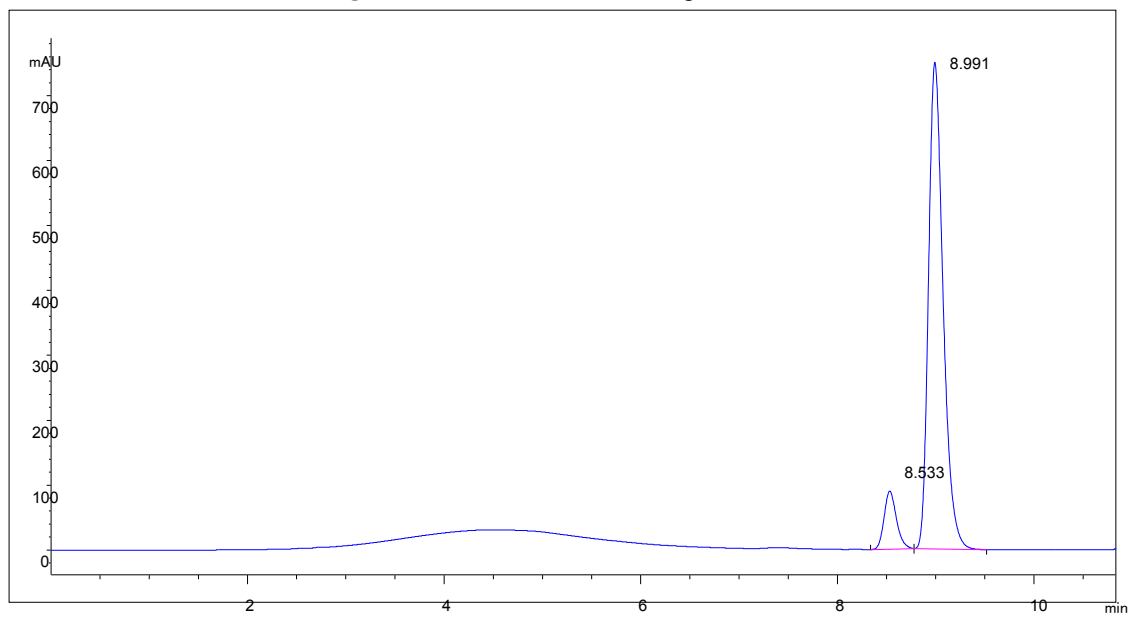

| # | Time (min) | Area (mAU*s) | Height (mAu) | Area % |
|---|------------|--------------|--------------|--------|
| 1 | 8.533      | 774.5        | 89.2         | 9.116  |
| 2 | 8.991      | 7721.7       | 749.5        | 90.884 |

Fig.S 120 HPLC for pure enantioenriched compound **3ao**

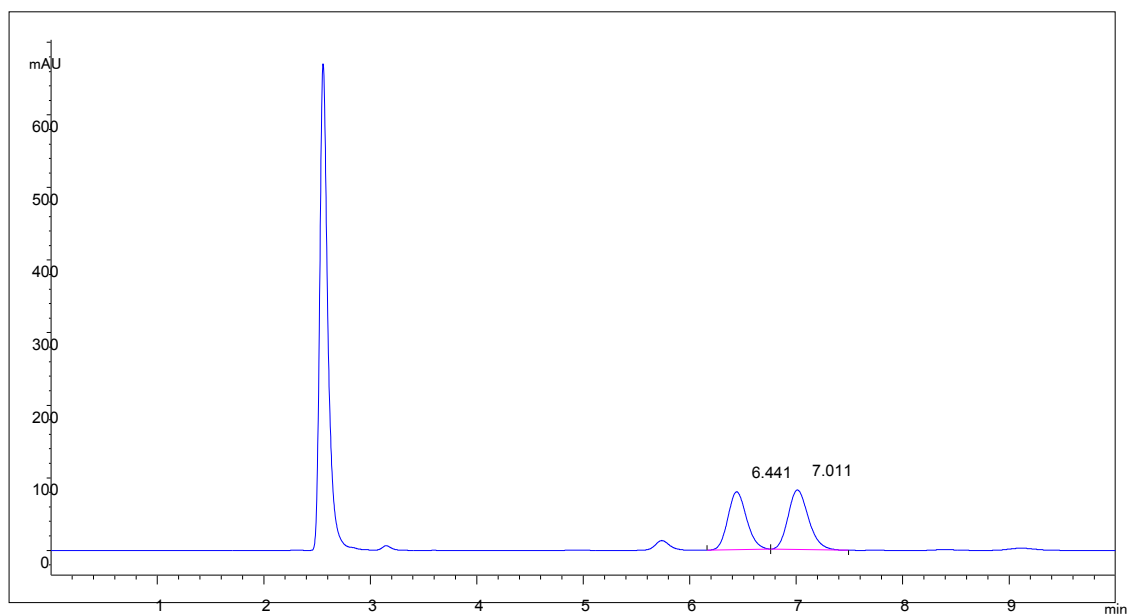

| # | Time (min) | Area (mAU*s) | Height (mAu) | Area % |
|---|------------|--------------|--------------|--------|
| 1 | 6.441      | 971.1        | 79.7         | 47.068 |
| 2 | 7.011      | 1092.1       | 82.1         | 52.932 |

Fig.S 121 HPLC for racemic compound **3bd**

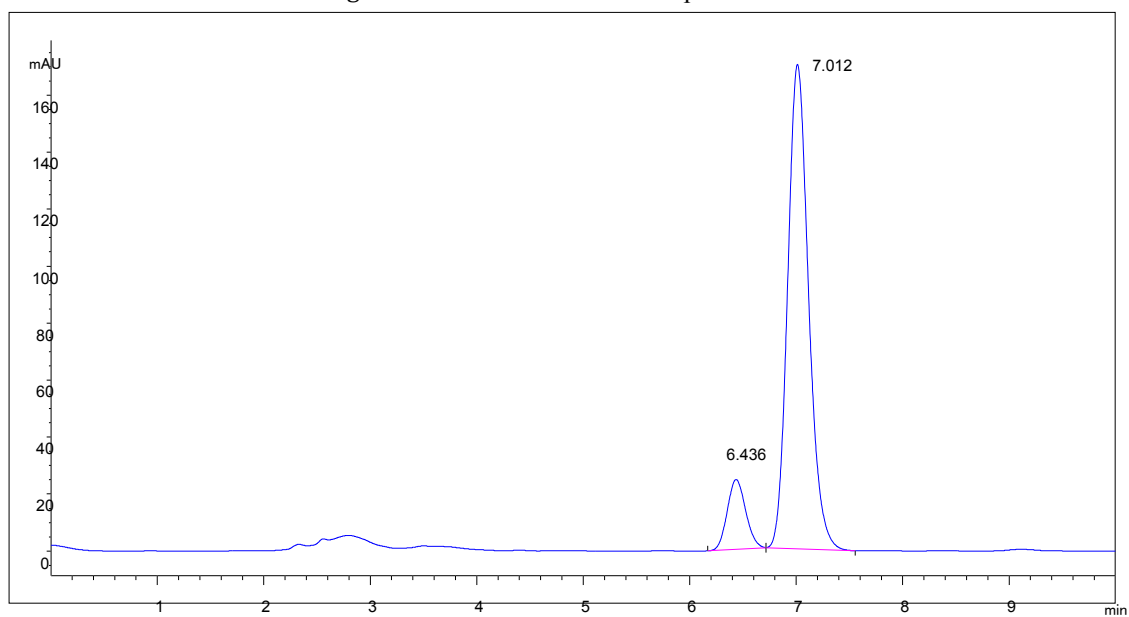

| # | Time (min) | Area (mAU*s) | Height (mAu) | Area % |
|---|------------|--------------|--------------|--------|
| 1 | 6.436      | 293.6        | 24.5         | 11.266 |
| 2 | 7.012      | 2312.1       | 170          | 88.734 |

Fig.S 122 HPLC for pure enantioenriched compound **3bd**

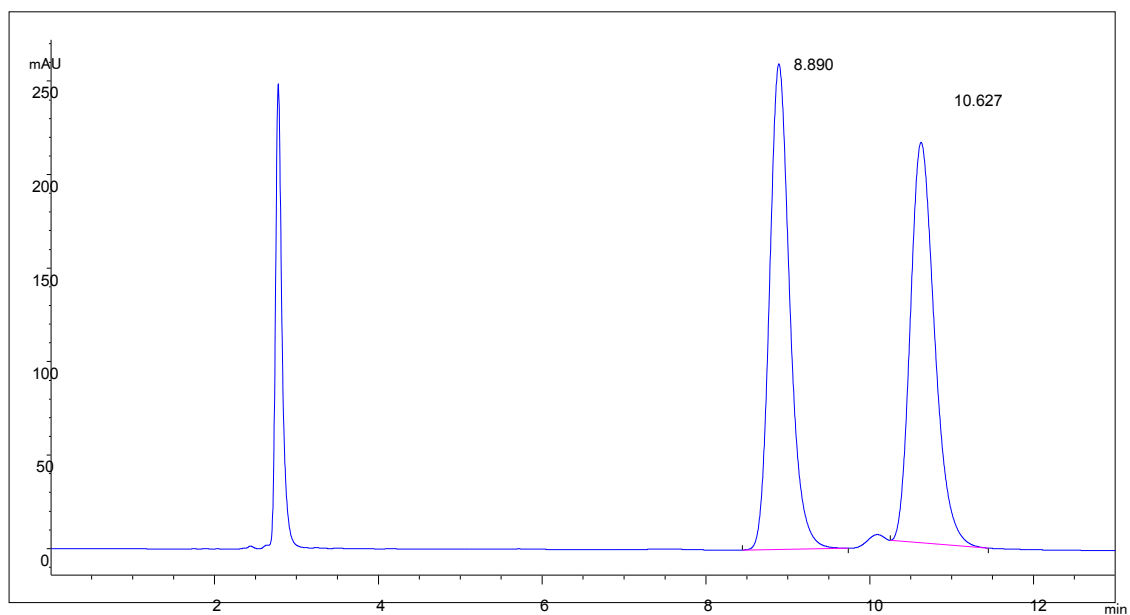

| # | Time (min) | Area (mAU*s) | Height (mAu) | Area % |
|---|------------|--------------|--------------|--------|
| 1 | 8.89       | 447.5        | 259.7        | 50.284 |
| 2 | 10.627     | 4397.3       | 214.2        | 49.716 |

Fig.S 123 HPLC for racemic compound **3cd**

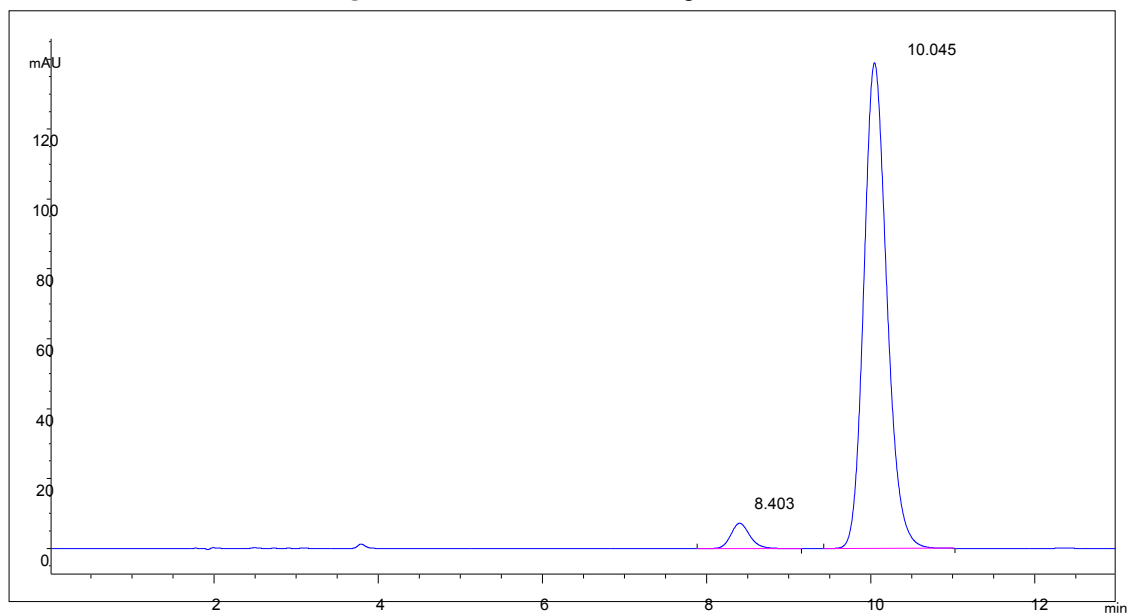

| # | Time (min) | Area (mAU*s) | Height (mAu) | Area % |
|---|------------|--------------|--------------|--------|
| 1 | 8.403      | 115.9        | 7.2          | 4.112  |
| 2 | 10.045     | 2703.2       | 139          | 95.888 |

Fig.S 124 HPLC for pure enantioenriched compound **3cd**

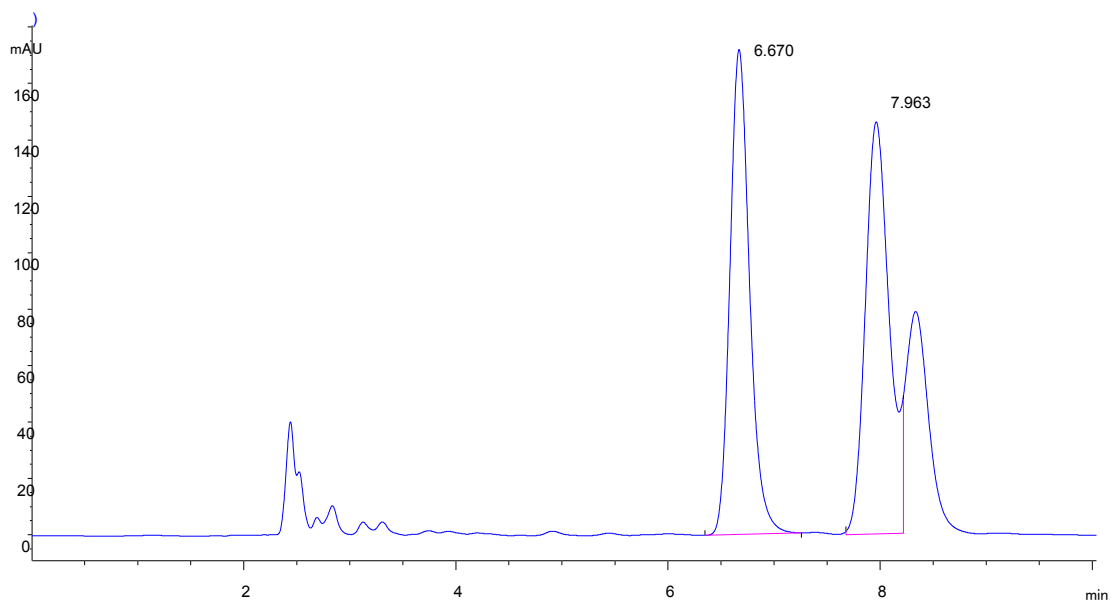

| # | Time (min) | Area (mAU*s) | Height (mAu) | Area % |
|---|------------|--------------|--------------|--------|
| 1 | 6.67       | 2217.1       | 171.9        | 48.829 |
| 2 | 7.963      | 2323.4       | 146.1        | 51.171 |

Fig.S 125 HPLC for racemic compound **3dd**

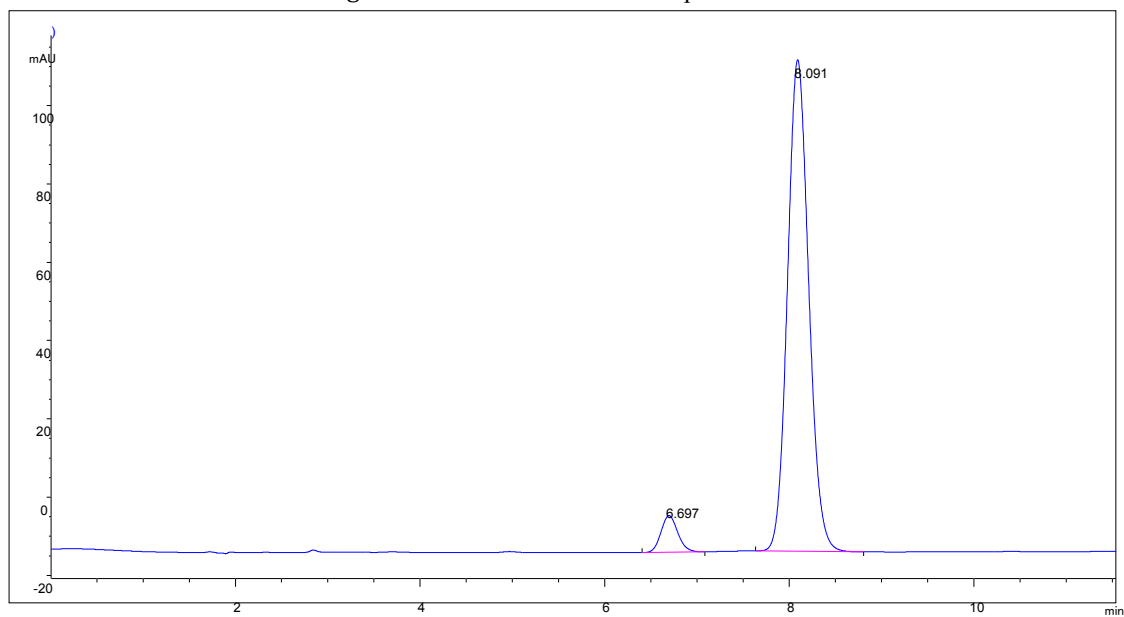

| # | Time (min) | Area (mAU*s) | Height (mAu) | Area % |
|---|------------|--------------|--------------|--------|
| 1 | 6.697      | 118.6        | 9.4          | 5.589  |
| 2 | 8.091      | 2003.5       | 125.5        | 94.411 |

Fig.S 126 HPLC for pure enantioenriched compound **3dd**

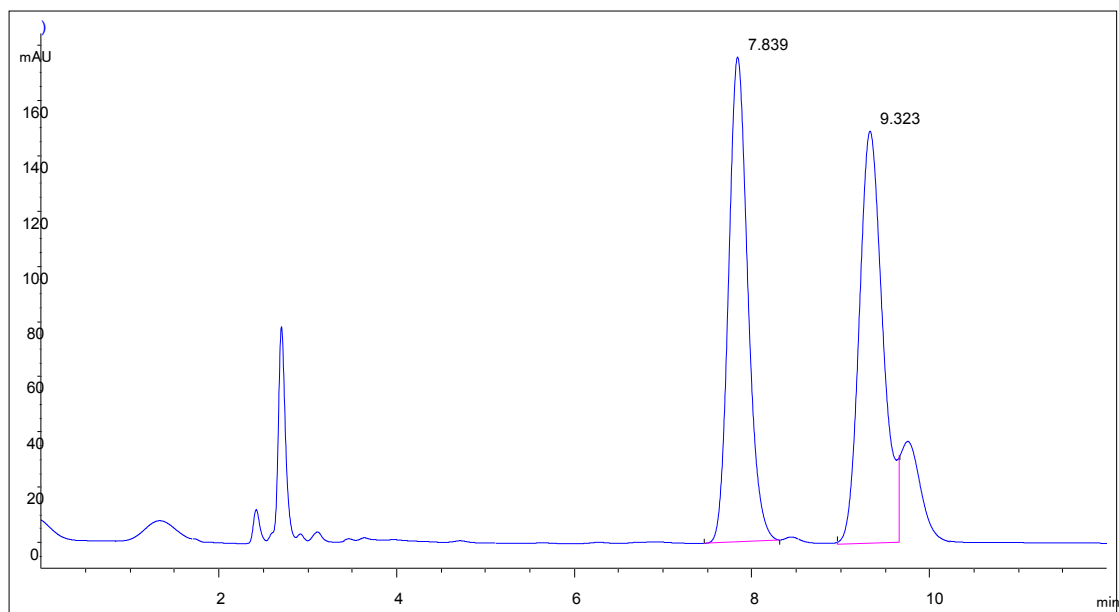

| # | Time (min) | Area (mAU*s) | Height (mAu) | Area % |
|---|------------|--------------|--------------|--------|
| 1 | 7.839      | 2630         | 175.5        | 48.697 |
| 2 | 9.323      | 2770.7       | 149.2        | 51.303 |

Fig.S 127 HPLC for racemic compound **3ed**

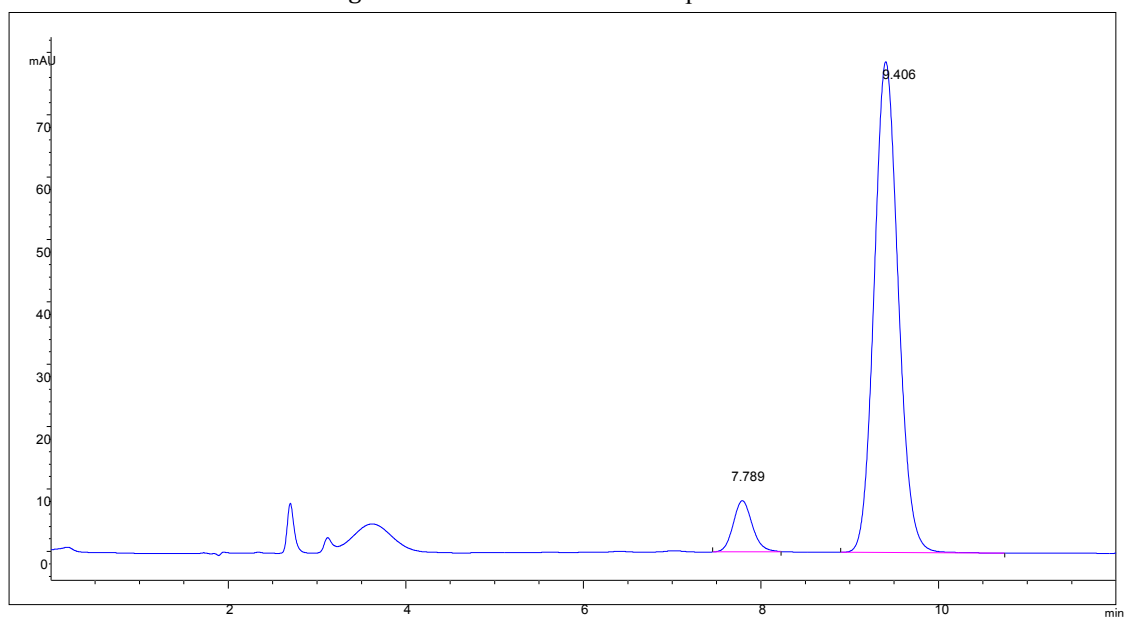

| # | Time (min) | Area (mAU*s) | Height (mAu) | Area % |
|---|------------|--------------|--------------|--------|
| 1 | 7.789      | 122.4        | 8.2          | 7.637  |
| 2 | 9.406      | 1480.9       | 78.7         | 92.363 |

Fig.S 128 HPLC for pure enantioenriched compound **3ed**



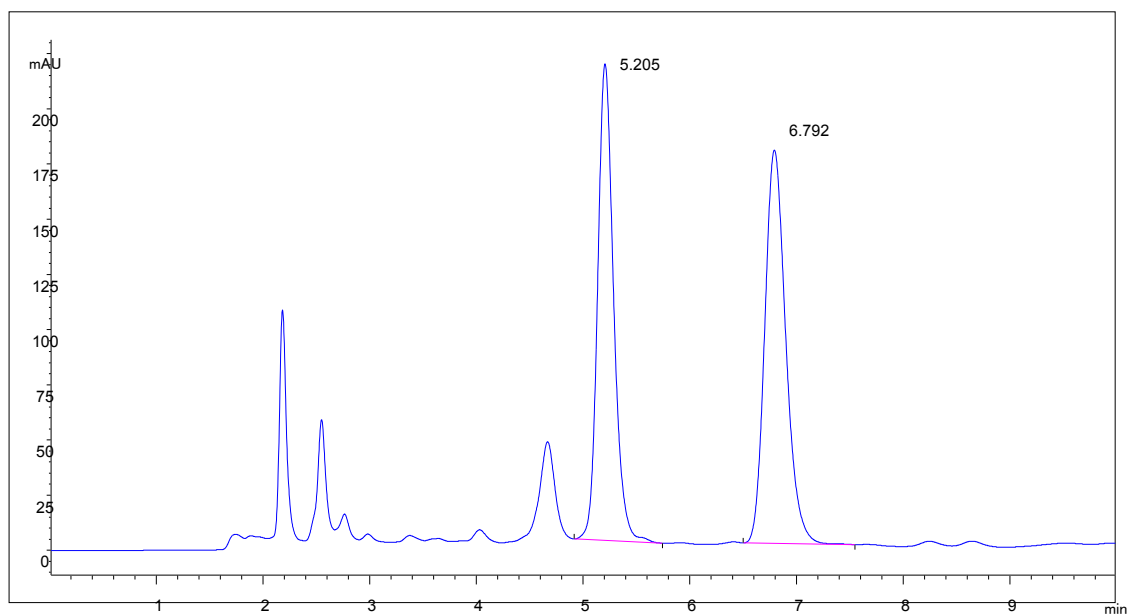

| # | Time (min) | Area (mAU*s) | Height (mAu) | Area % |
|---|------------|--------------|--------------|--------|
| 1 | 5.205      | 2244.9       | 216          | 47.987 |
| 2 | 6.798      | 2433.2       | 178.2        | 52.013 |

Fig.S 129 HPLC for racemic compound **3fd**

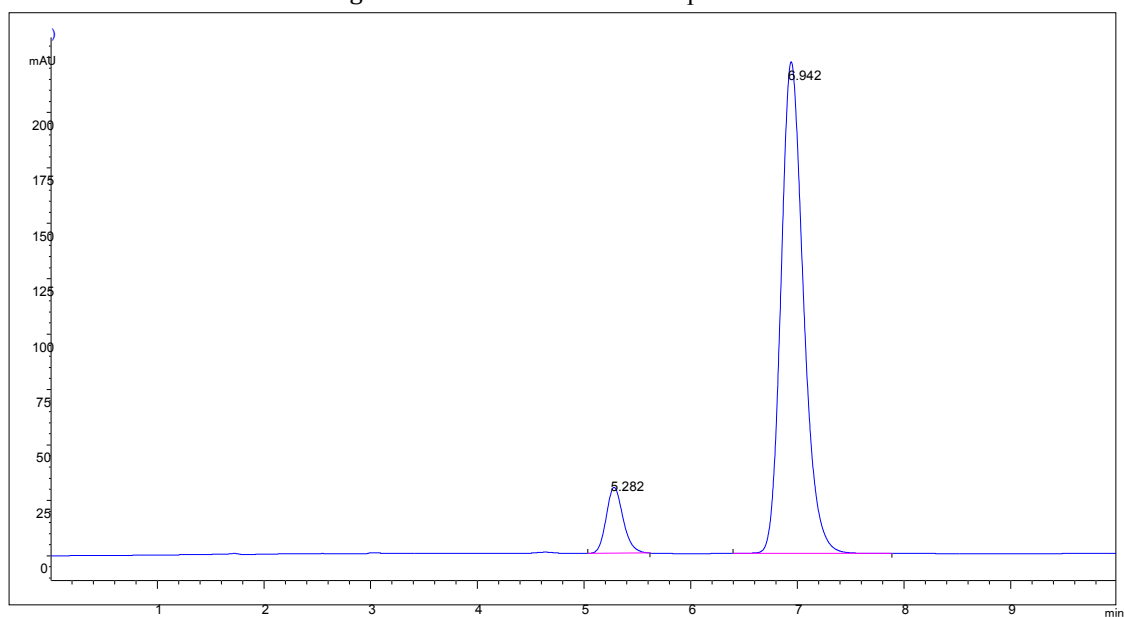

| # | Time (min) | Area (mAU*s) | Height (mAu) | Area % |
|---|------------|--------------|--------------|--------|
| 1 | 5.282      | 328.2        | 29.8         | 9.195  |
| 2 | 6.942      | 3240.7       | 221.8        | 90.805 |

Fig.S 130 HPLC for pure enantioenriched compound **3fd**

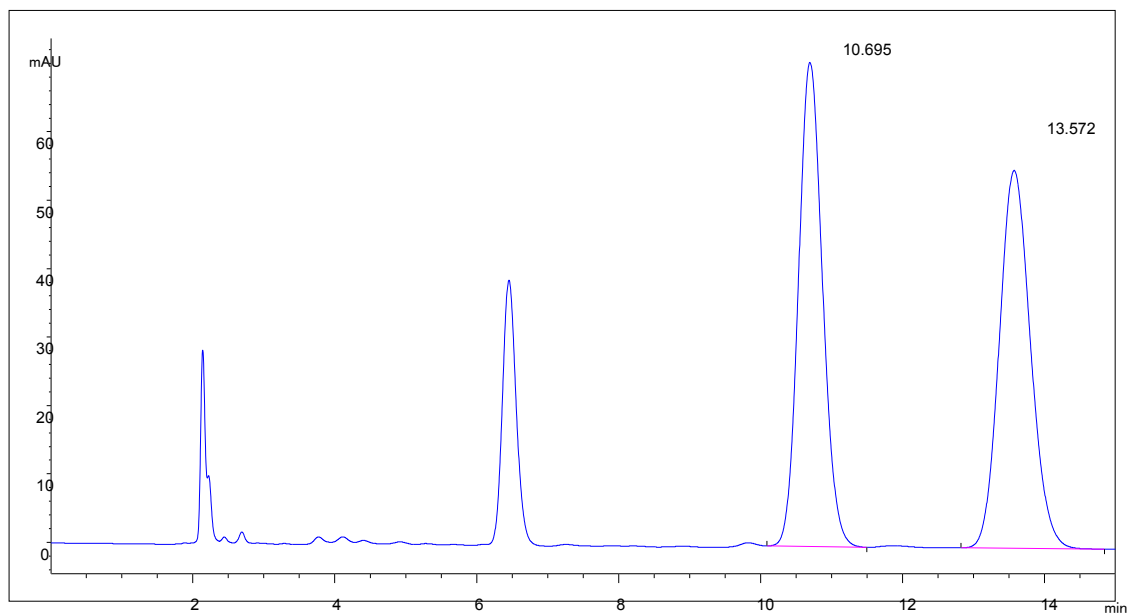

| # | Time (min) | Area (mAU*s) | Height (mAu) | Area % |
|---|------------|--------------|--------------|--------|
| 1 | 10.695     | 1664.3       | 70.7         | 49.753 |
| 2 | 13.572     | 1680.8       | 55.2         | 50.247 |

Fig.S 131 HPLC for racemic compound **3gd**

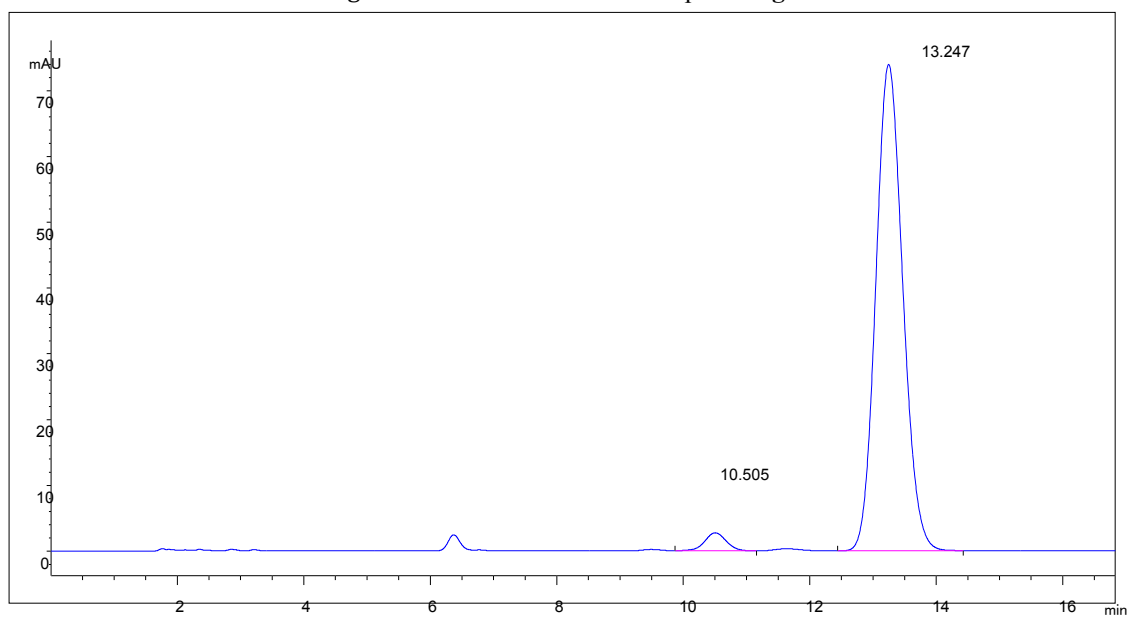

| # | Time (min) | Area (mAU*s) | Height (mAu) | Area % |
|---|------------|--------------|--------------|--------|
| 1 | 10.505     | 64.8         | 2.7          | 2.878  |
| 2 | 13.247     | 2188.7       | 73.9         | 97.122 |

Fig.S 132 HPLC for pure enantioenriched compound **3gd**

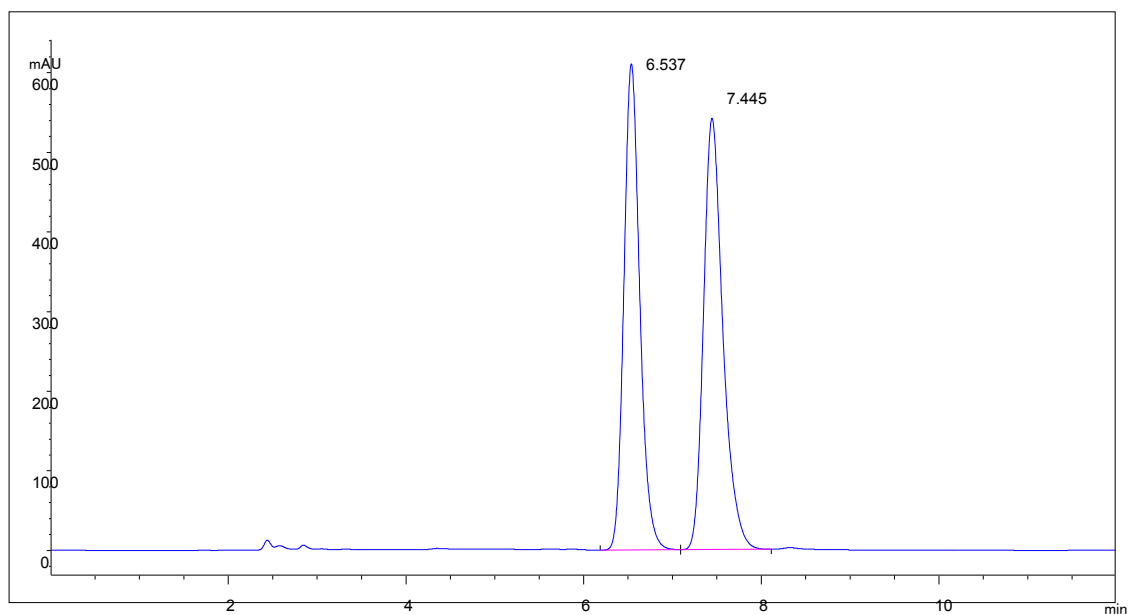

| # | Time (min) | Area (mAU*s) | Height (mAu) | Area % |
|---|------------|--------------|--------------|--------|
| 1 | 6.537      | 7584.7       | 610.5        | 47.964 |
| 2 | 7.445      | 8228.6       | 542          | 52.036 |

Fig.S 133 HPLC for racemic compound **3hd**

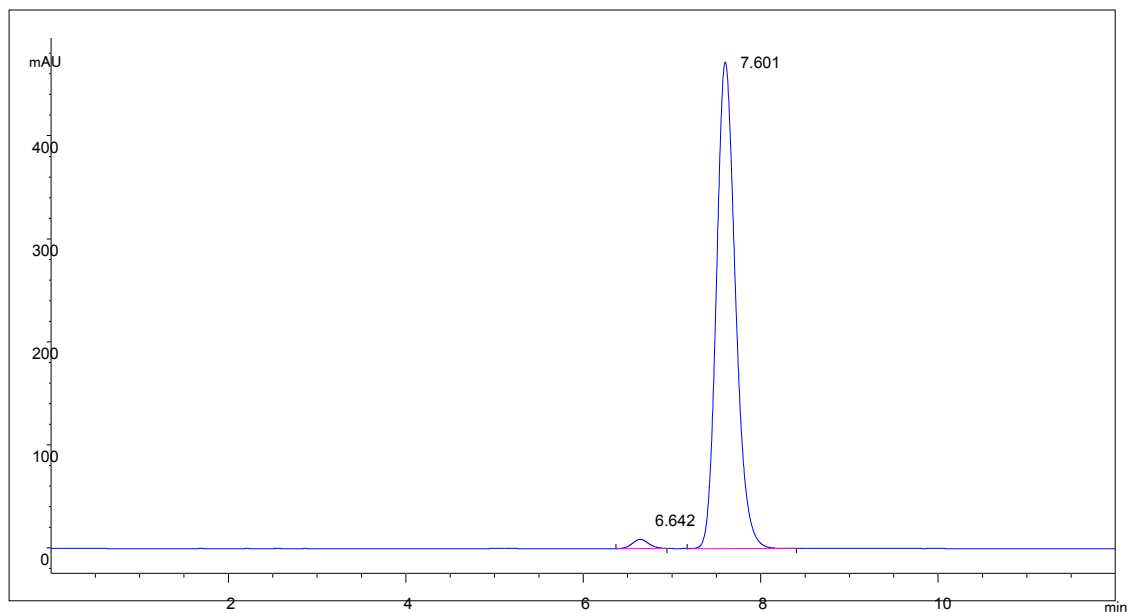

| # | Time (min) | Area (mAU*s) | Height (mAu) | Area % |
|---|------------|--------------|--------------|--------|
| 1 | 6.642      | 116.6        | 9            | 1.632  |
| 2 | 7.601      | 7028.4       | 472          | 98.369 |

Fig.S 134 HPLC for pure enantioenriched compound **3hd**

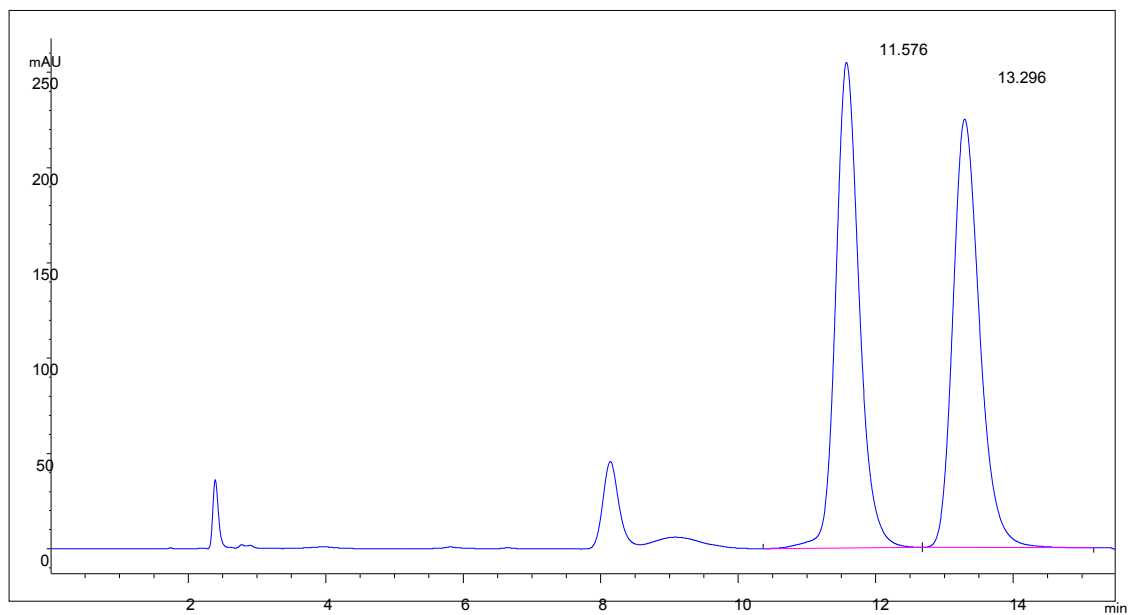

| # | Time (min) | Area (mAU*s) | Height (mAu) | Area % |
|---|------------|--------------|--------------|--------|
| 1 | 11.576     | 6066.3       | 254.7        | 49.999 |
| 2 | 13.296     | 6066.7       | 224.7        | 50.001 |

Fig.S 135 HPLC for racemic compound **3id**

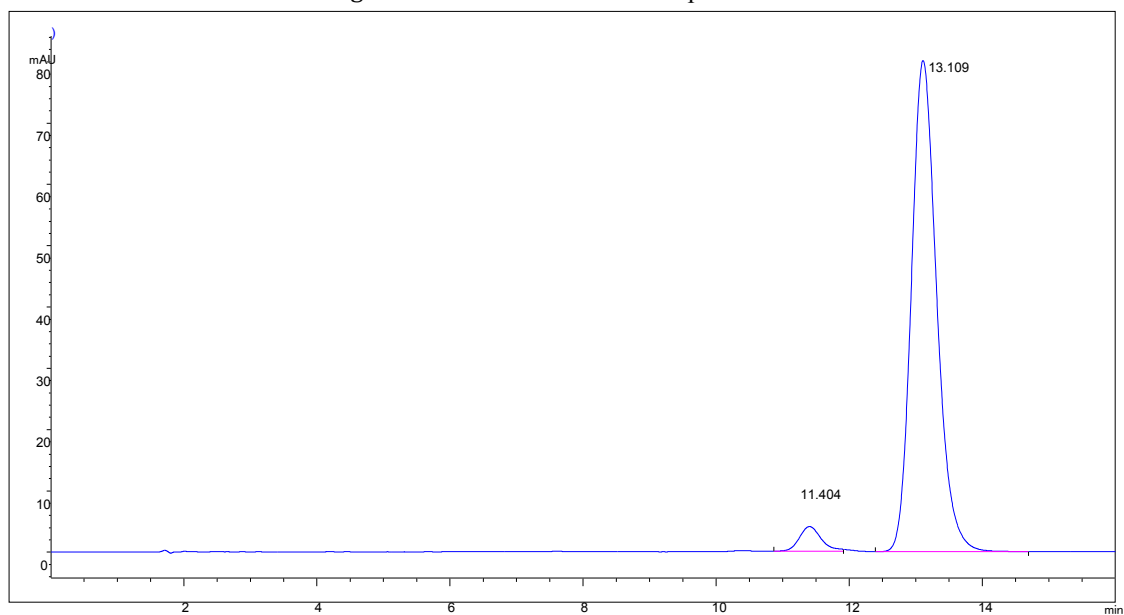

| # | Time (min) | Area (mAU*s) | Height (mAu) | Area % |
|---|------------|--------------|--------------|--------|
| 1 | 11.404     | 91           | 4            | 4.13   |
| 2 | 13.109     | 2111.7       | 80.1         | 95.87  |

Fig.S 136 HPLC for pure enantioenriched compound **3id**

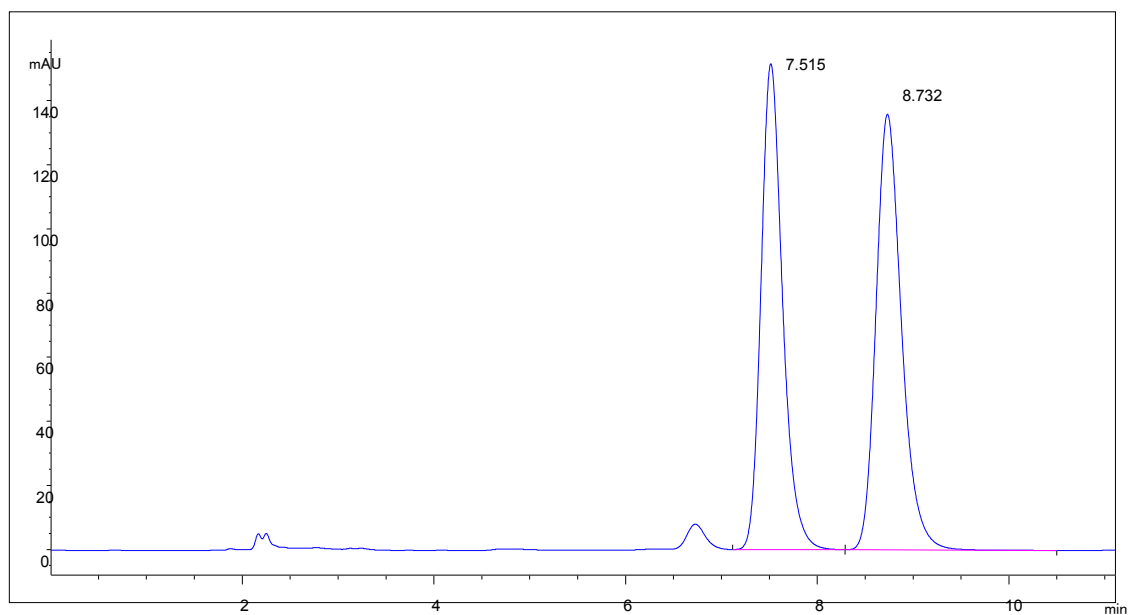

| # | Time (min) | Area (mAU*s) | Height (mAu) | Area % |
|---|------------|--------------|--------------|--------|
| 1 | 7.515      | 2374.6       | 151.6        | 48.5   |
| 2 | 8.732      | 2521.4       | 135.9        | 51.5   |

Fig.S 137 HPLC for racemic compound **3jd**

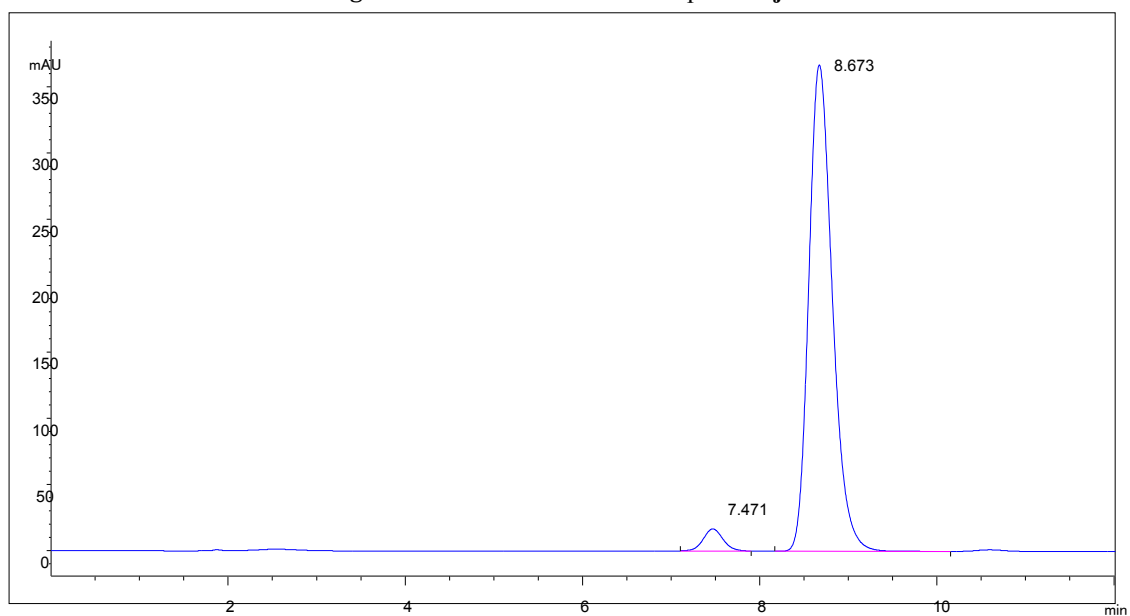

| # | Time (min) | Area (mAU*s) | Height (mAu) | Area % |
|---|------------|--------------|--------------|--------|
| 1 | 7.471      | 263.7        | 16.8         | 3.745  |
| 2 | 8.673      | 6778.4       | 367.2        | 96.255 |

Fig.S 138 HPLC for pure enantioenriched compound **3jd**

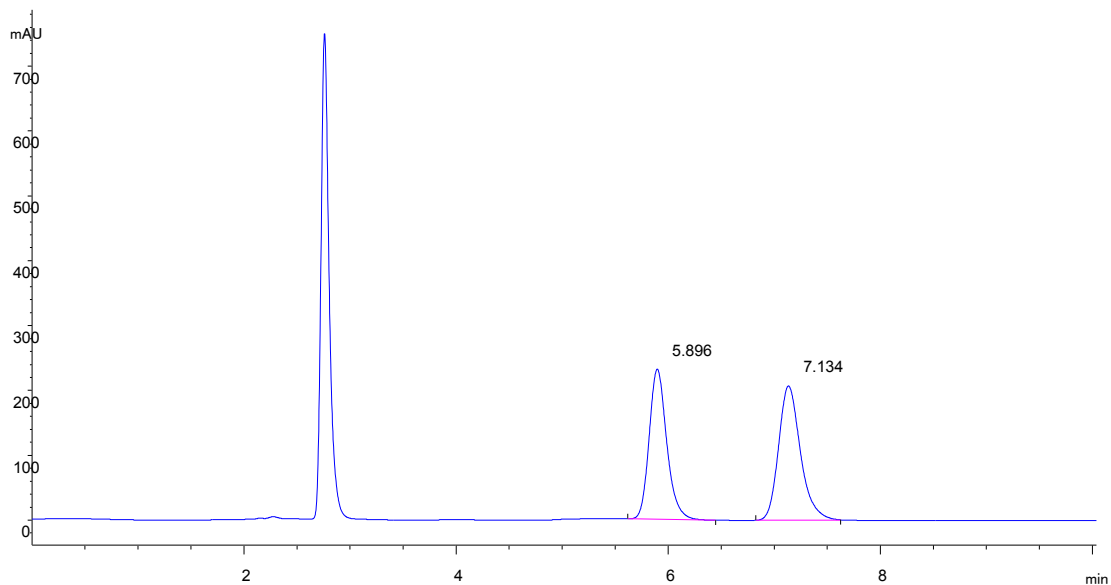

| # | Time (min) | Area (mAU*s) | Height (mAu) | Area % |
|---|------------|--------------|--------------|--------|
| 1 | 5.896      | 2671         | 231.6        | 47.419 |
| 2 | 7.134      | 2961.8       | 206.8        | 52.581 |

Fig.S 139 HPLC for racemic compound **3kd**

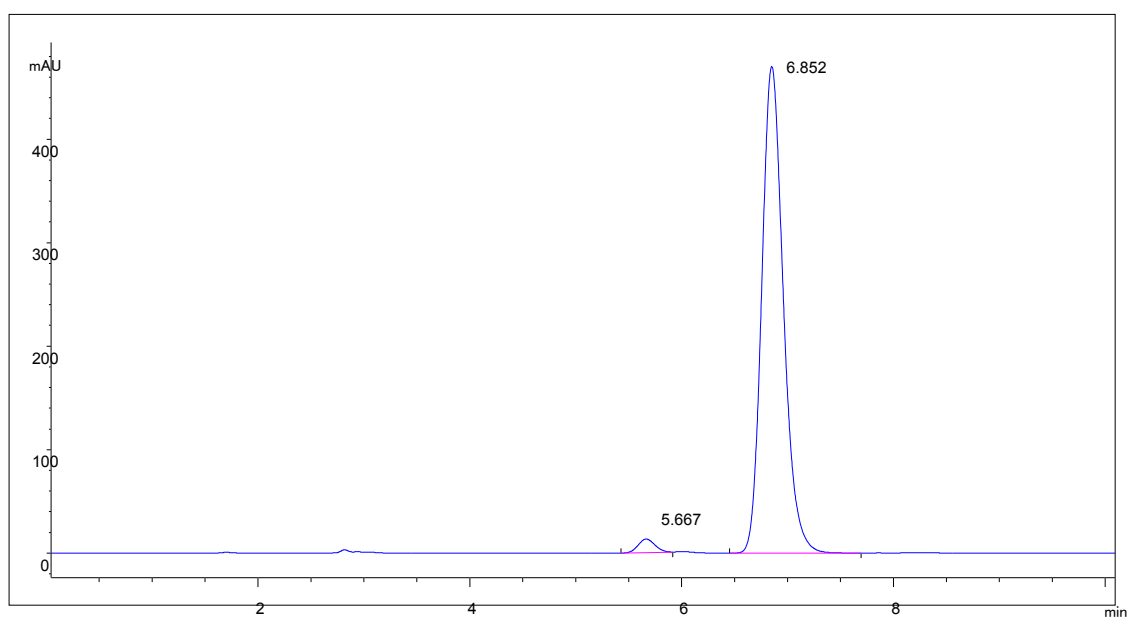

| # | Time (min) | Area (mAU*s) | Height (mAu) | Area % |
|---|------------|--------------|--------------|--------|
| 1 | 5.667      | 143.4        | 13           | 2.108  |
| 2 | 6.852      | 6658.1       | 470.3        | 97.892 |

Fig.S 140 HPLC for pure enantioenriched compound **3kd**

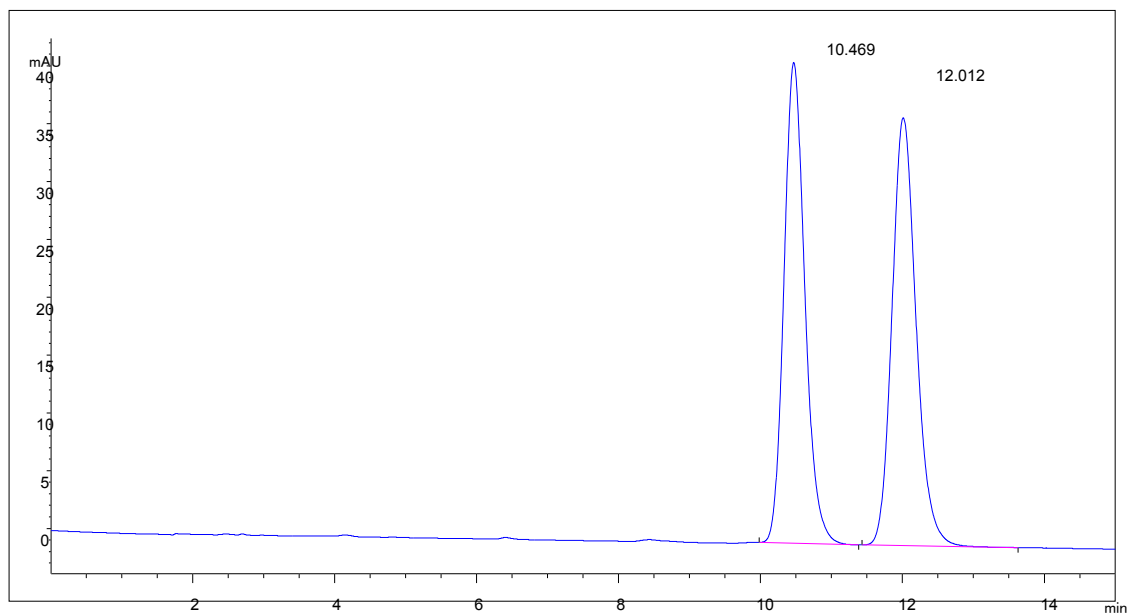

| # | Time (min) | Area (mAU*s) | Height (mAu) | Area % |
|---|------------|--------------|--------------|--------|
| 1 | 10.345     | 1320.5       | 63.6         | 49.026 |
| 2 | 11.882     | 1373         | 56.9         | 50.974 |

Fig.S 141 HPLC for racemic compound **3ld**

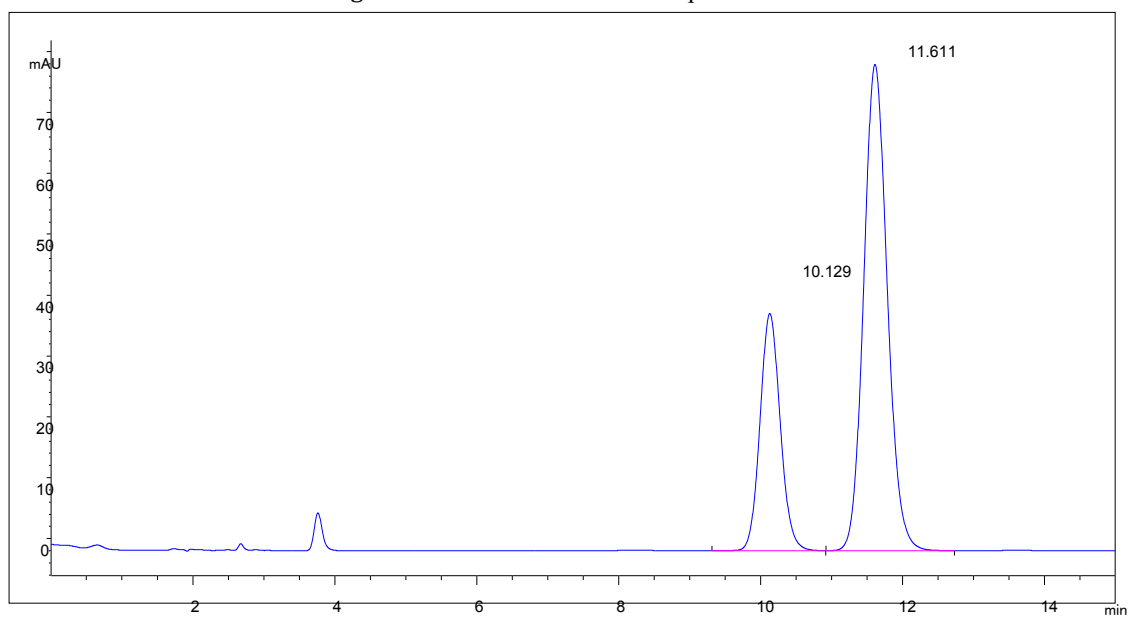

| # | Time (min) | Area (mAU*s) | Height (mAu) | Area % |
|---|------------|--------------|--------------|--------|
| 1 | 10.129     | 774.1        | 39           | 29.527 |
| 2 | 11.611     | 1847.6       | 79.9         | 70.473 |

Fig.S 142 HPLC for pure enantioenriched compound **3ld**

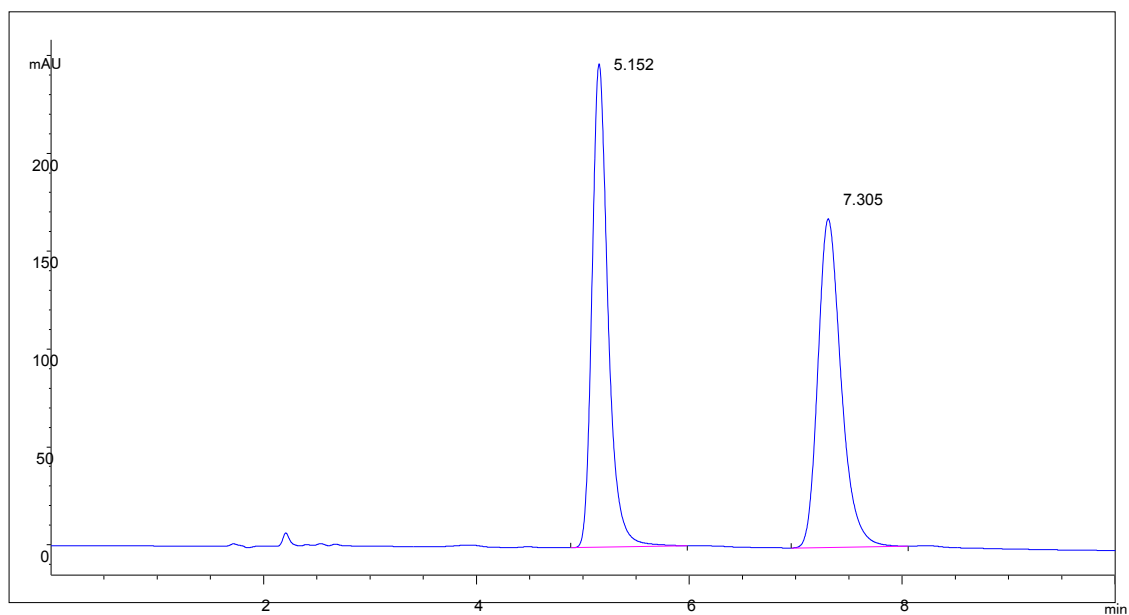

| # | Time (min) | Area (mAU*s) | Height (mAu) | Area % |
|---|------------|--------------|--------------|--------|
| 1 | 5.152      | 2587.7       | 247          | 50.42  |
| 2 | 7.305      | 2544.5       | 167.9        | 49.58  |

Fig.S 143 HPLC for racemic compound **3md**

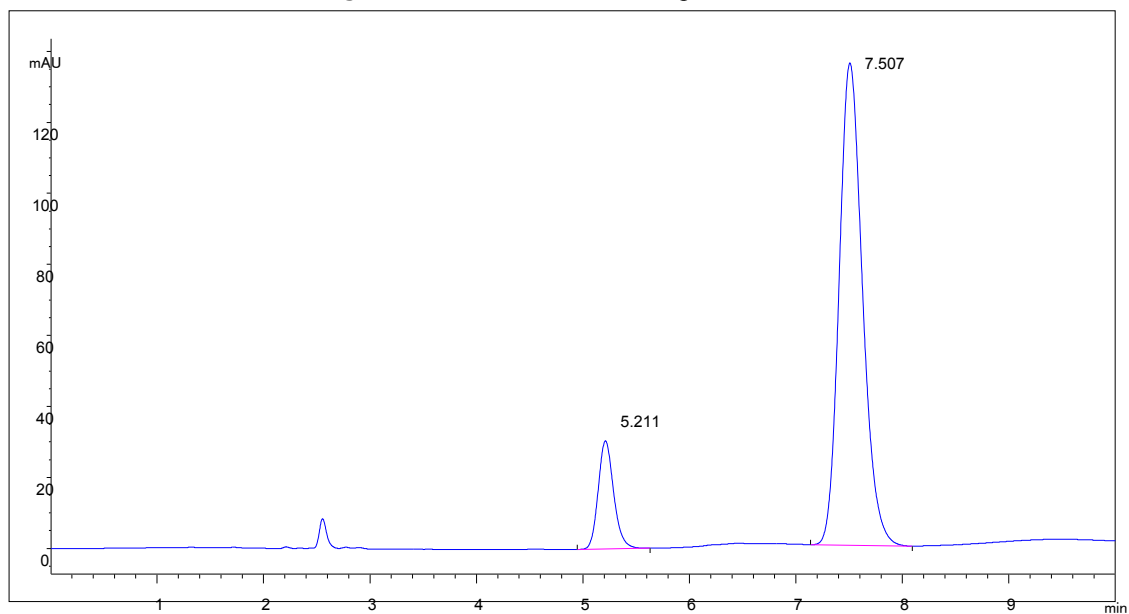

| # | Time (min) | Area (mAU*s) | Height (mAu) | Area % |
|---|------------|--------------|--------------|--------|
| 1 | 5.211      | 308.5        | 30.5         | 12.992 |
| 2 | 7.507      | 2066         | 135.9        | 87.008 |

Fig.S 144 HPLC for pure enantioenriched compound **3md**



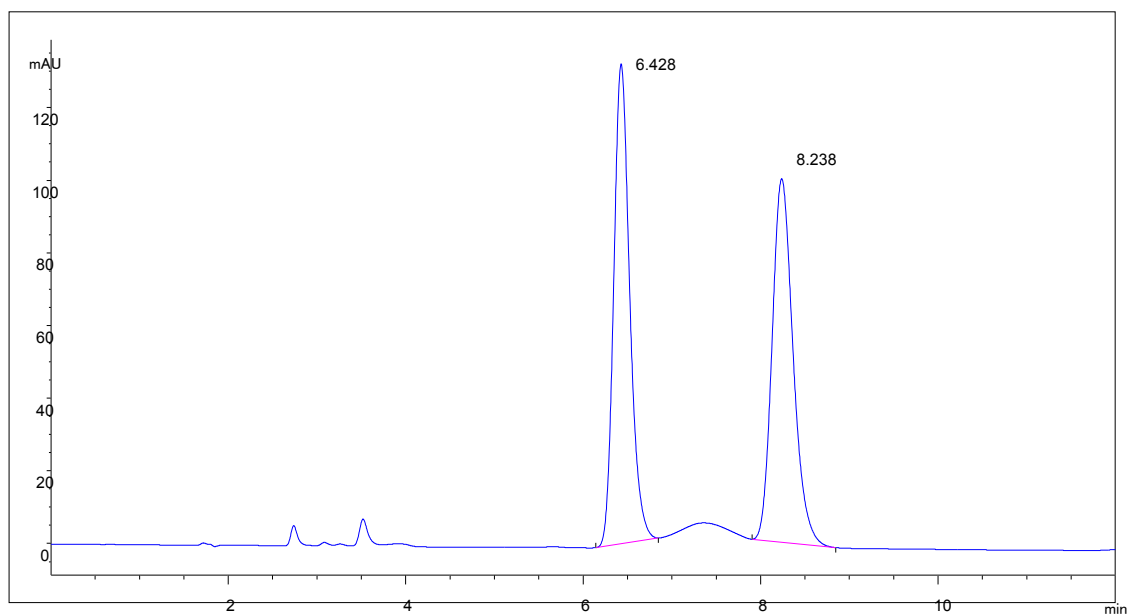

| # | Time (min) | Area (mAU*s) | Height (mAu) | Area % |
|---|------------|--------------|--------------|--------|
| 1 | 6.428      | 1650.4       | 132.1        | 50.127 |
| 2 | 8.238      | 1642.1       | 100.1        | 49.873 |

Fig.S 145 HPLC for racemic compound **3nd**

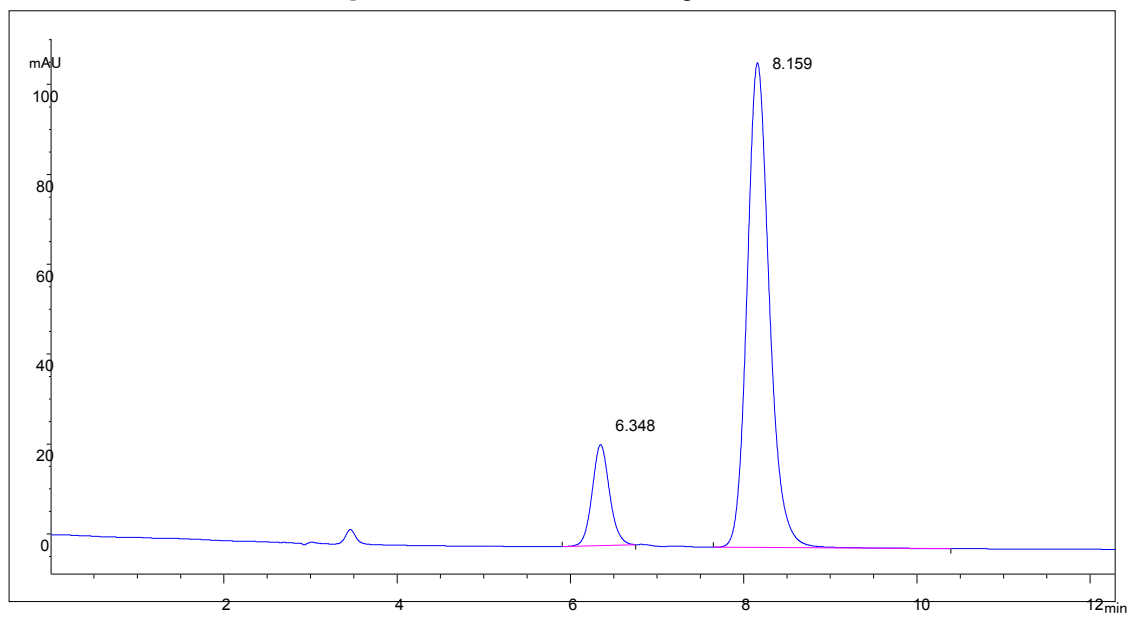

| # | Time (min) | Area (mAU*s) | Height (mAu) | Area % |
|---|------------|--------------|--------------|--------|
| 1 | 6.348      | 313.1        | 22.5         | 13.962 |
| 2 | 8.159      | 1929.4       | 107.9        | 86.038 |

Fig.S 146 HPLC for pure enantioenriched compound **3nd**

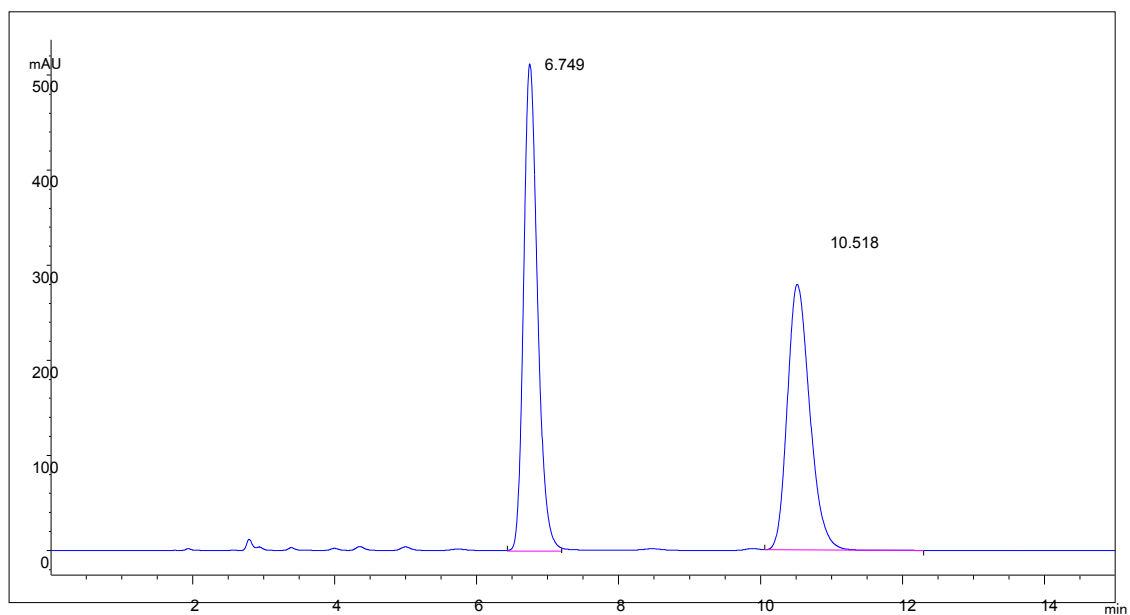

| # | Time (min) | Area (mAU*s) | Height (mAu) | Area % |
|---|------------|--------------|--------------|--------|
| 1 | 6.749      | 7001.9       | 512.5        | 53.359 |
| 2 | 10.518     | 612.3        | 279.2        | 46.641 |

Fig.S 147 HPLC for racemic compound **3od**

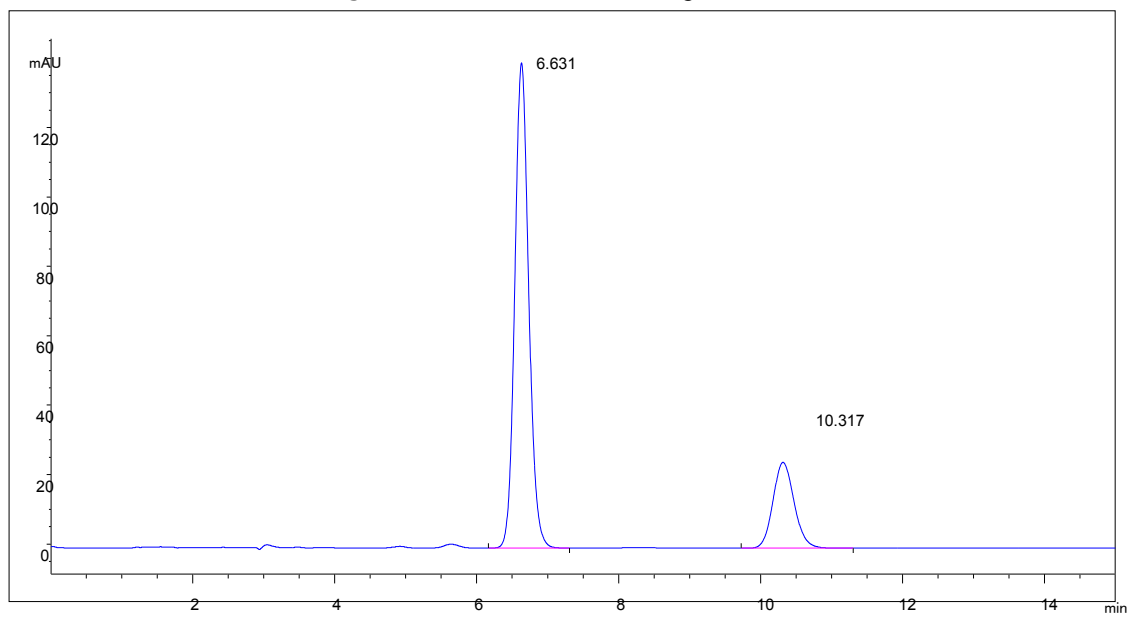

| # | Time (min) | Area (mAU*s) | Height (mAu) | Area % |
|---|------------|--------------|--------------|--------|
| 1 | 6.631      | 1910.1       | 139.8        | 78.809 |
| 2 | 10.317     | 513.6        | 24.7         | 21.191 |

Fig.S 148 HPLC for pure enantioenriched compound **3od**

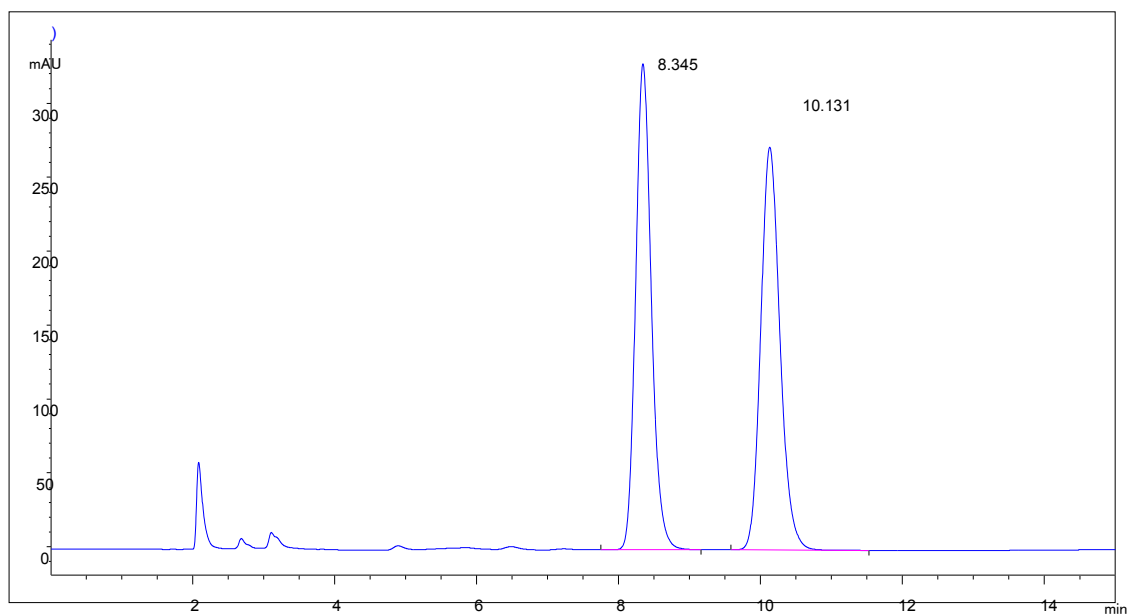

| # | Time (min) | Area (mAU*s) | Height (mAu) | Area % |
|---|------------|--------------|--------------|--------|
| 1 | 8.345      | 5047         | 328.7        | 49.592 |
| 2 | 10.131     | 5130         | 272.5        | 50.408 |

Fig.S 149 HPLC for racemic compound **3pd**

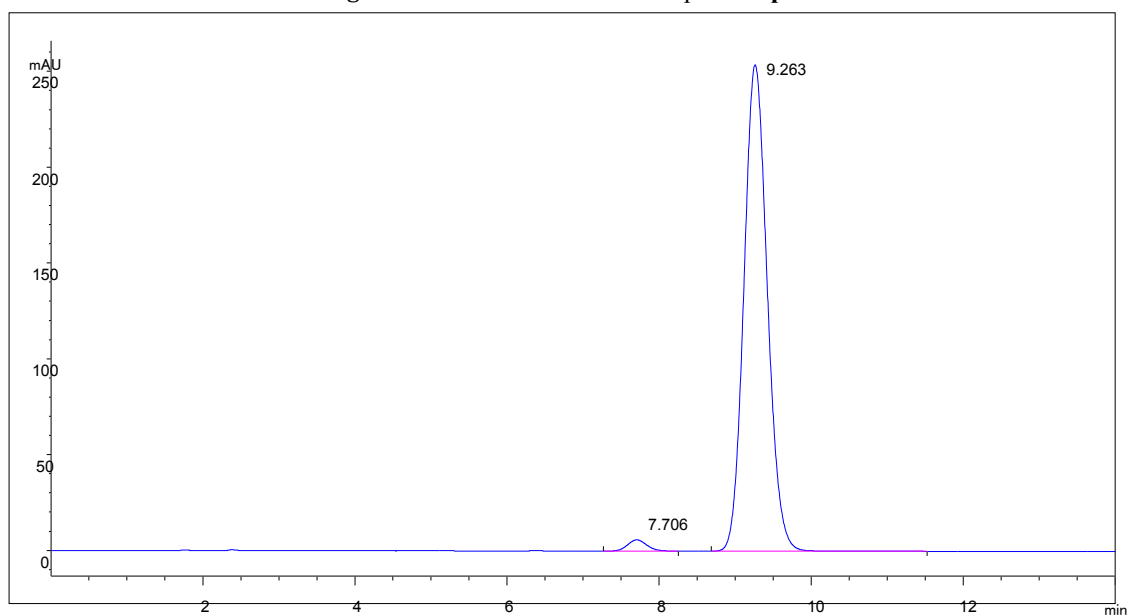

| # | Time (min) | Area (mAU*s) | Height (mAu) | Area % |
|---|------------|--------------|--------------|--------|
| 1 | 7.706      | 102          | 5.8          | 1.883  |
| 2 | 9.263      | 5403.6       | 253.7        | 98.147 |

Fig.S 150 HPLC for pure enantioenriched compound **3pd (Gram-scale)**
